# Supplementary material for: Cost-effective density functional theory (DFT) calculations of equilibrium isotopic fractionation in large organic molecules
Source: Royal Society of Chemistry journal article supplement (doi:10.1039/c9cp02975c), 2019-01-01
Supplement: c9cp02975c1.pdf [file c9cp02975c1.pdf]

# Cost-Effective Density Functional Theory (DFT) to Calculations of Equilibrium Isotopic Fractionation in Large Organic Molecules

*Mark A. Iron<sup>a,\*</sup> and Jonathan Gropp<sup>b</sup>*

<sup>a</sup> Computational Chemistry Unit, Department of Chemical Research Support, Weizmann Institute of  
Science, Rehovot, Israel 7610001.

<sup>b</sup> Department of Earth and Planetary Sciences, Weizmann Institute of Science, Rehovot, Israel 7610001.

**Electronic Supplementary Information**

## Table of Contents

|                                                                                                                                                                                                                                                                                                                                                                                                                                     |    |
|-------------------------------------------------------------------------------------------------------------------------------------------------------------------------------------------------------------------------------------------------------------------------------------------------------------------------------------------------------------------------------------------------------------------------------------|----|
| Description of Additional Corrections to Urey's Model.....                                                                                                                                                                                                                                                                                                                                                                          | 3  |
| Heavy Atom Fractionation – Evaluation of Errors in CNOEIF35.....                                                                                                                                                                                                                                                                                                                                                                    | 6  |
| <b>Table S1.</b> Summary of the errors in CNOEIF35 and how there are affected by various changes to the reactions as written in reference, with the final selection highlighted in green. ....                                                                                                                                                                                                                                      | 7  |
| <b>Table S2.</b> $\lambda_{harm}$ scale factors for various GGA and meta-GGA exchange–correlation functional–basis set–density fitting basis set combinations.....                                                                                                                                                                                                                                                                  | 10 |
| <b>Table S3.</b> Root-mean-square deviations (RMSD, $\text{cm}^{-1}$ ) of $\lambda_{harm}$ for various GGA and meta-GGA exchange–correlation functional–basis set–density fitting basis set combinations. ....                                                                                                                                                                                                                      | 18 |
| <b>Table S4.</b> $\lambda_{ZPE}$ scale factors for various GGA and meta-GGA exchange–correlation functional–basis set–density fitting basis set combinations.....                                                                                                                                                                                                                                                                   | 26 |
| <b>Table S5.</b> Root-mean-square deviations (RMSD, $\text{cm}^{-1}$ ) of $\lambda_{ZPE}$ for various GGA and meta-GGA exchange–correlation functional–basis set–density fitting basis set combinations. ....                                                                                                                                                                                                                       | 34 |
| <b>Table S6.</b> $\lambda_{fund}$ scale factors for various GGA and meta-GGA exchange–correlation functional–basis set–density fitting basis set combinations.....                                                                                                                                                                                                                                                                  | 42 |
| <b>Table S7.</b> Root-mean-square deviations (RMSD, $\text{cm}^{-1}$ ) of $\lambda_{fund}$ for various GGA and meta-GGA exchange–correlation functional–basis set–density fitting basis set combinations. ....                                                                                                                                                                                                                      | 50 |
| <b>Table S8.</b> $\lambda_{harm}$ scale factors for various hybrid-GGA and hybrid-meta-GGA exchange–correlation functional–basis set combinations.....                                                                                                                                                                                                                                                                              | 58 |
| <b>Table S9.</b> Root-mean-square deviations (RMSD, $\text{cm}^{-1}$ ) of $\lambda_{harm}$ for various hybrid-GGA and hybrid-meta-GGA exchange–correlation functional–basis set combinations.....                                                                                                                                                                                                                                   | 61 |
| <b>Table S10.</b> $\lambda_{ZPE}$ scale factors for various hybrid-GGA and hybrid-meta-GGA exchange–correlation functional–basis set combinations.....                                                                                                                                                                                                                                                                              | 64 |
| <b>Table S11.</b> Root-mean-square deviations (RMSD, $\text{cm}^{-1}$ ) of $\lambda_{harm}$ for various hybrid-GGA and hybrid-meta-GGA exchange–correlation functional–basis set combinations.....                                                                                                                                                                                                                                  | 67 |
| <b>Table S12.</b> $\lambda_{fund}$ scale factors for various hybrid-GGA and hybrid-meta-GGA exchange–correlation functional–basis set combinations.....                                                                                                                                                                                                                                                                             | 70 |
| <b>Table S13.</b> Root-mean-square deviations (RMSD, $\text{cm}^{-1}$ ) of $\lambda_{fund}$ for various hybrid-GGA and hybrid-meta-GGA exchange–correlation functional–basis set combinations.....                                                                                                                                                                                                                                  | 73 |
| <b>Table S14.</b> $\lambda_{harm}$ scale factors for various double hybrid exchange–correlation functional–basis set combinations. ....                                                                                                                                                                                                                                                                                             | 76 |
| <b>Table S15.</b> Root-mean-square deviations (RMSD, $\text{cm}^{-1}$ ) of $\lambda_{harm}$ for various double hybrid exchange–correlation functional–basis set combinations. ....                                                                                                                                                                                                                                                  | 78 |
| <b>Table S16.</b> $\lambda_{ZPE}$ scale factors for various double hybrid exchange–correlation functional–basis set combinations.....                                                                                                                                                                                                                                                                                               | 80 |
| <b>Table S17.</b> Root-mean-square deviations (RMSD, $\text{cm}^{-1}$ ) of $\lambda_{ZPE}$ for various double hybrid exchange–correlation functional–basis set combinations. ....                                                                                                                                                                                                                                                   | 82 |
| <b>Table S18.</b> $\lambda_{fund}$ scale factors for various double hybrid exchange–correlation functional–basis set combinations. ....                                                                                                                                                                                                                                                                                             | 84 |
| <b>Table S19.</b> Root-mean-square deviations (RMSD, $\text{cm}^{-1}$ ) of $\lambda_{fund}$ for various double hybrid exchange–correlation functional–basis set combinations. ....                                                                                                                                                                                                                                                  | 86 |
| <b>Table S20.</b> Isotopic fractionation $\alpha$ at 50°C with respect to liquid water calculated with selected exchange-correlation functionals, the def2-TZVP basis set and SMD solvation model for a series of ketones, compared to Wang <i>et al.</i> 's experimental (expt) and calculated (calc) values, calculated using Liu <i>et al.</i> 's formula Eq. 1) for $\beta$ using $ZPE_{harm}$ scaled by $\lambda_{ZPE}$ . .... | 88 |

**Table S21.** Isotopic fractionation  $\alpha$  at 70°C with respect to liquid water calculated with selected exchange-correlation functionals, the def2-TZVP basis set and SMD solvation model for a series of ketones, compared to Wang *et al.*'s experimental (expt) and calculated (calc) values, calculated using Liu *et al.*'s formula Eq. 1) for  $\beta$  using  $ZPE_{\text{harm}}$  scaled by  $\lambda_{ZPE}$ ..... 89

References ..... 90

## Description of Additional Corrections to Urey's Model

Liu *et al.* recently evaluated, for small molecules, the Bigeleisen–Mayer equations and various corrections (see refence for full details).<sup>S1</sup> The first two are corrections for vibrational–rotational coupling for the ground ( $Q_{VrZPE}$ ) and vibrational excited states ( $Q_{VrEXC}$ ):

$$Q_{VrZPE} = \prod_{\sigma} \left( \frac{\sigma_e}{\sigma_0} \right)^{1/2} = \left( \frac{A_e}{A_0} \cdot \frac{B_e}{B_0} \cdot \frac{C_e}{C_0} \right)^{1/2}$$

$$Q_{VrEXC} = 1 = \frac{1}{2} \sum_i^{n_{vib}} \frac{\delta_i}{\exp(u'_i) - 1}$$

where  $n_{vib}$  is the number of vibrational frequencies (degrees of freedom, *i.e.*,  $3N-5$  for linear molecules and  $3N-6$  otherwise),  $\sigma_e$  (and consequently  $A_e$ ,  $B_e$  and  $C_e$ ) is the equilibrium rotational constant around axis  $\sigma$  (*i.e.*, axes A, B, C),  $\sigma_0 = \sigma_e - \sum_i \alpha_{\sigma,i}$  (and consequently  $A_0$ ,  $B_0$  and  $C_0$ ) is the rotational constant around axis  $\sigma$  in the vibrational ground state where  $\alpha_{\sigma,i}$  is the vibration–rotation coupling constant between axis  $\sigma$  and normal mode  $i$ ,  $u'_i = \frac{hc\nu_i}{k_B T}$  is the equivalent of  $u_i$  but with the fundamental frequencies  $\nu_i$  from an anharmonic frequency calculation and  $\delta_i = \sum_{\sigma} \frac{\alpha_{\sigma,i}}{\sigma_0}$ . For a linear molecule, where there is only one rotational constant, one has instead of the above:<sup>S2</sup>

$$Q_{VrZPE} = \frac{\sigma_e}{\sigma_0}$$

The third and fourth correct for deviations due to anharmonicity of the vibrational ground ( $Q_{AnZPE}$ ) and excited ( $Q_{AnEXC}$ ) states:

$$Q_{AnZPE} = \exp\left(-\frac{hcG_0}{k_B T}\right) \prod_{i \leq j} \exp\left(-\frac{hc x_{ij}}{4k_B T}\right)$$

$$Q_{AnEXC} = 1 - \frac{2hc}{k_B T} \sum_i \frac{x_{ii} \cdot \exp(u_i)}{(\exp(u_i) - 1)^2} - \frac{hc}{2k_B T} \sum_{i < j} \frac{x_{ij}(\exp(u_i) + \exp(u_j))}{(\exp(u_i) - 1) \cdot (\exp(u_j) - 1)}$$

where  $x_{ij}$  is the anharmonic coupling constant between normal modes  $i$  and  $j$ , and  $G_0$  is a complicated function of the second, third and fourth force constants. An equivalent expression for  $Q_{AnZPE}$  used by Liu *et al.* for reasons of numerical accuracy is:

$$Q_{AnZPE} = \frac{\exp\left(-\frac{ZPE_{tot}}{k_B T}\right)}{\exp\left(-\frac{ZPE_{harm}}{k_B T}\right)}$$

where  $ZPE_{harm} = \frac{1}{2} \sum_i hc\omega_i$  and  $ZPE_{tot}$  are the harmonic and total (anharmonic) ZPEs, respectively.

The fifth is the quantum mechanical correction for rotation ( $Q_{QmCorr}$ ):

$$Q_{QmCorr} = 1 + \frac{1}{12} \cdot \frac{hc}{k_B T} \left( 2A_0 + 2B_0 + 2C_0 + \frac{B_0 C_0}{A_0} + \frac{A_0 C_0}{B_0} + \frac{A_0 B_0}{C_0} \right)$$

where all terms are as defined above. For a linear molecule:<sup>S3</sup>

$$Q_{QmCorr} = 1 + \frac{hc}{k_B T} \cdot \frac{\sigma_0}{3} + \dots$$

The sixth is a correction for centrifugal distortion ( $Q_{CenDist}$ ):

$$Q_{CenDist} = 1 - \frac{hck_B T}{4\hbar^4} (3\tau_{aaaa}I_A^2 + 3\tau_{bbbb}I_B^2 + 3\tau_{cccc}I_C^2 + 2\tau_{bbaa}I_B I_A + 2\tau_{ccbb}I_C I_B + 2\tau_{ccaa}I_C I_A)$$

where  $\tau_{\sigma\sigma\sigma'\sigma'}$  is the quartic centrifugal distortion constant and  $I_\sigma$  is the principle moment of inertia around axis  $\sigma$ .

The seventh is a correction for hindered internal rotation ( $Q_{HIR}$ ):

$$Q_{HIR} = \prod_i^{\text{hindered torsions}} \frac{(2\pi k_B T)^{1/2}}{s_i \hbar} I_i^{1/2} \cdot \exp\left(-\frac{W_i}{2k_B T}\right) I_0\left(\frac{W_i}{2k_B T}\right) \left(Q_{Class}^{HO}(\omega_i^{tor})\right)^{-1}$$

where  $s_i$  is the symmetry number of torsional mode  $i$  (which can be ignored in isotope fractionation calculations)  $W_i = 8\pi^2 c^2 (\omega_i^{tor})^2 I_i / s_i^2$  is the barrier height for torsion  $i$ ,  $I_0$  is a zeroth-order modified Bessel function and  $Q_{Class}^{HO}(\omega_i^{tor}) = \frac{k_B T}{hc\omega_i^{tor}}$  is the classical harmonic oscillator partition function of

torsional mode  $i \omega_i^{tor}$ . While  $Q_{HIR}$  can be calculated independently, it is actually part of the output from the hindered rotor output from GAUSSIAN16 when the appropriate keyword is added; three partition functions are provided – based on derivations by Truhlar(ref), Pitzer and Gwinn(ref) and McClurg(ref) – and based on recommendations by Liu *et al.* the Pitzer–Gwinn approximation is used here.<sup>S1</sup>

## Heavy Atom Fractionation – Evaluation of Errors in CNOEIF35

While developing the CNOEIF35 database (Table 10), the reactions were initially considered based on how they were written in the original references. This, however, gave in many cases significant errors. As discussed in the main text, these reactions were reevaluated using slight modifications. As noted, this may include using the acid or conjugate base form of one or more of the reaction species, adding explicit solvent molecules (explicit solvation) and/or using the experimental liquid-gas isotopic fractionation. When calculating the D/H fractionation of ketones with water, the solution  $\beta$  was determined using the calculated gas-phase  $\beta$  and  $\alpha_{liq-gas}^{expt}$ . For heavy-atom isotopic fractionation, the solvation of H<sub>2</sub>O, CO<sub>2</sub> and HCO<sub>3</sub><sup>-</sup> are potentially problematic. In these three cases, the  $\beta$  for liquid water and aqueous CO<sub>2</sub> could be determined using the calculated gas-phase  $\beta$  and the experimental gas-solution fractionation ( $\alpha_{liq-gas}^{expt}$ ) of water,<sup>S4</sup> CO<sub>2</sub>,<sup>S5</sup> or HCO<sub>3</sub><sup>-</sup>.<sup>S6</sup>

$$1000 \ln({}^{18}\alpha_{H_2O}^{expt}) = \frac{3.5041 \times 10^8}{T^3} - \frac{1.6664 \times 10^6}{T^2} + \frac{6.7123 \times 10^3}{T} - 7.685$$

$$1000 \ln({}^{13}\alpha_{CO_2}^{expt}) = 0.0041 \cdot T - 1.18$$

$$1000 \ln({}^{13}\alpha_{HCO_3^-(aq)-CO_2(g)}^{expt}) = \frac{9483}{T} - 23.89$$

However, it was found (*vide infra*) that the SMD model actually gives lower errors, albeit occasionally marginally, with respect to the experimental values than when using  $\alpha_{liq-gas}^{expt}$ . How each reaction is affected by the different changes is outlined in Table S1. Note that not all reactions required this evaluation.

**Table S1.** Summary of the errors in CNOEIF35 and how there are affected by various changes to the reactions as written in reference, with the final selection highlighted in green.

| Reaction                                                | Change to “as written” <sup>a</sup>                                                                                 | MAD (%) |
|---------------------------------------------------------|---------------------------------------------------------------------------------------------------------------------|---------|
| 1 isocitrate → CO <sub>2(aq)</sub>                      |                                                                                                                     | 11      |
|                                                         | isocitric acid→                                                                                                     | 5       |
|                                                         | →CO <sub>2(g)</sub>                                                                                                 | 17      |
|                                                         | →CO <sub>2(g)</sub> ×( <sup>13</sup> C <sub>O<sub>2</sub></sub> α <sup>expt</sup> <sub>aq-gas</sub> )               | 17      |
|                                                         | isocitric acid→CO <sub>2(g)</sub>                                                                                   | 11      |
|                                                         | isocitric acid→CO <sub>2(g)</sub> ×( <sup>13</sup> C <sub>O<sub>2</sub></sub> α <sup>expt</sup> <sub>aq-gas</sub> ) | 12      |
| 2 6-phosphogluconate → CO <sub>2(aq)</sub>              |                                                                                                                     | 1       |
|                                                         | 6-phosphogluconic acid→                                                                                             | 4       |
|                                                         | →CO <sub>2(g)</sub>                                                                                                 | 17      |
|                                                         | →CO <sub>2(g)</sub> ×( <sup>13</sup> C <sub>O<sub>2</sub></sub> α <sup>expt</sup> <sub>aq-gas</sub> )               | 17      |
| 3 malate → CO <sub>2(aq)</sub>                          |                                                                                                                     | 3       |
|                                                         | malic acid→                                                                                                         | 9       |
|                                                         | →CO <sub>2(g)</sub>                                                                                                 | 3       |
|                                                         | →CO <sub>2(g)</sub> ×( <sup>13</sup> C <sub>O<sub>2</sub></sub> α <sup>expt</sup> <sub>aq-gas</sub> )               | 4       |
| 5 malate(CHOH) → pyruvate(C=O)                          |                                                                                                                     | 19      |
|                                                         | malate+H <sub>2</sub> O→                                                                                            | 20      |
|                                                         | malic acid→                                                                                                         | 5       |
|                                                         | →pyruvate+H <sub>2</sub> O                                                                                          | 21      |
|                                                         | →pyruvic acid                                                                                                       | 23      |
|                                                         | malic acid→pyruvic acid                                                                                             | 10      |
| 6 malate(CH <sub>2</sub> ) → pyruvate(CH <sub>3</sub> ) |                                                                                                                     | 4       |
|                                                         | malic acid→                                                                                                         | 8       |
|                                                         | →pyruvic acid                                                                                                       | 3       |
|                                                         | malic acid→pyruvic acid                                                                                             | 7       |



| Reaction                                                                                                        | Change to "as written" <sup>a</sup>                                                                                                                   | MAD (%) |
|-----------------------------------------------------------------------------------------------------------------|-------------------------------------------------------------------------------------------------------------------------------------------------------|---------|
| 7 carbonate $\rightarrow$ $\text{HCO}_3^-$ (aq)                                                                 |                                                                                                                                                       | 2       |
|                                                                                                                 | $\rightarrow \text{CO}_2(\text{g}) \times \left( {}^{13}\alpha_{\text{HCO}_3^-(\text{aq})-\text{CO}_2(\text{g})}^{\text{expt}} \right)$               | 16      |
|                                                                                                                 | $\rightarrow \text{CO}_2(\text{aq})$                                                                                                                  | 2       |
|                                                                                                                 | carbamic acid $\rightarrow$                                                                                                                           | 5       |
|                                                                                                                 | carbamic acid $\rightarrow \text{CO}_2(\text{g}) \times \left( {}^{13}\alpha_{\text{HCO}_3^-(\text{aq})-\text{CO}_2(\text{g})}^{\text{expt}} \right)$ | 24      |
|                                                                                                                 | carbamic acid $\rightarrow \text{CO}_2(\text{aq})$                                                                                                    | 9       |
| 8 carbamate $\rightarrow$ carbamoyl phosphate                                                                   |                                                                                                                                                       | 2       |
|                                                                                                                 | carbamic acid $\rightarrow$                                                                                                                           | 5       |
| 9 N,N-tetramethylenecarbamate $\rightarrow$ $\text{CO}_2(\text{g})$                                             | (in dioxane solution)                                                                                                                                 | 13      |
|                                                                                                                 | N,N-tetramethylenecarbamic acid $\rightarrow$                                                                                                         | 7       |
|                                                                                                                 | $\rightarrow \text{CO}_2(\text{sol})$                                                                                                                 | 17      |
|                                                                                                                 | N,N-tetramethylenecarbamic acid $\rightarrow \text{CO}_2(\text{sol})$                                                                                 | 5       |
|                                                                                                                 | (in aqueous solution)                                                                                                                                 | 23      |
|                                                                                                                 |                                                                                                                                                       |         |
| 20 (21) $\text{NH}_4^+ \rightarrow \text{NH}_3(\text{g})$ ( $\text{ND}_4^+ \rightarrow \text{ND}_3(\text{g})$ ) |                                                                                                                                                       | 11 (10) |
|                                                                                                                 | $\rightarrow \text{NH}_3(\text{aq})$                                                                                                                  | 11 (10) |
|                                                                                                                 | $\text{NH}_4^+ \cdot \text{H}_2\text{O} \rightarrow$                                                                                                  | 11 (10) |
|                                                                                                                 | $\text{NH}_4^+ \cdot \text{H}_2\text{O} \rightarrow \text{NH}_3(\text{aq})$                                                                           | 11 (10) |
|                                                                                                                 | $\rightarrow \text{NH}_3 \cdot \text{H}_2\text{O}$                                                                                                    | 7 (7)   |
|                                                                                                                 | $\text{NH}_4^+ \cdot \text{H}_2\text{O} \rightarrow \text{NH}_3 \cdot \text{H}_2\text{O}$                                                             | 7 (6)   |
| 23 phenylalanine $\rightarrow$ $\text{NH}_3(\text{aq})$                                                         |                                                                                                                                                       | 26      |
|                                                                                                                 | $\rightarrow \text{NH}_3(\text{g})$                                                                                                                   | 26      |
|                                                                                                                 | $\rightarrow \text{NH}_4^+$                                                                                                                           | 4       |
| 26 malate $\rightarrow$ $\text{H}_2\text{O}(\text{l})$                                                          |                                                                                                                                                       | 6       |
|                                                                                                                 | malic acid $\rightarrow$                                                                                                                              | 8       |
|                                                                                                                 | $\rightarrow \text{H}_2\text{O}(\text{g}) \times \left( {}^{18}\alpha_{\text{H}_2\text{O}^{\text{liq-gas}}}^{\text{expt}} \right)$                    | 16      |
| 27 ketoglutarate $\rightarrow$ $\text{H}_2\text{O}(\text{l})$                                                   |                                                                                                                                                       | 2       |
|                                                                                                                 | $\rightarrow \text{H}_2\text{O}(\text{g}) \times \left( {}^{18}\alpha_{\text{H}_2\text{O}^{\text{liq-gas}}}^{\text{expt}} \right)$                    | 8       |

| Reaction | Change to "as written" <sup>a</sup>                                                                                                                          | MAD (%) |
|----------|--------------------------------------------------------------------------------------------------------------------------------------------------------------|---------|
| 28       | <i>p</i> -nitrophenyl acetate → <i>p</i> -nitrophenolate                                                                                                     | 3       |
|          | → <i>p</i> -nitrophenolate+H <sub>2</sub> O                                                                                                                  | 1       |
| 29       | <i>p</i> -nitrophenol → <i>p</i> -nitrophenolate                                                                                                             | 8       |
|          | <i>p</i> -nitrophenol+H <sub>2</sub> O→                                                                                                                      | 11      |
|          | → <i>p</i> -nitrophenolate+H <sub>2</sub> O                                                                                                                  | 4       |
|          | <i>p</i> -nitrophenol+H <sub>2</sub> O→ <i>p</i> -nitrophenolate+H <sub>2</sub> O                                                                            | 7       |
| 30       | HPO <sub>4</sub> <sup>2-</sup> → PO <sub>4</sub> <sup>3-</sup>                                                                                               | 12      |
|          | HPO <sub>4</sub> <sup>2-</sup> · H <sub>2</sub> O→                                                                                                           | 10      |
|          | →PO <sub>4</sub> <sup>3-</sup> · H <sub>2</sub> O                                                                                                            | 14      |
|          | HPO <sub>4</sub> <sup>2-</sup> · H <sub>2</sub> O→ PO <sub>4</sub> <sup>3-</sup> · H <sub>2</sub> O                                                          | 12      |
| 31 (32)  | H <sub>2</sub> PO <sub>4</sub> <sup>-</sup> → HPO <sub>4</sub> <sup>2-</sup> (D <sub>2</sub> PO <sub>4</sub> <sup>-</sup> → DPO <sub>4</sub> <sup>2-</sup> ) | 11 (11) |
|          | H <sub>2</sub> PO <sub>4</sub> <sup>-</sup> · H <sub>2</sub> O→                                                                                              | 8 (9)   |
|          | →HPO <sub>4</sub> <sup>2-</sup> · H <sub>2</sub> O                                                                                                           | 13 (?)  |
|          | H <sub>2</sub> PO <sub>4</sub> <sup>-</sup> · H <sub>2</sub> O→ HPO <sub>4</sub> <sup>2-</sup> · H <sub>2</sub> O                                            | 10 (?)  |
| 33       | glucose-6-biphosphate → glucose-6-phosphate                                                                                                                  | 7       |
|          | glucose-6-biphosphate+H <sub>2</sub> O→                                                                                                                      | 3       |
| 34       | glycerol-3-biphosphate → glycerol-3-phosphate                                                                                                                | 7       |
|          | glycerol-3-biphosphate+H <sub>2</sub> O→                                                                                                                     | 1       |
| 35       | glycerol-3-biphosphate-d → glycerol-3-phosphate                                                                                                              | 7       |
|          | glycerol-3-biphosphate- <i>d</i> +H <sub>2</sub> O→                                                                                                          | 2       |

<sup>a</sup> If not explicitly stated, as written in source.

**Table S2.**  $\lambda_{harm}$  scale factors for various GGA and meta-GGA exchange–correlation functional–basis set–density fitting basis set combinations.

| Functional | Basis Set | none <sup>a</sup> | def2-SV/TZV | W06    | auto   |
|------------|-----------|-------------------|-------------|--------|--------|
| B97-D      | SVP       | 1.0277            | 1.0379      | 1.0278 | 1.0278 |
|            | SVPD      | 1.0278            | 1.0365      | 1.0279 | 1.0279 |
|            | TZVP      | 1.0277            | 1.0360      | 1.0278 | 1.0278 |
|            | TZVPD     | 1.0282            | 1.0362      | 1.0283 | 1.0283 |
|            | TZVPP     | 1.0267            | 1.0346      | 1.0268 | 1.0268 |
|            | TZVPPD    | 1.0269            | 1.0346      | 1.0269 | 1.0269 |
|            | QZVP      | 1.0274            | 1.0355      | 1.0275 | 1.0275 |
|            | QZVPD     | 1.0276            | 1.0356      | 1.0277 | 1.0277 |
|            | QZVPP     | 1.0274            | 1.0355      | 1.0275 | 1.0275 |
|            | QZVPPD    | 1.0276            | 1.0356      | 1.0277 | 1.0277 |
| BLYP       | SVP       | 1.0399            | 1.0502      | 1.0400 | 1.0402 |
|            | SVPD      | 1.0384            | 1.0469      | 1.0385 | 1.0386 |
|            | TZVP      | 1.0371            | 1.0450      | 1.0372 | 1.0371 |
|            | TZVPD     | 1.0374            | 1.0450      | 1.0374 | 1.0374 |
|            | TZVPP     | 1.0354            | 1.0428      | 1.0354 | 1.0354 |
|            | TZVPPD    | 1.0355            | 1.0426      | 1.0355 | 1.0355 |
|            | QZVP      | 1.0364            | 1.0441      | 1.0364 | 1.0364 |
|            | QZVPD     | 1.0366            | 1.0442      | 1.0366 | 1.0366 |
|            | QZVPP     | 1.0364            | 1.0441      | 1.0364 | 1.0364 |
|            | QZVPPD    | 1.0366            | 1.0442      | 1.0366 | 1.0366 |

| Functional | Basis Set | none <sup>a</sup> | def2-SV/TZV | W06    | auto   |
|------------|-----------|-------------------|-------------|--------|--------|
| BP86       | SVP       | 1.0340            | 1.0247      | 1.0341 | 1.0343 |
|            | SVPD      | 1.0341            | 1.0238      | 1.0342 | 1.0343 |
|            | TZVP      | 1.0338            | 1.0420      | 1.0339 | 1.0338 |
|            | TZVPD     | 1.0343            | 1.0423      | 1.0344 | 1.0343 |
|            | TZVPP     | 1.0325            | 1.0404      | 1.0326 | 1.0326 |
|            | TZVPPD    | 1.0327            | 1.0403      | 1.0328 | 1.0328 |
|            | QZVP      | 1.0336            | 1.0417      | 1.0337 | 1.0336 |
|            | QZVPD     | 1.0338            | 1.0418      | 1.0339 | 1.0338 |
|            | QZVPP     | 1.0336            | 1.0417      | 1.0337 | 1.0336 |
|            | QZVPPD    | 1.0338            | 1.0418      | 1.0339 | 1.0338 |
| HCTH       | SVP       | 1.0101            | 1.0002      | 1.0102 | 1.0103 |
|            | SVPD      | 1.0102            | 0.9998      | 1.0103 | 1.0104 |
|            | TZVP      | 1.0124            | 1.0063      | 1.0125 | 1.0124 |
|            | TZVPD     | 1.0129            | 1.0210      | 1.0130 | 1.0129 |
|            | TZVPP     | 1.0115            | 1.0195      | 1.0116 | 1.0115 |
|            | TZVPPD    | 1.0118            | 1.0196      | 1.0119 | 1.0118 |
|            | QZVP      | 1.0122            | 1.0211      | 1.0124 | 1.0122 |
|            | QZVPD     | 1.0125            | 1.0212      | 1.0126 | 1.0125 |
|            | QZVPP     | 1.0122            | 1.0211      | 1.0124 | 1.0122 |
|            | QZVPPD    | 1.0125            | 1.0212      | 1.0126 | 1.0125 |
| M06-L      | SVP       | 0.9957            | 0.9892      | 0.9959 | 0.9959 |
|            | SVPD      | 0.9978            | 0.9902      | 0.9979 | 0.9979 |
|            | TZVP      | 0.9964            | 1.0065      | 0.9965 | 0.9964 |
|            | TZVPD     | 0.9968            | 1.0066      | 0.9970 | 0.9969 |
|            | TZVPP     | 0.9949            | 1.0045      | 0.9950 | 0.9949 |
|            | TZVPPD    | 0.9954            | 1.0048      | 0.9955 | 0.9954 |
|            | QZVP      | 0.9944            | 1.0045      | 0.9944 | 0.9944 |
|            | QZVPD     | 0.9945            | 1.0046      | 0.9945 | 0.9945 |
|            | QZVPP     | 0.9944            | 1.0045      | 0.9944 | 0.9944 |
|            | QZVPPD    | 0.9945            | 1.0046      | 0.9945 | 0.9945 |

| <b>Functional</b> | <b>Basis Set</b> | <b>none<sup>a</sup></b> | <b>def2-SV/TZV</b> | <b>W06</b> | <b>auto</b> |
|-------------------|------------------|-------------------------|--------------------|------------|-------------|
| M06-LD3           | SVP              | 0.9957                  | 1.0063             | 0.9959     | 0.9959      |
|                   | SVPD             | 0.9978                  | 1.0078             | 0.9979     | 0.9979      |
|                   | TZVP             | 0.9964                  | 1.0065             | 0.9965     | 0.9964      |
|                   | TZVPD            | 0.9968                  | 1.0066             | 0.9970     | 0.9969      |
|                   | TZVPP            | 0.9949                  | 1.0045             | 0.9950     | 0.9949      |
|                   | TZVPPD           | 0.9954                  | 1.0048             | 0.9955     | 0.9954      |
|                   | QZVP             | 0.9944                  | 1.0045             | 0.9944     | 0.9944      |
|                   | QZVPD            | 0.9945                  | 1.0046             | 0.9945     | 0.9945      |
|                   | QZVPP            | 0.9944                  | 1.0045             | 0.9944     | 0.9944      |
|                   | QZVPPD           | 0.9945                  | 1.0046             | 0.9945     | 0.9945      |
| M11-L             | SVP              | 0.9988                  | 0.9934             | 0.9990     | 0.9990      |
|                   | SVPD             | 1.0008                  | 0.9952             | 1.0009     | 1.0009      |
|                   | TZVP             | 0.9973                  | 1.0082             | 0.9974     | 0.9973      |
|                   | TZVPD            | 0.9979                  | 1.0085             | 0.9981     | 0.9979      |
|                   | TZVPP            | 0.9983                  | 1.0089             | 0.9985     | 0.9983      |
|                   | TZVPPD           | 0.9984                  | 1.0088             | 0.9985     | 0.9984      |
|                   | QZVP             | 0.9977                  | 1.0084             | 0.9978     | 0.9977      |
|                   | QZVPD            | 0.9982                  | 1.0089             | 0.9983     | 0.9982      |
|                   | QZVPP            | 0.9977                  | 1.0084             | 0.9978     | 0.9977      |
|                   | QZVPPD           | 0.9982                  | 1.0089             | 0.9983     | 0.9982      |
| MN12-L            | SVP              | 0.9839                  | 0.9820             | 0.9840     | 0.9841      |
|                   | SVPD             | 0.9858                  | 0.9838             | 0.9859     | 0.9860      |
|                   | TZVP             | 0.9874                  | 0.9981             | 0.9875     | 0.9874      |
|                   | TZVPD            | 0.9876                  | 0.9980             | 0.9878     | 0.9876      |
|                   | TZVPP            | 0.9869                  | 0.9969             | 0.9870     | 0.9869      |
|                   | TZVPPD           | 0.9869                  | 0.9967             | 0.9870     | 0.9869      |
|                   | QZVP             | 0.9871                  | 0.9971             | 0.9873     | 0.9872      |
|                   | QZVPD            | 0.9873                  | 0.9972             | 0.9874     | 0.9874      |
|                   | QZVPP            | 0.9871                  | 0.9971             | 0.9873     | 0.9872      |
|                   | QZVPPD           | 0.9873                  | 0.9972             | 0.9874     | 0.9874      |

| <b>Functional</b> | <b>Basis Set</b> | <b>none<sup>a</sup></b> | <b>def2-SV/TZV</b> | <b>W06</b> | <b>auto</b> |
|-------------------|------------------|-------------------------|--------------------|------------|-------------|
| MN15-L            | SVP              | 0.9908                  | 1.0012             | 0.9909     | 0.9910      |
|                   | SVPD             | 0.9933                  | 1.0028             | 0.9934     | 0.9935      |
|                   | TZVP             | 0.9976                  | 1.0072             | 0.9978     | 0.9976      |
|                   | TZVPD            | 0.9984                  | 1.0076             | 0.9985     | 0.9984      |
|                   | TZVPP            | 0.9967                  | 1.0055             | 0.9968     | 0.9967      |
|                   | TZVPPD           | 0.9971                  | 1.0058             | 0.9972     | 0.9971      |
|                   | QZVP             | 0.9982                  | 1.0083             | 0.9983     | 0.9982      |
|                   | QZVPD            | 0.9983                  | 1.0084             | 0.9985     | 0.9983      |
|                   | QZVPP            | 0.9982                  | 1.0083             | 0.9983     | 0.9982      |
|                   | QZVPPD           | 0.9983                  | 1.0084             | 0.9985     | 0.9983      |
| mPWPW91           | SVP              | 1.0291                  | 1.0390             | 1.0292     | 1.0292      |
|                   | SVPD             | 1.0289                  | 1.0375             | 1.0290     | 1.0290      |
|                   | TZVP             | 1.0288                  | 1.0371             | 1.0289     | 1.0289      |
|                   | TZVPD            | 1.0293                  | 1.0374             | 1.0294     | 1.0294      |
|                   | TZVPP            | 1.0277                  | 1.0356             | 1.0277     | 1.0277      |
|                   | TZVPPD           | 1.0278                  | 1.0356             | 1.0279     | 1.0279      |
|                   | QZVP             | 1.0286                  | 1.0369             | 1.0287     | 1.0287      |
|                   | QZVPD            | 1.0289                  | 1.0370             | 1.0289     | 1.0289      |
|                   | QZVPP            | 1.0286                  | 1.0369             | 1.0287     | 1.0287      |
|                   | QZVPPD           | 1.0289                  | 1.0370             | 1.0289     | 1.0289      |
| N12               | SVP              | 1.0041                  | 0.9960             | 1.0042     | 1.0044      |
|                   | SVPD             | 1.0033                  | 0.9945             | 1.0034     | 1.0035      |
|                   | TZVP             | 1.0026                  | 1.0104             | 1.0027     | 1.0026      |
|                   | TZVPD            | 1.0030                  | 1.0105             | 1.0031     | 1.0030      |
|                   | TZVPP            | 1.0012                  | 1.0085             | 1.0012     | 1.0012      |
|                   | TZVPPD           | 1.0013                  | 1.0085             | 1.0014     | 1.0013      |
|                   | QZVP             | 1.0017                  | 1.0094             | 1.0017     | 1.0017      |
|                   | QZVPD            | 1.0020                  | 1.0094             | 1.0020     | 1.0020      |
|                   | QZVPP            | 1.0017                  | 1.0094             | 1.0017     | 1.0017      |
|                   | QZVPPD           | 1.0020                  | 1.0094             | 1.0020     | 1.0020      |

| Functional          | Basis Set | none <sup>a</sup> | def2-SV/TZV | W06    | auto   |
|---------------------|-----------|-------------------|-------------|--------|--------|
| OLYP                | SVP       | 1.0200            | 1.0303      | 1.0201 | 1.0202 |
|                     | SVPD      | 1.0197            | 1.0284      | 1.0199 | 1.0199 |
|                     | TZVP      | 1.0212            | 1.0297      | 1.0213 | 1.0212 |
|                     | TZVPD     | 1.0216            | 1.0300      | 1.0218 | 1.0217 |
|                     | TZVPP     | 1.0205            | 1.0287      | 1.0206 | 1.0205 |
|                     | TZVPPD    | 1.0207            | 1.0288      | 1.0208 | 1.0207 |
|                     | QZVP      | 1.0211            | 1.0301      | 1.0213 | 1.0211 |
|                     | QZVPD     | 1.0213            | 1.0302      | 1.0215 | 1.0213 |
|                     | QZVPP     | 1.0211            | 1.0301      | 1.0213 | 1.0211 |
|                     | QZVPPD    | 1.0213            | 1.0302      | 1.0215 | 1.0213 |
| PBE                 | SVP       | 1.0303            | 1.0213      | 1.0304 | 1.0305 |
|                     | SVPD      | 1.0303            | 1.0203      | 1.0304 | 1.0304 |
|                     | TZVP      | 1.0307            | 1.0390      | 1.0308 | 1.0307 |
|                     | TZVPD     | 1.0312            | 1.0392      | 1.0313 | 1.0312 |
|                     | TZVPP     | 1.0296            | 1.0374      | 1.0296 | 1.0296 |
|                     | TZVPPD    | 1.0298            | 1.0374      | 1.0298 | 1.0298 |
|                     | QZVP      | 1.0306            | 1.0390      | 1.0307 | 1.0306 |
|                     | QZVPD     | 1.0308            | 1.0390      | 1.0309 | 1.0308 |
|                     | QZVPP     | 1.0306            | 1.0390      | 1.0307 | 1.0306 |
|                     | QZVPPD    | 1.0308            | 1.0390      | 1.0309 | 1.0308 |
| PBE <sub>D3BJ</sub> | SVP       | 1.0303            | 1.0402      | 1.0304 | 1.0304 |
|                     | SVPD      | 1.0302            | 1.0387      | 1.0303 | 1.0303 |
|                     | TZVP      | 1.0306            | 1.0389      | 1.0308 | 1.0308 |
|                     | TZVPD     | 1.0311            | 1.0392      | 1.0313 | 1.0313 |
|                     | TZVPP     | 1.0295            | 1.0374      | 1.0296 | 1.0296 |
|                     | TZVPPD    | 1.0297            | 1.0374      | 1.0298 | 1.0298 |
|                     | QZVP      | 1.0306            | 1.0389      | 1.0307 | 1.0307 |
|                     | QZVPD     | 1.0308            | 1.0390      | 1.0309 | 1.0309 |
|                     | QZVPP     | 1.0306            | 1.0389      | 1.0307 | 1.0307 |
|                     | QZVPPD    | 1.0308            | 1.0390      | 1.0309 | 1.0309 |

| <b>Functional</b> | <b>Basis Set</b> | <b>none<sup>a</sup></b> | <b>def2-SV/TZV</b> | <b>W06</b> | <b>auto</b> |
|-------------------|------------------|-------------------------|--------------------|------------|-------------|
| revTPSS           | SVP              | 1.0189                  | 1.0083             | 1.0190     | 1.0192      |
|                   | SVPD             | 1.0193                  | 1.0081             | 1.0194     | 1.0195      |
|                   | TZVP             | 1.0201                  | 1.0294             | 1.0202     | 1.0201      |
|                   | TZVPD            | 1.0204                  | 1.0296             | 1.0206     | 1.0204      |
|                   | TZVPP            | 1.0194                  | 1.0285             | 1.0194     | 1.0194      |
|                   | TZVPPD           | 1.0194                  | 1.0285             | 1.0195     | 1.0195      |
|                   | QZVP             | 1.0197                  | 1.0290             | 1.0198     | 1.0197      |
|                   | QZVPD            | 1.0198                  | 1.0290             | 1.0199     | 1.0199      |
|                   | QZVPP            | 1.0197                  | 1.0290             | 1.0198     | 1.0197      |
|                   | QZVPPD           | 1.0198                  | 1.0290             | 1.0199     | 1.0199      |
| SOGGA11           | SVP              | 1.0182                  | 1.0281             | 1.0184     | 1.0185      |
|                   | SVPD             | 1.0114                  | 1.0202             | 1.0116     | 1.0116      |
|                   | TZVP             | 1.0195                  | 1.0273             | 1.0196     | 1.0195      |
|                   | TZVPD            | 1.0197                  | 1.0269             | 1.0198     | 1.0197      |
|                   | TZVPP            | 1.0206                  | 1.0282             | 1.0206     | 1.0206      |
|                   | TZVPPD           | 1.0208                  | 1.0272             | 1.0221     | 1.0208      |
|                   | QZVP             | 1.0189                  | 1.0280             | 1.0192     | 1.0189      |
|                   | QZVPD            | 1.0182                  | 1.0269             | 1.0189     | 1.0182      |
|                   | QZVPP            | 1.0189                  | 1.0280             | 1.0192     | 1.0189      |
|                   | QZVPPD           | 1.0182                  | 1.0269             | 1.0189     | 1.0182      |
| TPSS              | SVP              | 1.0188                  | 1.0086             | 1.0190     | 1.0191      |
|                   | SVPD             | 1.0191                  | 1.0083             | 1.0192     | 1.0193      |
|                   | TZVP             | 1.0193                  | 1.0284             | 1.0194     | 1.0193      |
|                   | TZVPD            | 1.0198                  | 1.0286             | 1.0199     | 1.0198      |
|                   | TZVPP            | 1.0188                  | 1.0277             | 1.0189     | 1.0188      |
|                   | TZVPPD           | 1.0189                  | 1.0276             | 1.0190     | 1.0189      |
|                   | QZVP             | 1.0192                  | 1.0282             | 1.0193     | 1.0192      |
|                   | QZVPD            | 1.0194                  | 1.0282             | 1.0194     | 1.0194      |
|                   | QZVPP            | 1.0192                  | 1.0282             | 1.0193     | 1.0192      |
|                   | QZVPPD           | 1.0194                  | 1.0282             | 1.0194     | 1.0194      |



| Functional           | Basis Set | none <sup>a</sup> | def2-SV/TZV | W06    | auto   |
|----------------------|-----------|-------------------|-------------|--------|--------|
| TPSS <sub>D3BJ</sub> | SVP       | 1.0188            | 1.0086      | 1.0189 | 1.0190 |
|                      | SVPD      | 1.0191            | 1.0083      | 1.0192 | 1.0193 |
|                      | TZVP      | 1.0193            | 1.0282      | 1.0194 | 1.0193 |
|                      | TZVPD     | 1.0197            | 1.0286      | 1.0198 | 1.0197 |
|                      | TZVPP     | 1.0187            | 1.0276      | 1.0188 | 1.0188 |
|                      | TZVPPD    | 1.0189            | 1.0276      | 1.0190 | 1.0189 |
|                      | QZVP      | 1.0192            | 1.0281      | 1.0192 | 1.0192 |
|                      | QZVPD     | 1.0193            | 1.0282      | 1.0194 | 1.0193 |
|                      | QZVPP     | 1.0192            | 1.0281      | 1.0192 | 1.0192 |
|                      | QZVPPD    | 1.0193            | 1.0282      | 1.0194 | 1.0193 |
| VSXC                 | SVP       | 1.0049            | 1.0146      | 1.0050 | 1.0050 |
|                      | SVPD      | 1.0060            | 1.0143      | 1.0061 | 1.0061 |
|                      | TZVP      | 1.0063            | 1.0143      | 1.0064 | 1.0064 |
|                      | TZVPD     | 1.0070            | 1.0148      | 1.0072 | 1.0072 |
|                      | TZVPP     | 1.0052            | 1.0130      | 1.0053 | 1.0053 |
|                      | TZVPPD    | 1.0055            | 1.0132      | 1.0057 | 1.0057 |
|                      | QZVP      | 1.0064            | 1.0150      | 1.0065 | 1.0065 |
|                      | QZVPD     | 1.0066            | 1.0150      | 1.0067 | 1.0067 |
|                      | QZVPP     | 1.0064            | 1.0150      | 1.0065 | 1.0065 |
|                      | QZVPPD    | 1.0066            | 1.0150      | 1.0067 | 1.0067 |
| XLYP                 | SVP       | 1.0399            | 1.0501      | 1.0400 | 1.0400 |
|                      | SVPD      | 1.0382            | 1.0467      | 1.0383 | 1.0383 |
|                      | TZVP      | 1.0370            | 1.0449      | 1.0370 | 1.0370 |
|                      | TZVPD     | 1.0373            | 1.0448      | 1.0373 | 1.0373 |
|                      | TZVPP     | 1.0353            | 1.0426      | 1.0353 | 1.0353 |
|                      | TZVPPD    | 1.0353            | 1.0425      | 1.0354 | 1.0354 |
|                      | QZVP      | 1.0363            | 1.0440      | 1.0363 | 1.0363 |
|                      | QZVPD     | 1.0365            | 1.0440      | 1.0365 | 1.0365 |
|                      | QZVPP     | 1.0363            | 1.0440      | 1.0363 | 1.0363 |
|                      | QZVPPD    | 1.0365            | 1.0440      | 1.0365 | 1.0365 |

| Functional | Basis Set | none <sup>a</sup> | def2-SV/TZV | W06    | auto   |
|------------|-----------|-------------------|-------------|--------|--------|
| τHCTH      | SVP       | 1.0151            | 1.0057      | 1.0152 | 1.0153 |
|            | SVPD      | 1.0158            | 1.0056      | 1.0159 | 1.0160 |
|            | TZVP      | 1.0156            | 1.0237      | 1.0157 | 1.0156 |
|            | TZVPD     | 1.0161            | 1.0241      | 1.0163 | 1.0162 |
|            | TZVPP     | 1.0150            | 1.0230      | 1.0150 | 1.0150 |
|            | TZVPPD    | 1.0151            | 1.0230      | 1.0152 | 1.0151 |
|            | QZVP      | 1.0154            | 1.0241      | 1.0155 | 1.0154 |
|            | QZVPD     | 1.0156            | 1.0241      | 1.0157 | 1.0156 |
|            | QZVPP     | 1.0154            | 1.0241      | 1.0155 | 1.0154 |
|            | QZVPPD    | 1.0156            | 1.0241      | 1.0157 | 1.0156 |

<sup>a</sup> Not using any density fitting.

**Table S3.** Root-mean-square deviations (RMSD, cm<sup>-1</sup>) of  $\lambda_{\text{harm}}$  for various GGA and meta-GGA exchange–correlation functional–basis set–density fitting basis set combinations.

| Functional | Basis Set | none <sup>a</sup> | def2-SV/TZV | W06   | auto  |
|------------|-----------|-------------------|-------------|-------|-------|
| B97-D      | SVP       | 39.98             | 62.77       | 39.93 | 39.93 |
|            | SVPD      | 36.91             | 60.82       | 36.91 | 36.91 |
|            | TZVP      | 28.07             | 55.05       | 28.11 | 28.11 |
|            | TZVPD     | 26.42             | 55.02       | 26.53 | 26.53 |
|            | TZVPP     | 27.21             | 53.98       | 27.25 | 27.25 |
|            | TZVPPD    | 26.20             | 53.62       | 26.28 | 26.28 |
|            | QZVP      | 26.13             | 54.11       | 26.20 | 26.20 |
|            | QZVPD     | 25.89             | 54.09       | 25.98 | 25.98 |
|            | QZVPP     | 26.13             | 54.11       | 26.21 | 26.21 |
|            | QZVPPD    | 25.89             | 54.09       | 25.98 | 25.98 |
| BLYP       | SVP       | 40.66             | 72.00       | 40.65 | 40.99 |
|            | SVPD      | 36.88             | 67.57       | 36.88 | 36.90 |
|            | TZVP      | 30.94             | 66.37       | 31.07 | 30.96 |
|            | TZVPD     | 29.17             | 65.82       | 29.38 | 29.19 |
|            | TZVPP     | 27.92             | 63.87       | 28.04 | 27.94 |
|            | TZVPPD    | 27.32             | 63.47       | 27.50 | 27.34 |
|            | QZVP      | 26.67             | 63.61       | 26.87 | 26.67 |
|            | QZVPD     | 26.70             | 63.60       | 26.91 | 26.71 |
|            | QZVPP     | 26.67             | 63.61       | 26.86 | 26.67 |
|            | QZVPPD    | 26.70             | 63.60       | 26.91 | 26.71 |

| Functional | Basis Set | none <sup>a</sup> | def2-SV/TZV | W06   | auto  |
|------------|-----------|-------------------|-------------|-------|-------|
| BP86       | SVP       | 38.26             | 143.84      | 38.23 | 38.33 |
|            | SVPD      | 35.80             | 156.11      | 35.78 | 35.72 |
|            | TZVP      | 25.51             | 55.39       | 25.60 | 25.53 |
|            | TZVPD     | 24.45             | 55.38       | 24.60 | 24.47 |
|            | TZVPP     | 23.56             | 53.71       | 23.65 | 23.57 |
|            | TZVPPD    | 23.10             | 53.44       | 23.23 | 23.12 |
|            | QZVP      | 22.51             | 53.53       | 22.66 | 22.52 |
|            | QZVPD     | 22.51             | 53.56       | 22.66 | 22.51 |
|            | QZVPP     | 22.51             | 53.53       | 22.66 | 22.51 |
|            | QZVPPD    | 22.51             | 53.56       | 22.66 | 22.51 |
| HCTH       | SVP       | 44.76             | 126.79      | 44.72 | 44.66 |
|            | SVPD      | 42.75             | 149.91      | 42.75 | 42.60 |
|            | TZVP      | 29.31             | 150.77      | 29.32 | 29.32 |
|            | TZVPD     | 27.21             | 47.39       | 27.27 | 27.22 |
|            | TZVPP     | 28.08             | 46.00       | 28.13 | 28.08 |
|            | TZVPPD    | 27.22             | 46.18       | 27.29 | 27.22 |
|            | QZVP      | 26.80             | 45.95       | 26.90 | 26.79 |
|            | QZVPD     | 26.70             | 46.09       | 26.80 | 26.69 |
|            | QZVPP     | 26.80             | 45.95       | 26.90 | 26.80 |
|            | QZVPPD    | 26.70             | 46.09       | 26.80 | 26.69 |
| M06-L      | SVP       | 42.66             | 123.06      | 42.63 | 42.53 |
|            | SVPD      | 41.36             | 151.50      | 41.36 | 41.22 |
|            | TZVP      | 32.22             | 47.66       | 32.27 | 32.23 |
|            | TZVPD     | 32.64             | 48.50       | 32.73 | 32.65 |
|            | TZVPP     | 31.34             | 45.10       | 31.31 | 31.34 |
|            | TZVPPD    | 30.85             | 44.68       | 30.85 | 30.86 |
|            | QZVP      | 29.05             | 45.07       | 29.01 | 29.05 |
|            | QZVPD     | 28.24             | 44.34       | 28.18 | 28.24 |
|            | QZVPP     | 29.05             | 45.07       | 29.01 | 29.04 |
|            | QZVPPD    | 28.24             | 44.34       | 28.18 | 28.24 |

| Functional | Basis Set | none <sup>a</sup> | def2-SV/TZV | W06   | auto  |
|------------|-----------|-------------------|-------------|-------|-------|
| M06-LD3    | SVP       | 42.66             | 53.92       | 42.63 | 42.53 |
|            | SVPD      | 41.36             | 55.02       | 41.37 | 41.23 |
|            | TZVP      | 32.22             | 47.66       | 32.27 | 32.23 |
|            | TZVPD     | 32.64             | 48.49       | 32.73 | 32.65 |
|            | TZVPP     | 31.34             | 45.10       | 31.31 | 31.35 |
|            | TZVPPD    | 30.86             | 44.68       | 30.86 | 30.86 |
|            | QZVP      | 29.05             | 45.07       | 29.01 | 29.05 |
|            | QZVPD     | 28.25             | 44.34       | 28.19 | 28.25 |
|            | QZVPP     | 29.05             | 45.07       | 29.01 | 29.05 |
|            | QZVPPD    | 28.25             | 44.34       | 28.19 | 28.25 |
| M11-L      | SVP       | 72.68             | 141.10      | 72.59 | 72.35 |
|            | SVPD      | 71.45             | 176.09      | 71.42 | 71.14 |
|            | TZVP      | 62.35             | 65.26       | 62.27 | 62.35 |
|            | TZVPD     | 60.94             | 64.74       | 60.88 | 60.93 |
|            | TZVPP     | 64.11             | 66.75       | 64.06 | 64.10 |
|            | TZVPPD    | 63.54             | 66.45       | 63.50 | 63.53 |
|            | QZVP      | 59.34             | 62.84       | 59.24 | 59.34 |
|            | QZVPD     | 60.18             | 63.52       | 60.09 | 60.18 |
|            | QZVPP     | 59.34             | 62.84       | 59.24 | 59.34 |
|            | QZVPPD    | 60.18             | 63.52       | 60.09 | 60.18 |
| MN12-L     | SVP       | 46.49             | 126.54      | 46.42 | 46.31 |
|            | SVPD      | 44.33             | 156.15      | 44.29 | 44.06 |
|            | TZVP      | 40.11             | 57.38       | 40.10 | 40.12 |
|            | TZVPD     | 39.24             | 57.51       | 39.27 | 39.24 |
|            | TZVPP     | 41.14             | 56.55       | 41.15 | 41.14 |
|            | TZVPPD    | 40.71             | 56.20       | 40.72 | 40.70 |
|            | QZVP      | 41.67             | 57.32       | 41.67 | 41.67 |
|            | QZVPD     | 41.23             | 56.91       | 41.22 | 41.22 |
|            | QZVPP     | 41.67             | 57.32       | 41.67 | 41.67 |
|            | QZVPPD    | 41.23             | 56.91       | 41.22 | 41.22 |

| <b>Functional</b> | <b>Basis Set</b> | <b>none<sup>a</sup></b> | <b>def2-SV/TZV</b> | <b>W06</b> | <b>auto</b> |
|-------------------|------------------|-------------------------|--------------------|------------|-------------|
| MN15-L            | SVP              | 47.20                   | 55.84              | 47.08      | 46.91       |
|                   | SVPD             | 42.70                   | 56.14              | 42.66      | 42.45       |
|                   | TZVP             | 40.18                   | 51.11              | 40.14      | 40.18       |
|                   | TZVPD            | 38.41                   | 50.74              | 38.41      | 38.40       |
|                   | TZVPP            | 40.01                   | 49.57              | 39.97      | 40.00       |
|                   | TZVPPD           | 38.69                   | 49.33              | 38.68      | 38.68       |
|                   | QZVP             | 39.33                   | 50.38              | 39.30      | 39.33       |
|                   | QZVPD            | 39.29                   | 50.40              | 39.25      | 39.28       |
|                   | QZVPP            | 39.33                   | 50.38              | 39.30      | 39.33       |
|                   | QZVPPD           | 39.29                   | 50.40              | 39.25      | 39.28       |
| mPWPW91           | SVP              | 38.75                   | 63.93              | 38.73      | 38.73       |
|                   | SVPD             | 36.23                   | 61.57              | 36.23      | 36.23       |
|                   | TZVP             | 25.21                   | 54.30              | 25.30      | 25.30       |
|                   | TZVPD            | 23.82                   | 54.23              | 23.97      | 23.97       |
|                   | TZVPP            | 23.32                   | 52.82              | 23.41      | 23.41       |
|                   | TZVPPD           | 22.79                   | 52.58              | 22.92      | 22.92       |
|                   | QZVP             | 22.09                   | 52.49              | 22.26      | 22.26       |
|                   | QZVPD            | 22.10                   | 52.56              | 22.27      | 22.27       |
|                   | QZVPP            | 22.09                   | 52.49              | 22.26      | 22.26       |
|                   | QZVPPD           | 22.10                   | 52.56              | 22.27      | 22.27       |
| N12               | SVP              | 39.55                   | 126.13             | 39.48      | 39.34       |
|                   | SVPD             | 41.91                   | 140.71             | 41.81      | 41.58       |
|                   | TZVP             | 25.04                   | 48.97              | 25.02      | 25.05       |
|                   | TZVPD            | 23.06                   | 49.24              | 23.07      | 23.07       |
|                   | TZVPP            | 24.53                   | 47.50              | 24.54      | 24.53       |
|                   | TZVPPD           | 24.41                   | 47.97              | 24.39      | 24.40       |
|                   | QZVP             | 24.32                   | 47.93              | 24.33      | 24.32       |
|                   | QZVPD            | 24.45                   | 48.21              | 24.45      | 24.44       |
|                   | QZVPP            | 24.32                   | 47.93              | 24.33      | 24.32       |
|                   | QZVPPD           | 24.45                   | 48.21              | 24.45      | 24.44       |

| Functional          | Basis Set | none <sup>a</sup> | def2-SV/TZV | W06   | auto  |
|---------------------|-----------|-------------------|-------------|-------|-------|
| OLYP                | SVP       | 38.88             | 61.13       | 38.85 | 38.90 |
|                     | SVPD      | 36.03             | 60.04       | 36.05 | 35.90 |
|                     | TZVP      | 26.52             | 49.92       | 26.54 | 26.54 |
|                     | TZVPD     | 21.69             | 48.49       | 21.81 | 21.70 |
|                     | TZVPP     | 23.23             | 47.51       | 23.29 | 23.23 |
|                     | TZVPPD    | 21.45             | 47.31       | 21.57 | 21.45 |
|                     | QZVP      | 21.23             | 47.26       | 21.38 | 21.22 |
|                     | QZVPD     | 20.89             | 47.34       | 21.05 | 20.89 |
|                     | QZVPP     | 21.23             | 47.26       | 21.38 | 21.22 |
|                     | QZVPPD    | 20.89             | 47.34       | 21.05 | 20.89 |
| PBE                 | SVP       | 40.53             | 141.69      | 40.51 | 40.56 |
|                     | SVPD      | 38.24             | 154.72      | 38.23 | 38.17 |
|                     | TZVP      | 26.50             | 53.49       | 26.58 | 26.52 |
|                     | TZVPD     | 24.91             | 53.30       | 25.05 | 24.93 |
|                     | TZVPP     | 24.41             | 51.75       | 24.49 | 24.42 |
|                     | TZVPPD    | 23.88             | 51.59       | 23.99 | 23.89 |
|                     | QZVP      | 23.21             | 51.42       | 23.36 | 23.21 |
|                     | QZVPD     | 23.25             | 51.53       | 23.40 | 23.25 |
|                     | QZVPP     | 23.21             | 51.42       | 23.36 | 23.21 |
|                     | QZVPPD    | 23.25             | 51.53       | 23.40 | 23.25 |
| PBE <sub>D3BJ</sub> | SVP       | 40.57             | 63.66       | 40.55 | 40.55 |
|                     | SVPD      | 38.25             | 61.46       | 38.25 | 38.25 |
|                     | TZVP      | 26.53             | 53.53       | 26.62 | 26.62 |
|                     | TZVPD     | 24.94             | 53.33       | 25.07 | 25.07 |
|                     | TZVPP     | 24.43             | 51.78       | 24.51 | 24.51 |
|                     | TZVPPD    | 23.90             | 51.62       | 24.01 | 24.01 |
|                     | QZVP      | 23.23             | 51.45       | 23.38 | 23.38 |
|                     | QZVPD     | 23.27             | 51.56       | 23.42 | 23.42 |
|                     | QZVPP     | 23.23             | 51.45       | 23.38 | 23.38 |
|                     | QZVPPD    | 23.27             | 51.56       | 23.42 | 23.42 |

| Functional | Basis Set | none <sup>a</sup> | def2-SV/TZV | W06   | auto  |
|------------|-----------|-------------------|-------------|-------|-------|
| rev-TPSS   | SVP       | 40.47             | 143.52      | 40.51 | 40.81 |
|            | SVPD      | 32.43             | 156.66      | 32.51 | 32.54 |
|            | TZVP      | 30.44             | 62.15       | 30.55 | 30.46 |
|            | TZVPD     | 29.34             | 61.68       | 29.51 | 29.36 |
|            | TZVPP     | 28.82             | 60.78       | 28.91 | 28.84 |
|            | TZVPPD    | 27.99             | 60.05       | 28.13 | 28.01 |
|            | QZVP      | 28.33             | 60.96       | 28.45 | 28.34 |
|            | QZVPD     | 28.14             | 60.79       | 28.27 | 28.15 |
|            | QZVPP     | 28.33             | 60.96       | 28.46 | 28.34 |
|            | QZVPPD    | 28.14             | 60.79       | 28.27 | 28.15 |
| SOGGA11    | SVP       | 50.77             | 61.90       | 50.74 | 50.52 |
|            | SVPD      | 49.21             | 66.28       | 49.18 | 48.93 |
|            | TZVP      | 29.40             | 51.54       | 29.42 | 29.41 |
|            | TZVPD     | 30.69             | 49.57       | 30.74 | 30.69 |
|            | TZVPP     | 35.84             | 51.15       | 35.91 | 35.83 |
|            | TZVPPD    | 38.10             | 48.32       | 41.48 | 38.00 |
|            | QZVP      | 41.52             | 54.76       | 41.71 | 41.52 |
|            | QZVPD     | 60.36             | 67.08       | 59.41 | 60.35 |
|            | QZVPP     | 41.52             | 54.76       | 41.71 | 41.51 |
|            | QZVPPD    | 60.36             | 67.08       | 59.41 | 60.34 |
| TPSS       | SVP       | 37.64             | 140.89      | 37.68 | 37.98 |
|            | SVPD      | 31.49             | 154.85      | 31.56 | 31.60 |
|            | TZVP      | 26.27             | 58.76       | 26.39 | 26.28 |
|            | TZVPD     | 25.06             | 58.47       | 25.23 | 25.09 |
|            | TZVPP     | 24.68             | 57.58       | 24.78 | 24.70 |
|            | TZVPPD    | 23.99             | 57.07       | 24.14 | 24.01 |
|            | QZVP      | 24.08             | 57.74       | 24.24 | 24.08 |
|            | QZVPD     | 23.97             | 57.66       | 24.13 | 23.97 |
|            | QZVPP     | 24.08             | 57.74       | 24.24 | 24.08 |
|            | QZVPPD    | 23.97             | 57.66       | 24.13 | 23.98 |



| Functional           | Basis Set | none <sup>a</sup> | def2-SV/TZV | W06   | auto  |
|----------------------|-----------|-------------------|-------------|-------|-------|
| TPSS <sub>D3BJ</sub> | SVP       | 37.66             | 141.01      | 37.70 | 37.99 |
|                      | SVPD      | 31.48             | 154.95      | 31.55 | 31.60 |
|                      | TZVP      | 23.97             | 57.68       | 24.13 | 23.97 |
|                      | TZVPD     | 25.06             | 58.49       | 25.24 | 25.09 |
|                      | TZVPP     | 24.68             | 57.61       | 24.78 | 24.70 |
|                      | TZVPPD    | 23.99             | 57.09       | 24.14 | 24.01 |
|                      | QZVP      | 24.08             | 57.76       | 24.24 | 24.08 |
|                      | QZVPD     | 23.97             | 57.68       | 24.13 | 23.97 |
|                      | QZVPP     | 24.08             | 57.76       | 24.24 | 24.08 |
|                      | QZVPPD    | 23.97             | 57.68       | 24.13 | 23.97 |
| VSXC                 | SVP       | 39.19             | 58.66       | 39.18 | 39.18 |
|                      | SVPD      | 38.27             | 59.69       | 38.29 | 38.29 |
|                      | TZVP      | 26.93             | 50.88       | 26.98 | 26.98 |
|                      | TZVPD     | 24.91             | 50.86       | 25.01 | 25.01 |
|                      | TZVPP     | 24.98             | 49.34       | 25.05 | 25.05 |
|                      | TZVPPD    | 24.41             | 49.54       | 24.51 | 24.51 |
|                      | QZVP      | 23.62             | 49.30       | 23.74 | 23.74 |
|                      | QZVPD     | 23.53             | 49.40       | 23.66 | 23.66 |
|                      | QZVPP     | 23.62             | 49.30       | 23.74 | 23.74 |
|                      | QZVPPD    | 23.53             | 49.40       | 23.66 | 23.66 |
| XLYP                 | SVP       | 41.01             | 72.29       | 41.00 | 41.00 |
|                      | SVPD      | 37.22             | 67.79       | 37.22 | 37.22 |
|                      | TZVP      | 30.99             | 66.29       | 31.12 | 31.12 |
|                      | TZVPD     | 29.04             | 65.68       | 29.25 | 29.25 |
|                      | TZVPP     | 27.84             | 63.73       | 27.96 | 27.96 |
|                      | TZVPPD    | 27.20             | 63.35       | 27.38 | 27.38 |
|                      | QZVP      | 26.51             | 63.44       | 26.71 | 26.71 |
|                      | QZVPD     | 26.56             | 63.45       | 26.77 | 26.77 |
|                      | QZVPP     | 26.51             | 63.44       | 26.71 | 26.71 |
|                      | QZVPPD    | 26.56             | 63.45       | 26.77 | 26.77 |

| <b>Functional</b> | <b>Basis Set</b> | <b>none<sup>a</sup></b> | <b>def2-SV/TZV</b> | <b>W06</b> | <b>auto</b> |
|-------------------|------------------|-------------------------|--------------------|------------|-------------|
| τHCTH             | SVP              | 40.11                   | 131.06             | 40.07      | 40.08       |
|                   | SVPD             | 37.23                   | 153.14             | 37.23      | 37.09       |
|                   | TZVP             | 26.55                   | 49.04              | 26.59      | 26.57       |
|                   | TZVPD            | 25.24                   | 49.30              | 25.33      | 25.25       |
|                   | TZVPP            | 25.64                   | 48.55              | 25.70      | 25.65       |
|                   | TZVPPD           | 25.02                   | 48.38              | 25.10      | 25.02       |
|                   | QZVP             | 24.14                   | 49.30              | 24.24      | 24.15       |
|                   | QZVPD            | 24.02                   | 49.30              | 24.12      | 24.02       |
|                   | QZVPP            | 24.14                   | 49.30              | 24.24      | 24.14       |
|                   | QZVPPD           | 24.02                   | 49.30              | 24.12      | 24.02       |

<sup>a</sup> Not using any density fitting.

**Table S4.**  $\lambda_{ZPE}$  scale factors for various GGA and meta-GGA exchange–correlation functional–basis set–density fitting basis set combinations.

| Functional | Basis Set | none <sup>a</sup> | def2-SV/TZV | W06    | auto   |
|------------|-----------|-------------------|-------------|--------|--------|
| B97-D      | SVP       | 1.0148            | 1.0259      | 1.0150 | 1.0150 |
|            | SVPD      | 1.0172            | 1.0280      | 1.0174 | 1.0174 |
|            | TZVP      | 1.0139            | 1.0237      | 1.0141 | 1.0141 |
|            | TZVPD     | 1.0143            | 1.0239      | 1.0144 | 1.0144 |
|            | TZVPP     | 1.0130            | 1.0224      | 1.0131 | 1.0131 |
|            | TZVPPD    | 1.0132            | 1.0226      | 1.0133 | 1.0133 |
|            | QZVP      | 1.0136            | 1.0233      | 1.0137 | 1.0137 |
|            | QZVPD     | 1.0138            | 1.0234      | 1.0139 | 1.0139 |
|            | QZVPP     | 1.0136            | 1.0233      | 1.0137 | 1.0137 |
|            | QZVPPD    | 1.0138            | 1.0234      | 1.0139 | 1.0139 |
| BLYP       | SVP       | 1.0236            | 1.0346      | 1.0237 | 1.0237 |
|            | SVPD      | 1.0253            | 1.0357      | 1.0254 | 1.0255 |
|            | TZVP      | 1.0198            | 1.0292      | 1.0199 | 1.0198 |
|            | TZVPD     | 1.0200            | 1.0292      | 1.0200 | 1.0200 |
|            | TZVPP     | 1.0182            | 1.0271      | 1.0183 | 1.0183 |
|            | TZVPPD    | 1.0184            | 1.0272      | 1.0185 | 1.0185 |
|            | QZVP      | 1.0192            | 1.0284      | 1.0193 | 1.0192 |
|            | QZVPD     | 1.0194            | 1.0285      | 1.0195 | 1.0194 |
|            | QZVPP     | 1.0192            | 1.0284      | 1.0193 | 1.0192 |
|            | QZVPPD    | 1.0194            | 1.0285      | 1.0195 | 1.0194 |

| Functional | Basis Set | none <sup>a</sup> | def2-SV/TZV | W06    | auto   |
|------------|-----------|-------------------|-------------|--------|--------|
| BP86       | SVP       | 1.0208            | 1.0173      | 1.0209 | 1.0209 |
|            | SVPD      | 1.0232            | 1.0191      | 1.0233 | 1.0234 |
|            | TZVP      | 1.0193            | 1.0289      | 1.0194 | 1.0193 |
|            | TZVPD     | 1.0197            | 1.0292      | 1.0198 | 1.0197 |
|            | TZVPP     | 1.0181            | 1.0274      | 1.0182 | 1.0181 |
|            | TZVPPD    | 1.0184            | 1.0276      | 1.0185 | 1.0184 |
|            | QZVP      | 1.0191            | 1.0287      | 1.0192 | 1.0192 |
|            | QZVPD     | 1.0194            | 1.0289      | 1.0195 | 1.0194 |
|            | QZVPP     | 1.0191            | 1.0287      | 1.0192 | 1.0191 |
|            | QZVPPD    | 1.0194            | 1.0289      | 1.0195 | 1.0194 |
| HCTH       | SVP       | 0.9998            | 0.9951      | 0.9999 | 0.9999 |
|            | SVPD      | 1.0021            | 0.9976      | 1.0023 | 1.0023 |
|            | TZVP      | 1.0006            | 1.0019      | 1.0007 | 1.0006 |
|            | TZVPD     | 1.0010            | 1.0107      | 1.0012 | 1.0010 |
|            | TZVPP     | 0.9996            | 1.0091      | 0.9997 | 0.9996 |
|            | TZVPPD    | 1.0000            | 1.0094      | 1.0001 | 1.0000 |
|            | QZVP      | 1.0004            | 1.0108      | 1.0006 | 1.0004 |
|            | QZVPD     | 1.0007            | 1.0109      | 1.0008 | 1.0007 |
|            | QZVPP     | 1.0004            | 1.0108      | 1.0006 | 1.0004 |
|            | QZVPPD    | 1.0007            | 1.0109      | 1.0008 | 1.0007 |
| M06-L      | SVP       | 0.9857            | 0.9840      | 0.9859 | 0.9858 |
|            | SVPD      | 0.9892            | 0.9883      | 0.9894 | 0.9894 |
|            | TZVP      | 0.9823            | 0.9937      | 0.9825 | 0.9823 |
|            | TZVPD     | 0.9828            | 0.9941      | 0.9829 | 0.9828 |
|            | TZVPP     | 0.9818            | 0.9929      | 0.9819 | 0.9818 |
|            | TZVPPD    | 0.9823            | 0.9934      | 0.9824 | 0.9823 |
|            | QZVP      | 0.9813            | 0.9931      | 0.9813 | 0.9813 |
|            | QZVPD     | 0.9814            | 0.9932      | 0.9814 | 0.9814 |
|            | QZVPP     | 0.9813            | 0.9931      | 0.9813 | 0.9813 |
|            | QZVPPD    | 0.9814            | 0.9932      | 0.9814 | 0.9814 |

| Functional | Basis Set | none <sup>a</sup> | def2-SV/TZV | W06    | auto   |
|------------|-----------|-------------------|-------------|--------|--------|
| M06-LD3    | SVP       | 0.9857            | 0.9976      | 0.9859 | 0.9858 |
|            | SVPD      | 0.9893            | 1.0014      | 0.9894 | 0.9894 |
|            | TZVP      | 0.9823            | 0.9973      | 0.9825 | 0.9823 |
|            | TZVPD     | 0.9828            | 0.9941      | 0.9829 | 0.9828 |
|            | TZVPP     | 0.9818            | 0.9929      | 0.9819 | 0.9818 |
|            | TZVPPD    | 0.9823            | 0.9934      | 0.9824 | 0.9823 |
|            | QZVP      | 0.9813            | 0.9931      | 0.9813 | 0.9813 |
|            | QZVPD     | 0.9814            | 0.9932      | 0.9814 | 0.9814 |
|            | QZVPP     | 0.9813            | 0.9931      | 0.9813 | 0.9813 |
|            | QZVPPD    | 0.9814            | 0.9932      | 0.9814 | 0.9814 |
| M11-L      | SVP       | 0.9960            | 0.9967      | 0.9962 | 0.9961 |
|            | SVPD      | 0.9993            | 1.0026      | 0.9995 | 0.9995 |
|            | TZVP      | 0.9913            | 1.0037      | 0.9915 | 0.9913 |
|            | TZVPD     | 0.9918            | 1.0040      | 0.9920 | 0.9918 |
|            | TZVPP     | 0.9925            | 1.0047      | 0.9927 | 0.9925 |
|            | TZVPPD    | 0.9926            | 1.0048      | 0.9928 | 0.9926 |
|            | QZVP      | 0.9914            | 1.0039      | 0.9915 | 0.9914 |
|            | QZVPD     | 0.9922            | 1.0046      | 0.9923 | 0.9922 |
|            | QZVPP     | 0.9914            | 1.0039      | 0.9915 | 0.9914 |
|            | QZVPPD    | 0.9922            | 1.0046      | 0.9923 | 0.9922 |
| MN12-L     | SVP       | 0.9734            | 0.9755      | 0.9735 | 0.9735 |
|            | SVPD      | 0.9768            | 0.9807      | 0.9769 | 0.9769 |
|            | TZVP      | 0.9750            | 0.9868      | 0.9751 | 0.9750 |
|            | TZVPD     | 0.9750            | 0.9867      | 0.9751 | 0.9750 |
|            | TZVPP     | 0.9750            | 0.9864      | 0.9751 | 0.9750 |
|            | TZVPPD    | 0.9751            | 0.9865      | 0.9752 | 0.9751 |
|            | QZVP      | 0.9754            | 0.9870      | 0.9755 | 0.9754 |
|            | QZVPD     | 0.9756            | 0.9872      | 0.9758 | 0.9757 |
|            | QZVPP     | 0.9754            | 0.9870      | 0.9755 | 0.9754 |
|            | QZVPPD    | 0.9756            | 0.9872      | 0.9758 | 0.9757 |

| Functional | Basis Set | none <sup>a</sup> | def2-SV/TZV | W06    | auto   |
|------------|-----------|-------------------|-------------|--------|--------|
| MN15-L     | SVP       | 0.9814            | 0.9930      | 0.9815 | 0.9814 |
|            | SVPD      | 0.9852            | 0.9968      | 0.9854 | 0.9854 |
|            | TZVP      | 0.9856            | 0.9966      | 0.9858 | 0.9856 |
|            | TZVPD     | 0.9863            | 0.9971      | 0.9865 | 0.9863 |
|            | TZVPP     | 0.9849            | 0.9953      | 0.9851 | 0.9849 |
|            | TZVPPD    | 0.9853            | 0.9956      | 0.9855 | 0.9853 |
|            | QZVP      | 0.9869            | 0.9986      | 0.9871 | 0.9869 |
|            | QZVPD     | 0.9871            | 0.9987      | 0.9872 | 0.9871 |
|            | QZVPP     | 0.9869            | 0.9986      | 0.9871 | 0.9869 |
|            | QZVPPD    | 0.9871            | 0.9987      | 0.9872 | 0.9871 |
| mPWPW91    | SVP       | 1.0159            | 1.0267      | 1.0160 | 1.0160 |
|            | SVPD      | 1.0182            | 1.0286      | 1.0183 | 1.0183 |
|            | TZVP      | 1.0147            | 1.0244      | 1.0148 | 1.0148 |
|            | TZVPD     | 1.0151            | 1.0247      | 1.0152 | 1.0152 |
|            | TZVPP     | 1.0136            | 1.0229      | 1.0137 | 1.0137 |
|            | TZVPPD    | 1.0138            | 1.0231      | 1.0140 | 1.0140 |
|            | QZVP      | 1.0145            | 1.0243      | 1.0146 | 1.0146 |
|            | QZVPD     | 1.0148            | 1.0244      | 1.0149 | 1.0149 |
|            | QZVPP     | 1.0145            | 1.0243      | 1.0146 | 1.0146 |
|            | QZVPPD    | 1.0148            | 1.0244      | 1.0149 | 1.0149 |
| N12        | SVP       | 0.9943            | 0.9901      | 0.9944 | 0.9944 |
|            | SVPD      | 0.9961            | 0.9916      | 0.9963 | 0.9963 |
|            | TZVP      | 0.9912            | 1.0004      | 0.9913 | 0.9912 |
|            | TZVPD     | 0.9913            | 1.0003      | 0.9914 | 0.9913 |
|            | TZVPP     | 0.9898            | 0.9985      | 0.9898 | 0.9898 |
|            | TZVPPD    | 0.9900            | 0.9986      | 0.9900 | 0.9900 |
|            | QZVP      | 0.9903            | 0.9993      | 0.9903 | 0.9903 |
|            | QZVPD     | 0.9905            | 0.9994      | 0.9906 | 0.9905 |
|            | QZVPP     | 0.9903            | 0.9993      | 0.9903 | 0.9903 |
|            | QZVPPD    | 0.9905            | 0.9994      | 0.9906 | 0.9905 |

| Functional          | Basis Set | none <sup>a</sup> | def2-SV/TZV | W06    | auto   |
|---------------------|-----------|-------------------|-------------|--------|--------|
| OLYP                | SVP       | 1.0076            | 1.0188      | 1.0078 | 1.0077 |
|                     | SVPD      | 1.0099            | 1.0206      | 1.0101 | 1.0101 |
|                     | TZVP      | 1.0082            | 1.0183      | 1.0084 | 1.0082 |
|                     | TZVPD     | 1.0086            | 1.0184      | 1.0087 | 1.0086 |
|                     | TZVPP     | 1.0072            | 1.0169      | 1.0074 | 1.0072 |
|                     | TZVPPD    | 1.0076            | 1.0172      | 1.0078 | 1.0076 |
|                     | QZVP      | 1.0080            | 1.0184      | 1.0081 | 1.0080 |
|                     | QZVPD     | 1.0082            | 1.0185      | 1.0084 | 1.0082 |
|                     | QZVPP     | 1.0080            | 1.0184      | 1.0081 | 1.0080 |
|                     | QZVPPD    | 1.0082            | 1.0185      | 1.0084 | 1.0082 |
| PBE                 | SVP       | 1.0180            | 1.0148      | 1.0181 | 1.0181 |
|                     | SVPD      | 1.0204            | 1.0166      | 1.0205 | 1.0205 |
|                     | TZVP      | 1.0172            | 1.0269      | 1.0173 | 1.0172 |
|                     | TZVPD     | 1.0176            | 1.0272      | 1.0177 | 1.0176 |
|                     | TZVPP     | 1.0161            | 1.0254      | 1.0162 | 1.0161 |
|                     | TZVPPD    | 1.0164            | 1.0256      | 1.0165 | 1.0164 |
|                     | QZVP      | 1.0171            | 1.0270      | 1.0173 | 1.0171 |
|                     | QZVPD     | 1.0174            | 1.0271      | 1.0175 | 1.0174 |
|                     | QZVPP     | 1.0171            | 1.0270      | 1.0173 | 1.0171 |
|                     | QZVPPD    | 1.0174            | 1.0271      | 1.0175 | 1.0174 |
| PBE <sub>D3BJ</sub> | SVP       | 1.0179            | 1.0288      | 1.0181 | 1.0181 |
|                     | SVPD      | 1.0203            | 1.0307      | 1.0205 | 1.0205 |
|                     | TZVP      | 1.0172            | 1.0269      | 1.0173 | 1.0173 |
|                     | TZVPD     | 1.0176            | 1.0271      | 1.0177 | 1.0177 |
|                     | TZVPP     | 1.0160            | 1.0253      | 1.0161 | 1.0161 |
|                     | TZVPPD    | 1.0163            | 1.0256      | 1.0164 | 1.0164 |
|                     | QZVP      | 1.0171            | 1.0269      | 1.0172 | 1.0172 |
|                     | QZVPD     | 1.0173            | 1.0270      | 1.0174 | 1.0174 |
|                     | QZVPP     | 1.0171            | 1.0269      | 1.0172 | 1.0172 |
|                     | QZVPPD    | 1.0173            | 1.0270      | 1.0174 | 1.0174 |

| <b>Functional</b> | <b>Basis Set</b> | <b>none<sup>a</sup></b> | <b>def2-SV/TZV</b> | <b>W06</b> | <b>auto</b> |
|-------------------|------------------|-------------------------|--------------------|------------|-------------|
| revTPSS           | SVP              | 1.0007                  | 0.9955             | 1.0008     | 1.0001      |
|                   | SVPD             | 1.0030                  | 0.9978             | 1.0031     | 1.0031      |
|                   | TZVP             | 1.0013                  | 1.0119             | 1.0015     | 1.0013      |
|                   | TZVPD            | 1.0016                  | 1.0122             | 1.0017     | 1.0016      |
|                   | TZVPP            | 1.0006                  | 1.0111             | 1.0007     | 1.0006      |
|                   | TZVPPD           | 1.0008                  | 1.0112             | 1.0009     | 1.0008      |
|                   | QZVP             | 1.0007                  | 1.0113             | 1.0008     | 1.0007      |
|                   | QZVPD            | 1.0009                  | 1.0114             | 1.0010     | 1.0009      |
|                   | QZVPP            | 1.0007                  | 1.0113             | 1.0008     | 1.0007      |
|                   | QZVPPD           | 1.0009                  | 1.0114             | 1.0010     | 1.0009      |
| SOGGA11           | SVP              | 1.0113                  | 1.0221             | 1.0114     | 1.0113      |
|                   | SVPD             | 1.0054                  | 1.0158             | 1.0056     | 1.0055      |
|                   | TZVP             | 1.0081                  | 1.0179             | 1.0082     | 1.0081      |
|                   | TZVPD            | 1.0099                  | 1.0188             | 1.0101     | 1.0099      |
|                   | TZVPP            | 1.0101                  | 1.0194             | 1.0102     | 1.0101      |
|                   | TZVPPD           | 1.0089                  | 1.0179             | 1.0101     | 1.0089      |
|                   | QZVP             | 1.0103                  | 1.0215             | 1.0107     | 1.0103      |
|                   | QZVPD            | 1.0128                  | 1.0232             | 1.0137     | 1.0128      |
|                   | QZVPP            | 1.0103                  | 1.0215             | 1.0107     | 1.0103      |
|                   | QZVPPD           | 1.0128                  | 1.0232             | 1.0137     | 1.0128      |
| TPSS              | SVP              | 1.0018                  | 0.9968             | 1.0019     | 1.0019      |
|                   | SVPD             | 1.0040                  | 0.9991             | 1.0042     | 1.0042      |
|                   | TZVP             | 1.0019                  | 1.0123             | 1.0021     | 1.0020      |
|                   | TZVPD            | 1.0023                  | 1.0127             | 1.0024     | 1.0023      |
|                   | TZVPP            | 1.0013                  | 1.0116             | 1.0014     | 1.0130      |
|                   | TZVPPD           | 1.0015                  | 1.0118             | 1.0017     | 1.0015      |
|                   | QZVP             | 1.0015                  | 1.0119             | 1.0016     | 1.0015      |
|                   | QZVPD            | 1.0017                  | 1.0120             | 1.0018     | 1.0017      |
|                   | QZVPP            | 1.0015                  | 1.0119             | 1.0016     | 1.0015      |
|                   | QZVPPD           | 1.0017                  | 1.0120             | 1.0018     | 1.0017      |



| Functional           | Basis Set | none <sup>a</sup> | def2-SV/TZV | W06    | auto   |
|----------------------|-----------|-------------------|-------------|--------|--------|
| TPSS <sub>D3BJ</sub> | SVP       | 1.0017            | 0.9968      | 1.0019 | 1.0018 |
|                      | SVPD      | 1.0040            | 0.9990      | 1.0041 | 1.0042 |
|                      | TZVP      | 1.0017            | 1.0120      | 1.0018 | 1.0017 |
|                      | TZVPD     | 1.0022            | 1.0126      | 1.0024 | 1.0022 |
|                      | TZVPP     | 1.0013            | 1.0115      | 1.0014 | 1.0013 |
|                      | TZVPPD    | 1.0015            | 1.0117      | 1.0016 | 1.0015 |
|                      | QZVP      | 1.0015            | 1.0119      | 1.0016 | 1.0015 |
|                      | QZVPD     | 1.0017            | 1.0120      | 1.0018 | 1.0015 |
|                      | QZVPP     | 1.0015            | 1.0119      | 1.0016 | 1.0015 |
|                      | QZVPPD    | 1.0017            | 1.0120      | 1.0018 | 1.0017 |
| VSXC                 | SVP       | 0.9944            | 1.0055      | 0.9945 | 0.9945 |
|                      | SVPD      | 0.9976            | 1.0083      | 0.9977 | 0.9977 |
|                      | TZVP      | 0.9944            | 1.0043      | 0.9945 | 0.9945 |
|                      | TZVPD     | 0.9950            | 1.0047      | 0.9951 | 0.9951 |
|                      | TZVPP     | 0.9930            | 1.0027      | 0.9932 | 0.9932 |
|                      | TZVPPD    | 0.9935            | 1.0030      | 0.9936 | 0.9936 |
|                      | QZVP      | 0.9942            | 1.0045      | 0.9943 | 0.9943 |
|                      | QZVPD     | 0.9944            | 1.0046      | 0.9945 | 0.9945 |
|                      | QZVPP     | 0.9942            | 1.0045      | 0.9943 | 0.9943 |
|                      | QZVPPD    | 0.9944            | 1.0046      | 0.9945 | 0.9945 |
| XLYP                 | SVP       | 1.0236            | 1.0346      | 1.0238 | 1.0238 |
|                      | SVPD      | 1.0253            | 1.0357      | 1.0255 | 1.0255 |
|                      | TZVP      | 1.0199            | 1.0292      | 1.0199 | 1.0199 |
|                      | TZVPD     | 1.0200            | 1.0292      | 1.0201 | 1.0201 |
|                      | TZVPP     | 1.0182            | 1.0271      | 1.0183 | 1.0183 |
|                      | TZVPPD    | 1.0184            | 1.0272      | 1.0185 | 1.0185 |
|                      | QZVP      | 1.0192            | 1.0284      | 1.0193 | 1.0193 |
|                      | QZVPD     | 1.0194            | 1.0285      | 1.0195 | 1.0195 |
|                      | QZVPP     | 1.0192            | 1.0284      | 1.0193 | 1.0193 |
|                      | QZVPPD    | 1.0194            | 1.0285      | 1.0195 | 1.0195 |

| <b>Functional</b> | <b>Basis Set</b> | <b>none<sup>a</sup></b> | <b>def2-SV/TZV</b> | <b>W06</b> | <b>auto</b> |
|-------------------|------------------|-------------------------|--------------------|------------|-------------|
| τHCTH             | SVP              | 1.0032                  | 0.9990             | 1.0033     | 1.0033      |
|                   | SVPD             | 1.0058                  | 1.0020             | 1.0059     | 1.0059      |
|                   | TZVP             | 1.0031                  | 1.0127             | 1.0033     | 1.0032      |
|                   | TZVPD            | 1.0035                  | 1.0130             | 1.0037     | 1.0035      |
|                   | TZVPP            | 1.0024                  | 1.0119             | 1.0025     | 1.0024      |
|                   | TZVPPD           | 1.0026                  | 1.0121             | 1.0027     | 1.0026      |
|                   | QZVP             | 1.0024                  | 1.0130             | 1.0025     | 1.0024      |
|                   | QZVPD            | 1.0027                  | 1.0130             | 1.0027     | 1.0027      |
|                   | QZVPP            | 1.0024                  | 1.0130             | 1.0025     | 1.0024      |
|                   | QZVPPD           | 1.0027                  | 1.0130             | 1.0027     | 1.0027      |

<sup>a</sup> Not using any density fitting.

**Table S5.** Root-mean-square deviations (RMSD, cm<sup>-1</sup>) of  $\lambda_{ZPE}$  for various GGA and meta-GGA exchange–correlation functional–basis set–density fitting basis set combinations.

| Functional | Basis Set | none <sup>a</sup> | def2-SV/TZV | W06  | auto  |
|------------|-----------|-------------------|-------------|------|-------|
| B97-D      | SVP       | 0.14              | 0.26        | 0.14 | 13.18 |
|            | SVPD      | 0.13              | 0.24        | 0.14 | 12.99 |
|            | TZVP      | 0.10              | 0.24        | 0.10 | 12.23 |
|            | TZVPD     | 0.11              | 0.25        | 0.11 | 13.08 |
|            | TZVPP     | 0.11              | 0.25        | 0.11 | 13.10 |
|            | TZVPPD    | 0.11              | 0.25        | 0.11 | 13.08 |
|            | QZVP      | 0.11              | 0.25        | 0.11 | 13.06 |
|            | QZVPD     | 0.11              | 0.25        | 0.11 | 13.09 |
|            | QZVPP     | 0.11              | 0.25        | 0.11 | 13.09 |
|            | QZVPPD    | 0.11              | 0.25        | 0.11 | 13.09 |
| BLYP       | SVP       | 0.15              | 0.29        | 0.15 | 0.15  |
|            | SVPD      | 0.13              | 0.27        | 0.13 | 0.13  |
|            | TZVP      | 0.12              | 0.28        | 0.12 | 0.12  |
|            | TZVPD     | 0.12              | 0.29        | 0.13 | 0.12  |
|            | TZVPP     | 0.12              | 0.29        | 0.12 | 0.12  |
|            | TZVPPD    | 0.12              | 0.29        | 0.12 | 0.12  |
|            | QZVP      | 0.12              | 0.29        | 0.12 | 0.12  |
|            | QZVPD     | 0.12              | 0.29        | 0.12 | 0.12  |
|            | QZVPP     | 0.12              | 0.29        | 0.12 | 0.12  |
|            | QZVPPD    | 0.12              | 0.29        | 0.12 | 0.12  |

| Functional | Basis Set | none <sup>a</sup> | def2-SV/TZV | W06  | auto |
|------------|-----------|-------------------|-------------|------|------|
| BP86       | SVP       | 0.13              | 0.63        | 0.13 | 0.13 |
|            | SVPD      | 0.11              | 0.69        | 0.11 | 0.11 |
|            | TZVP      | 0.09              | 0.22        | 0.09 | 0.09 |
|            | TZVPD     | 0.09              | 0.23        | 0.09 | 0.09 |
|            | TZVPP     | 0.09              | 0.23        | 0.09 | 0.09 |
|            | TZVPPD    | 0.09              | 0.23        | 0.09 | 0.09 |
|            | QZVP      | 0.09              | 0.23        | 0.09 | 0.09 |
|            | QZVPD     | 0.09              | 0.23        | 0.09 | 0.09 |
|            | QZVPP     | 0.09              | 0.23        | 0.09 | 0.09 |
|            | QZVPPD    | 0.09              | 0.23        | 0.09 | 0.09 |
| HCTH       | SVP       | 0.16              | 0.56        | 0.16 | 0.16 |
|            | SVPD      | 0.14              | 0.66        | 0.14 | 0.14 |
|            | TZVP      | 0.10              | 0.69        | 0.10 | 0.10 |
|            | TZVPD     | 0.11              | 0.19        | 0.11 | 0.11 |
|            | TZVPP     | 0.11              | 0.18        | 0.11 | 0.11 |
|            | TZVPPD    | 0.11              | 0.19        | 0.12 | 0.11 |
|            | QZVP      | 0.11              | 0.19        | 0.11 | 0.11 |
|            | QZVPD     | 0.11              | 0.19        | 0.11 | 0.11 |
|            | QZVPP     | 0.11              | 0.19        | 0.11 | 0.11 |
|            | QZVPPD    | 0.11              | 0.19        | 0.11 | 0.11 |
| M06-L      | SVP       | 0.14              | 0.53        | 0.14 | 0.14 |
|            | SVPD      | 0.14              | 0.65        | 0.14 | 0.14 |
|            | TZVP      | 0.11              | 0.19        | 0.11 | 0.11 |
|            | TZVPD     | 0.12              | 0.20        | 0.12 | 0.12 |
|            | TZVPP     | 0.11              | 0.20        | 0.11 | 0.11 |
|            | TZVPPD    | 0.11              | 0.19        | 0.11 | 0.11 |
|            | QZVP      | 0.10              | 0.20        | 0.10 | 0.10 |
|            | QZVPD     | 0.10              | 0.19        | 0.10 | 0.10 |
|            | QZVPP     | 0.10              | 0.20        | 0.10 | 0.10 |
|            | QZVPPD    | 0.10              | 0.19        | 0.10 | 0.10 |

| <b>Functional</b> | <b>Basis Set</b> | <b>none<sup>a</sup></b> | <b>def2-SV/TZV</b> | <b>W06</b> | <b>auto</b> |
|-------------------|------------------|-------------------------|--------------------|------------|-------------|
| M06-LD3           | SVP              | 0.17                    | 0.21               | 0.14       | 0.14        |
|                   | SVPD             | 0.17                    | 0.22               | 0.14       | 0.14        |
|                   | TZVP             | 0.13                    | 0.21               | 0.11       | 0.11        |
|                   | TZVPD            | 0.14                    | 0.22               | 0.12       | 0.12        |
|                   | TZVPP            | 0.13                    | 0.21               | 0.11       | 0.11        |
|                   | TZVPPD           | 0.13                    | 0.21               | 0.11       | 0.11        |
|                   | QZVP             | 0.12                    | 0.22               | 0.10       | 0.10        |
|                   | QZVPD            | 0.12                    | 0.21               | 0.10       | 0.10        |
|                   | QZVPP            | 0.12                    | 0.22               | 0.10       | 0.10        |
|                   | QZVPPD           | 0.12                    | 0.21               | 0.10       | 0.10        |
| M11-L             | SVP              | 0.27                    | 0.55               | 0.27       | 0.27        |
|                   | SVPD             | 0.26                    | 0.69               | 0.26       | 0.26        |
|                   | TZVP             | 0.23                    | 0.21               | 0.23       | 0.23        |
|                   | TZVPD            | 0.23                    | 0.22               | 0.23       | 0.23        |
|                   | TZVPP            | 0.24                    | 0.22               | 0.24       | 0.24        |
|                   | TZVPPD           | 0.24                    | 0.22               | 0.24       | 0.24        |
|                   | QZVP             | 0.23                    | 0.19               | 0.23       | 0.23        |
|                   | QZVPD            | 0.23                    | 0.19               | 0.23       | 0.23        |
|                   | QZVPP            | 0.23                    | 0.19               | 0.23       | 0.23        |
|                   | QZVPPD           | 0.23                    | 0.19               | 0.23       | 0.23        |
| MN12-L            | SVP              | 0.15                    | 0.53               | 0.15       | 0.15        |
|                   | SVPD             | 0.14                    | 0.65               | 0.14       | 0.14        |
|                   | TZVP             | 0.13                    | 0.21               | 0.13       | 0.13        |
|                   | TZVPD            | 0.13                    | 0.22               | 0.13       | 0.13        |
|                   | TZVPP            | 0.14                    | 0.22               | 0.14       | 0.14        |
|                   | TZVPPD           | 0.14                    | 0.22               | 0.14       | 0.14        |
|                   | QZVP             | 0.14                    | 0.22               | 0.14       | 0.14        |
|                   | QZVPD            | 0.14                    | 0.22               | 0.14       | 0.14        |
|                   | QZVPP            | 0.14                    | 0.22               | 0.14       | 0.14        |
|                   | QZVPPD           | 0.14                    | 0.22               | 0.14       | 0.14        |

| Functional | Basis Set | none <sup>a</sup> | def2-SV/TZV | W06  | auto  |
|------------|-----------|-------------------|-------------|------|-------|
| MN15-L     | SVP       | 0.17              | 0.19        | 0.17 | 13.18 |
|            | SVPD      | 0.15              | 0.18        | 0.15 | 12.44 |
|            | TZVP      | 0.14              | 0.19        | 0.14 | 11.75 |
|            | TZVPD     | 0.14              | 0.21        | 0.14 | 12.90 |
|            | TZVPP     | 0.15              | 0.21        | 0.15 | 12.91 |
|            | TZVPPD    | 0.15              | 0.21        | 0.15 | 12.88 |
|            | QZVP      | 0.15              | 0.21        | 0.15 | 12.88 |
|            | QZVPD     | 0.15              | 0.21        | 0.15 | 12.74 |
|            | QZVPP     | 0.15              | 0.21        | 0.15 | 12.74 |
|            | QZVPPD    | 0.15              | 0.21        | 0.15 | 12.74 |
| mPWPW91    | SVP       | 0.13              | 0.24        | 0.13 | 13.18 |
|            | SVPD      | 0.11              | 0.22        | 0.11 | 13.02 |
|            | TZVP      | 0.08              | 0.22        | 0.08 | 11.98 |
|            | TZVPD     | 0.09              | 0.23        | 0.09 | 13.11 |
|            | TZVPP     | 0.09              | 0.23        | 0.09 | 13.13 |
|            | TZVPPD    | 0.09              | 0.23        | 0.09 | 13.12 |
|            | QZVP      | 0.09              | 0.23        | 0.09 | 13.10 |
|            | QZVPD     | 0.09              | 0.23        | 0.09 | 13.11 |
|            | QZVPP     | 0.09              | 0.23        | 0.09 | 13.11 |
|            | QZVPPD    | 0.09              | 0.23        | 0.09 | 13.11 |
| N12        | SVP       | 0.13              | 0.57        | 0.13 | 13.18 |
|            | SVPD      | 0.11              | 0.64        | 0.11 | 12.16 |
|            | TZVP      | 0.07              | 0.18        | 0.08 | 10.26 |
|            | TZVPD     | 0.08              | 0.20        | 0.08 | 11.85 |
|            | TZVPP     | 0.08              | 0.20        | 0.08 | 12.10 |
|            | TZVPPD    | 0.09              | 0.20        | 0.09 | 12.00 |
|            | QZVP      | 0.08              | 0.20        | 0.08 | 12.00 |
|            | QZVPD     | 0.08              | 0.20        | 0.08 | 11.99 |
|            | QZVPP     | 0.08              | 0.20        | 0.08 | 11.98 |
|            | QZVPPD    | 0.08              | 0.20        | 0.08 | 11.99 |

| Functional          | Basis Set | none <sup>a</sup> | def2-SV/TZV | W06  | auto  |
|---------------------|-----------|-------------------|-------------|------|-------|
| OLYP                | SVP       | 0.13              | 0.22        | 0.13 | 13.18 |
|                     | SVPD      | 0.10              | 0.20        | 0.11 | 12.91 |
|                     | TZVP      | 0.08              | 0.18        | 0.08 | 11.39 |
|                     | TZVPD     | 0.08              | 0.20        | 0.08 | 12.75 |
|                     | TZVPP     | 0.08              | 0.19        | 0.08 | 12.81 |
|                     | TZVPPD    | 0.09              | 0.20        | 0.09 | 12.90 |
|                     | QZVP      | 0.08              | 0.20        | 0.08 | 12.83 |
|                     | QZVPD     | 0.08              | 0.20        | 0.08 | 12.83 |
|                     | QZVPP     | 0.08              | 0.20        | 0.08 | 12.83 |
|                     | QZVPPD    | 0.08              | 0.20        | 0.08 | 12.83 |
| PBE                 | SVP       | 0.14              | 0.62        | 0.14 | 13.18 |
|                     | SVPD      | 0.11              | 0.68        | 0.11 | 12.88 |
|                     | TZVP      | 0.08              | 0.21        | 0.09 | 11.72 |
|                     | TZVPD     | 0.09              | 0.22        | 0.09 | 12.97 |
|                     | TZVPP     | 0.09              | 0.22        | 0.09 | 13.02 |
|                     | TZVPPD    | 0.09              | 0.22        | 0.09 | 13.00 |
|                     | QZVP      | 0.09              | 0.22        | 0.09 | 12.97 |
|                     | QZVPD     | 0.09              | 0.22        | 0.09 | 12.97 |
|                     | QZVPP     | 0.09              | 0.22        | 0.09 | 12.96 |
|                     | QZVPPD    | 0.09              | 0.22        | 0.09 | 12.97 |
| PBE <sub>D3BJ</sub> | SVP       | 0.14              | 0.23        | 0.14 | 13.18 |
|                     | SVPD      | 0.11              | 0.21        | 0.11 | 12.85 |
|                     | TZVP      | 0.08              | 0.21        | 0.09 | 11.67 |
|                     | TZVPD     | 0.09              | 0.22        | 0.09 | 12.97 |
|                     | TZVPP     | 0.09              | 0.22        | 0.09 | 13.02 |
|                     | TZVPPD    | 0.09              | 0.22        | 0.09 | 12.99 |
|                     | QZVP      | 0.09              | 0.22        | 0.09 | 12.97 |
|                     | QZVPD     | 0.09              | 0.22        | 0.09 | 12.97 |
|                     | QZVPP     | 0.09              | 0.22        | 0.09 | 12.96 |
|                     | QZVPPD    | 0.09              | 0.22        | 0.09 | 12.97 |

| Functional | Basis Set | none <sup>a</sup> | def2-SV/TZV | W06  | auto  |
|------------|-----------|-------------------|-------------|------|-------|
| revTPSS    | SVP       | 0.13              | 0.65        | 0.13 | 13.18 |
|            | SVPD      | 0.12              | 0.71        | 0.12 | 12.49 |
|            | TZVP      | 0.10              | 0.26        | 0.10 | 13.01 |
|            | TZVPD     | 0.11              | 0.26        | 0.11 | 11.81 |
|            | TZVPP     | 0.10              | 0.26        | 0.10 | 11.87 |
|            | TZVPPD    | 0.10              | 0.26        | 0.10 | 11.79 |
|            | QZVP      | 0.10              | 0.26        | 0.10 | 11.85 |
|            | QZVPD     | 0.10              | 0.26        | 0.10 | 11.62 |
|            | QZVPP     | 0.10              | 0.26        | 0.10 | 11.68 |
|            | QZVPPD    | 0.10              | 0.26        | 0.10 | 11.62 |
| SOGGA11    | SVP       | 0.19              | 0.22        | 0.19 | 13.18 |
|            | SVPD      | 0.15              | 0.23        | 0.15 | 11.77 |
|            | TZVP      | 0.10              | 0.18        | 0.10 | 10.75 |
|            | TZVPD     | 0.10              | 0.17        | 0.10 | 12.28 |
|            | TZVPP     | 0.14              | 0.22        | 0.14 | 11.28 |
|            | TZVPPD    | 0.12              | 0.21        | 0.12 | 12.33 |
|            | QZVP      | 0.16              | 0.23        | 0.17 | 12.68 |
|            | QZVPD     | 0.31              | 0.24        | 0.30 | 11.94 |
|            | QZVPP     | 0.16              | 0.23        | 0.17 | 12.25 |
|            | QZVPPD    | 0.31              | 0.24        | 0.30 | 11.94 |
| TPSS       | SVP       | 0.13              | 0.64        | 0.13 | 13.18 |
|            | SVPD      | 0.12              | 0.71        | 0.12 | 12.84 |
|            | TZVP      | 0.09              | 0.25        | 0.09 | 13.17 |
|            | TZVPD     | 0.10              | 0.26        | 0.10 | 12.42 |
|            | TZVPP     | 0.10              | 0.25        | 0.10 | 12.44 |
|            | TZVPPD    | 0.10              | 0.25        | 0.10 | 12.40 |
|            | QZVP      | 0.10              | 0.26        | 0.10 | 12.45 |
|            | QZVPD     |                   | 0.26        | 0.10 | 12.25 |
|            | QZVPP     |                   | 0.26        | 0.10 | 12.29 |
|            | QZVPPD    |                   | 0.26        | 0.10 | 12.25 |



| Functional           | Basis Set | none <sup>a</sup> | def2-SV/TZV | W06  | auto  |
|----------------------|-----------|-------------------|-------------|------|-------|
| TPSS <sub>D3BJ</sub> | SVP       | 0.13              | 0.64        | 0.13 | 13.18 |
|                      | SVPD      | 0.12              | 0.71        | 0.12 | 12.84 |
|                      | TZVP      | 0.10              | 0.26        | 0.10 | 13.17 |
|                      | TZVPD     | 0.10              | 0.26        | 0.10 | 12.28 |
|                      | TZVPP     | 0.10              | 0.25        | 0.10 | 12.43 |
|                      | TZVPPD    | 0.10              | 0.25        | 0.10 | 12.39 |
|                      | QZVP      | 0.10              | 0.26        | 0.10 | 12.45 |
|                      | QZVPD     | 0.10              | 0.26        | 0.10 | 12.24 |
|                      | QZVPP     | 0.10              | 0.26        | 0.10 | 12.28 |
|                      | QZVPPD    | 0.10              | 0.26        | 0.10 | 12.24 |
| VSXC                 | SVP       | 0.15              | 0.22        | 0.15 | 13.18 |
|                      | SVPD      | 0.12              | 0.21        | 0.13 | 12.46 |
|                      | TZVP      | 0.10              | 0.20        | 0.10 | 11.22 |
|                      | TZVPD     | 0.10              | 0.22        | 0.10 | 12.55 |
|                      | TZVPP     | 0.10              | 0.21        | 0.11 | 12.66 |
|                      | TZVPPD    | 0.11              | 0.22        | 0.11 | 12.68 |
|                      | QZVP      | 0.10              | 0.21        | 0.10 | 12.66 |
|                      | QZVPD     | 0.10              | 0.21        | 0.10 | 12.69 |
|                      | QZVPP     | 0.10              | 0.21        | 0.10 | 12.67 |
|                      | QZVPPD    | 0.10              | 0.21        | 0.10 | 12.69 |
| XLYP                 | SVP       | 0.15              | 0.29        | 0.15 | 13.18 |
|                      | SVPD      | 0.13              | 0.27        | 0.13 | 13.13 |
|                      | TZVP      | 0.12              | 0.28        | 0.12 | 12.91 |
|                      | TZVPD     | 0.12              | 0.29        | 0.13 | 12.86 |
|                      | TZVPP     | 0.12              | 0.28        | 0.12 | 12.86 |
|                      | TZVPPD    | 0.12              | 0.29        | 0.12 | 12.89 |
|                      | QZVP      | 0.11              | 0.28        | 0.12 | 12.93 |
|                      | QZVPD     | 0.12              | 0.29        | 0.12 | 12.85 |
|                      | QZVPP     | 0.11              | 0.28        | 0.12 | 12.87 |
|                      | QZVPPD    | 0.12              | 0.29        | 0.12 | 12.85 |

| <b>Functional</b> | <b>Basis Set</b> | <b>none<sup>a</sup></b> | <b>def2-SV/TZV</b> | <b>W06</b> | <b>auto</b> |
|-------------------|------------------|-------------------------|--------------------|------------|-------------|
| τHCTH             | SVP              | 0.14                    | 0.58               | 0.14       | 13.18       |
|                   | SVPD             | 0.12                    | 0.67               | 0.12       | 12.83       |
|                   | TZVP             | 0.09                    | 0.19               | 0.10       | 11.93       |
|                   | TZVPD            | 0.10                    | 0.20               | 0.10       | 12.75       |
|                   | TZVPP            | 0.10                    | 0.20               | 0.10       | 12.82       |
|                   | TZVPPD           | 0.10                    | 0.20               | 0.10       | 12.82       |
|                   | QZVP             | 0.09                    | 0.20               | 0.10       | 12.79       |
|                   | QZVPD            | 0.09                    | 0.20               | 0.10       | 12.92       |
|                   | QZVPP            | 0.09                    | 0.20               | 0.10       | 12.91       |
|                   | QZVPPD           | 0.09                    | 0.20               | 0.10       | 12.92       |

<sup>a</sup> Not using any density fitting.

**Table S6.**  $\lambda_{fund}$  scale factors for various GGA and meta-GGA exchange–correlation functional–basis set–density fitting basis set combinations.

| Functional | Basis Set | none <sup>a</sup> | def2-SV/TZV | W06    | auto   |
|------------|-----------|-------------------|-------------|--------|--------|
| B97-D      | SVP       | 0.9896            | 0.9993      | 0.9897 | 0.9897 |
|            | SVPD      | 0.9895            | 0.9979      | 0.9896 | 0.9896 |
|            | TZVP      | 0.9895            | 0.9975      | 0.9896 | 0.9896 |
|            | TZVPD     | 0.9900            | 0.9977      | 0.9901 | 0.9901 |
|            | TZVPP     | 0.9886            | 0.9962      | 0.9886 | 0.9886 |
|            | TZVPPD    | 0.9887            | 0.9961      | 0.9888 | 0.9888 |
|            | QZVP      | 0.9892            | 0.9971      | 0.9893 | 0.9893 |
|            | QZVPD     | 0.9894            | 0.9971      | 0.9895 | 0.9895 |
|            | QZVPP     | 0.9892            | 0.9971      | 0.9893 | 0.9893 |
|            | QZVPPD    | 0.9894            | 0.9971      | 0.9895 | 0.9895 |
| BLYP       | SVP       | 1.0013            | 1.0112      | 1.0014 | 1.0015 |
|            | SVPD      | 0.9997            | 1.0080      | 0.9998 | 0.9999 |
|            | TZVP      | 0.9986            | 1.0062      | 0.9986 | 0.9986 |
|            | TZVPD     | 0.9988            | 1.0061      | 0.9989 | 0.9988 |
|            | TZVPP     | 0.9969            | 1.0040      | 0.9969 | 0.9969 |
|            | TZVPPD    | 0.9970            | 1.0039      | 0.9970 | 0.9970 |
|            | QZVP      | 0.9979            | 1.0053      | 0.9979 | 0.9979 |
|            | QZVPD     | 0.9981            | 1.0054      | 0.9981 | 0.9981 |
|            | QZVPP     | 0.9979            | 1.0053      | 0.9979 | 0.9979 |
|            | QZVPPD    | 0.9981            | 1.0054      | 0.9981 | 0.9981 |

| Functional | Basis Set | none <sup>a</sup> | def2-SV/TZV | W06    | auto   |
|------------|-----------|-------------------|-------------|--------|--------|
| BP86       | SVP       | 0.9956            | 0.9864      | 0.9957 | 0.9958 |
|            | SVPD      | 0.9956            | 0.9855      | 0.9957 | 0.9958 |
|            | TZVP      | 0.9953            | 1.0033      | 0.9954 | 0.9954 |
|            | TZVPD     | 0.9958            | 1.0035      | 0.9959 | 0.9958 |
|            | TZVPP     | 0.9942            | 1.0017      | 0.9942 | 0.9942 |
|            | TZVPPD    | 0.9943            | 1.0017      | 0.9944 | 0.9944 |
|            | QZVP      | 0.9952            | 1.0030      | 0.9952 | 0.9952 |
|            | QZVPD     | 0.9954            | 1.0031      | 0.9954 | 0.9954 |
|            | QZVPP     | 0.9952            | 1.0030      | 0.9952 | 0.9952 |
|            | QZVPPD    | 0.9954            | 1.0031      | 0.9954 | 0.9954 |
| HCTH       | SVP       | 0.9725            | 0.9628      | 0.9726 | 0.9727 |
|            | SVPD      | 0.9726            | 0.9623      | 0.9727 | 0.9728 |
|            | TZVP      | 0.9747            | 0.9686      | 0.9748 | 0.9747 |
|            | TZVPD     | 0.9752            | 0.9830      | 0.9754 | 0.9752 |
|            | TZVPP     | 0.9739            | 0.9816      | 0.9740 | 0.9739 |
|            | TZVPPD    | 0.9741            | 0.9817      | 0.9743 | 0.9742 |
|            | QZVP      | 0.9746            | 0.9831      | 0.9747 | 0.9746 |
|            | QZVPD     | 0.9748            | 0.9832      | 0.9749 | 0.9748 |
|            | QZVPP     | 0.9746            | 0.9831      | 0.9747 | 0.9746 |
|            | QZVPPD    | 0.9748            | 0.9832      | 0.9749 | 0.9748 |
| M06-L      | SVP       | 0.9587            | 0.9522      | 0.9588 | 0.9589 |
|            | SVPD      | 0.9607            | 0.9532      | 0.9608 | 0.9608 |
|            | TZVP      | 0.9594            | 0.9691      | 0.9595 | 0.9594 |
|            | TZVPD     | 0.9598            | 0.9693      | 0.9599 | 0.9598 |
|            | TZVPP     | 0.9579            | 0.9672      | 0.9580 | 0.9579 |
|            | TZVPPD    | 0.9584            | 0.9675      | 0.9585 | 0.9584 |
|            | QZVP      | 0.9574            | 0.9672      | 0.9575 | 0.9574 |
|            | QZVPD     | 0.9575            | 0.9673      | 0.9575 | 0.9575 |
|            | QZVPP     | 0.9574            | 0.9672      | 0.9575 | 0.9574 |
|            | QZVPPD    | 0.9575            | 0.9673      | 0.9575 | 0.9575 |

| Functional | Basis Set | none <sup>a</sup> | def2-SV/TZV | W06    | auto   |
|------------|-----------|-------------------|-------------|--------|--------|
| M06-LD3    | SVP       | 0.9587            | 0.9689      | 0.9589 | 0.9958 |
|            | SVPD      | 0.9607            | 0.9703      | 0.9608 | 0.9608 |
|            | TZVP      | 0.9594            | 0.9691      | 0.9595 | 0.9594 |
|            | TZVPD     | 0.9598            | 0.9693      | 0.9600 | 0.9598 |
|            | TZVPP     | 0.9579            | 0.9672      | 0.9580 | 0.9579 |
|            | TZVPPD    | 0.9584            | 0.9675      | 0.9585 | 0.9584 |
|            | QZVP      | 0.9574            | 0.9672      | 0.9575 | 0.9574 |
|            | QZVPD     | 0.9575            | 0.9673      | 0.9575 | 0.9575 |
|            | QZVPP     | 0.9574            | 0.9672      | 0.9575 | 0.9574 |
|            | QZVPPD    | 0.9575            | 0.9673      | 0.9575 | 0.9575 |
| M11-L      | SVP       | 0.9617            | 0.9563      | 0.9619 | 0.9619 |
|            | SVPD      | 0.9636            | 0.9580      | 0.9638 | 0.9638 |
|            | TZVP      | 0.9603            | 0.9709      | 0.9604 | 0.9603 |
|            | TZVPD     | 0.9609            | 0.9711      | 0.9610 | 0.9609 |
|            | TZVPP     | 0.9613            | 0.9715      | 0.9614 | 0.9613 |
|            | TZVPPD    | 0.9613            | 0.9714      | 0.9615 | 0.9613 |
|            | QZVP      | 0.9606            | 0.9710      | 0.9607 | 0.9606 |
|            | QZVPD     | 0.9611            | 0.9715      | 0.9612 | 0.9611 |
|            | QZVPP     | 0.9606            | 0.9710      | 0.9607 | 0.9606 |
|            | QZVPPD    | 0.9611            | 0.9715      | 0.9612 | 0.9611 |
| MN12-L     | SVP       | 0.9474            | 0.9454      | 0.9475 | 0.9476 |
|            | SVPD      | 0.9492            | 0.9470      | 0.9493 | 0.9494 |
|            | TZVP      | 0.9508            | 0.9610      | 0.9509 | 0.9508 |
|            | TZVPD     | 0.9510            | 0.9610      | 0.9511 | 0.9510 |
|            | TZVPP     | 0.9503            | 0.9599      | 0.9504 | 0.9503 |
|            | TZVPPD    | 0.9503            | 0.9598      | 0.9504 | 0.9503 |
|            | QZVP      | 0.9505            | 0.9601      | 0.9506 | 0.9505 |
|            | QZVPD     | 0.9507            | 0.9602      | 0.9508 | 0.9507 |
|            | QZVPP     | 0.9505            | 0.9601      | 0.9506 | 0.9505 |
|            | QZVPPD    | 0.9507            | 0.9602      | 0.9508 | 0.9507 |

| Functional | Basis Set | none <sup>a</sup> | def2-SV/TZV | W06    | auto   |
|------------|-----------|-------------------|-------------|--------|--------|
| MN15-L     | SVP       | 0.9540            | 0.9640      | 0.9541 | 0.9542 |
|            | SVPD      | 0.9564            | 0.9655      | 0.9565 | 0.9565 |
|            | TZVP      | 0.9606            | 0.9698      | 0.9608 | 0.9606 |
|            | TZVPD     | 0.9613            | 0.9702      | 0.9615 | 0.9613 |
|            | TZVPP     | 0.9597            | 0.9682      | 0.9598 | 0.9597 |
|            | TZVPPD    | 0.9600            | 0.9685      | 0.9602 | 0.9601 |
|            | QZVP      | 0.9611            | 0.9709      | 0.9613 | 0.9611 |
|            | QZVPD     | 0.9613            | 0.9710      | 0.9614 | 0.9613 |
|            | QZVPP     | 0.9611            | 0.9709      | 0.9613 | 0.9611 |
|            | QZVPPD    | 0.9613            | 0.9710      | 0.9614 | 0.9613 |
| mPWPW91    | SVP       | 0.9908            | 1.0004      | 0.9909 | 0.9909 |
|            | SVPD      | 0.9906            | 0.9989      | 0.9907 | 0.9907 |
|            | TZVP      | 0.9905            | 0.9985      | 0.9906 | 0.9906 |
|            | TZVPD     | 0.9910            | 0.9988      | 0.9911 | 0.9911 |
|            | TZVPP     | 0.9894            | 0.9971      | 0.9895 | 0.9895 |
|            | TZVPPD    | 0.9896            | 0.9971      | 0.9897 | 0.9897 |
|            | QZVP      | 0.9904            | 0.9984      | 0.9905 | 0.9905 |
|            | QZVPD     | 0.9906            | 0.9984      | 0.9907 | 0.9907 |
|            | QZVPP     | 0.9904            | 0.9984      | 0.9905 | 0.9905 |
|            | QZVPPD    | 0.9906            | 0.9984      | 0.9907 | 0.9907 |
| N12        | SVP       | 0.9668            | 0.9587      | 0.9669 | 0.9670 |
|            | SVPD      | 0.9659            | 0.9572      | 0.9660 | 0.9661 |
|            | TZVP      | 0.9653            | 0.9728      | 0.9654 | 0.9653 |
|            | TZVPD     | 0.9657            | 0.9729      | 0.9657 | 0.9657 |
|            | TZVPP     | 0.9639            | 0.9710      | 0.9639 | 0.9690 |
|            | TZVPPD    | 0.9641            | 0.9709      | 0.9641 | 0.9641 |
|            | QZVP      | 0.9644            | 0.9718      | 0.9644 | 0.9644 |
|            | QZVPD     | 0.9647            | 0.9719      | 0.9647 | 0.9647 |
|            | QZVPP     | 0.9644            | 0.9718      | 0.9644 | 0.9644 |
|            | QZVPPD    | 0.9647            | 0.9719      | 0.9647 | 0.9647 |

| Functional          | Basis Set | none <sup>a</sup> | def2-SV/TZV | W06    | auto   |
|---------------------|-----------|-------------------|-------------|--------|--------|
| OLYP                | SVP       | 0.9821            | 0.9920      | 0.9822 | 0.9823 |
|                     | SVPD      | 0.9818            | 0.9901      | 0.9819 | 0.9819 |
|                     | TZVP      | 0.9832            | 0.9914      | 0.9833 | 0.9832 |
|                     | TZVPD     | 0.9836            | 0.9916      | 0.9838 | 0.9836 |
|                     | TZVPP     | 0.9825            | 0.9905      | 0.9826 | 0.9825 |
|                     | TZVPPD    | 0.9827            | 0.9905      | 0.9829 | 0.9827 |
|                     | QZVP      | 0.9831            | 0.9918      | 0.9833 | 0.9831 |
|                     | QZVPD     | 0.9833            | 0.9918      | 0.9835 | 0.9833 |
|                     | QZVPP     | 0.9831            | 0.9918      | 0.9833 | 0.9831 |
|                     | QZVPPD    | 0.9833            | 0.9918      | 0.9835 | 0.9833 |
| PBE                 | SVP       | 0.9920            | 0.9831      | 0.9921 | 0.9922 |
|                     | SVPD      | 0.9919            | 0.9821      | 0.9920 | 0.9921 |
|                     | TZVP      | 0.9924            | 1.0003      | 0.9925 | 0.9924 |
|                     | TZVPD     | 0.9929            | 1.0006      | 0.9930 | 0.9929 |
|                     | TZVPP     | 0.9913            | 0.9989      | 0.9914 | 0.9913 |
|                     | TZVPPD    | 0.9915            | 0.9989      | 0.9915 | 0.9915 |
|                     | QZVP      | 0.9923            | 1.0003      | 0.9924 | 0.9923 |
|                     | QZVPD     | 0.9925            | 1.0004      | 0.9926 | 0.9925 |
|                     | QZVPP     | 0.9923            | 1.0003      | 0.9924 | 0.9923 |
|                     | QZVPPD    | 0.9925            | 1.0004      | 0.9926 | 0.9925 |
| PBE <sub>D3BJ</sub> | SVP       | 0.9920            | 1.0016      | 0.9921 | 0.9921 |
|                     | SVPD      | 0.9919            | 1.0001      | 0.9920 | 0.9920 |
|                     | TZVP      | 0.9923            | 1.0003      | 0.9924 | 0.9924 |
|                     | TZVPD     | 0.9928            | 1.0005      | 0.9929 | 0.9929 |
|                     | TZVPP     | 0.9912            | 0.9988      | 0.9913 | 0.9913 |
|                     | TZVPPD    | 0.9914            | 0.9988      | 0.9915 | 0.9915 |
|                     | QZVP      | 0.9923            | 1.0003      | 0.9923 | 0.9923 |
|                     | QZVPD     | 0.9925            | 1.0004      | 0.9926 | 0.9926 |
|                     | QZVPP     | 0.9923            | 1.0003      | 0.9923 | 0.9923 |
|                     | QZVPPD    | 0.9925            | 1.0004      | 0.9926 | 0.9926 |

| Functional | Basis Set | none <sup>a</sup> | def2-SV/TZV | W06    | auto   |
|------------|-----------|-------------------|-------------|--------|--------|
| revTPSS    | SVP       | 0.9811            | 0.9706      | 0.9812 | 0.9813 |
|            | SVPD      | 0.9814            | 0.9704      | 0.9815 | 0.9816 |
|            | TZVP      | 0.9822            | 0.9912      | 0.9823 | 0.9822 |
|            | TZVPD     | 0.9825            | 0.9914      | 0.9827 | 0.9825 |
|            | TZVPP     | 0.9815            | 0.9904      | 0.9816 | 0.9815 |
|            | TZVPPD    | 0.9816            | 0.9903      | 0.9817 | 0.9816 |
|            | QZVP      | 0.9818            | 0.9908      | 0.9819 | 0.9818 |
|            | QZVPD     | 0.9820            | 0.9908      | 0.9820 | 0.9820 |
|            | QZVPP     | 0.9818            | 0.9908      | 0.9819 | 0.9818 |
|            | QZVPPD    | 0.9820            | 0.9908      | 0.9820 | 0.9820 |
| SOGGA11    | SVP       | 0.9804            | 0.9898      | 0.9805 | 0.9806 |
|            | SVPD      | 0.9737            | 0.9822      | 0.9739 | 0.9739 |
|            | TZVP      | 0.9816            | 0.9891      | 0.9817 | 0.9816 |
|            | TZVPD     | 0.9817            | 0.9887      | 0.9819 | 0.9818 |
|            | TZVPP     | 0.9826            | 0.9899      | 0.9827 | 0.9826 |
|            | TZVPPD    | 0.9828            | 0.9890      | 0.9840 | 0.9828 |
|            | QZVP      | 0.9810            | 0.9897      | 0.9813 | 0.9810 |
|            | QZVPD     | 0.9803            | 0.9887      | 0.9810 | 0.9803 |
|            | QZVPP     | 0.9810            | 0.9897      | 0.9813 | 0.9810 |
|            | QZVPPD    | 0.9803            | 0.9887      | 0.9810 | 0.9803 |
| TPSS       | SVP       | 0.9810            | 0.9709      | 0.9811 | 0.9812 |
|            | SVPD      | 0.9812            | 0.9705      | 0.9813 | 0.9814 |
|            | TZVP      | 0.9814            | 0.9902      | 0.9816 | 0.9815 |
|            | TZVPD     | 0.9819            | 0.9904      | 0.9820 | 0.9819 |
|            | TZVPP     | 0.9809            | 0.9895      | 0.9810 | 0.9809 |
|            | TZVPPD    | 0.9810            | 0.9894      | 0.9811 | 0.9811 |
|            | QZVP      | 0.9813            | 0.9900      | 0.9814 | 0.9813 |
|            | QZVPD     | 0.9815            | 0.9900      | 0.9816 | 0.9815 |
|            | QZVPP     | 0.9813            | 0.9900      | 0.9814 | 0.9813 |
|            | QZVPPD    | 0.9815            | 0.9900      | 0.9816 | 0.9815 |



| Functional           | Basis Set | none <sup>a</sup> | def2-SV/TZV | W06    | auto   |
|----------------------|-----------|-------------------|-------------|--------|--------|
| TPSS <sub>D3BJ</sub> | SVP       | 0.9810            | 0.9709      | 0.9811 | 0.9812 |
|                      | SVPD      | 0.9812            | 0.9705      | 0.9813 | 0.9814 |
|                      | TZVP      | 0.9815            | 0.9900      | 0.9815 | 0.9815 |
|                      | TZVPD     | 0.9818            | 0.9904      | 0.9819 | 0.9818 |
|                      | TZVPP     | 0.9809            | 0.9894      | 0.9810 | 0.9809 |
|                      | TZVPPD    | 0.9810            | 0.9894      | 0.9811 | 0.9810 |
|                      | QZVP      | 0.9813            | 0.9899      | 0.9814 | 0.9813 |
|                      | QZVPD     | 0.9815            | 0.9900      | 0.9815 | 0.9815 |
|                      | QZVPP     | 0.9813            | 0.9899      | 0.9814 | 0.9813 |
|                      | QZVPPD    | 0.9815            | 0.9900      | 0.9815 | 0.9815 |
| VSXC                 | SVP       | 0.9676            | 0.9769      | 0.9677 | 0.9677 |
|                      | SVPD      | 0.9686            | 0.9766      | 0.9687 | 0.9687 |
|                      | TZVP      | 0.9688            | 0.9766      | 0.9690 | 0.9690 |
|                      | TZVPD     | 0.9696            | 0.9771      | 0.9697 | 0.9697 |
|                      | TZVPP     | 0.9678            | 0.9753      | 0.9679 | 0.9679 |
|                      | TZVPPD    | 0.9681            | 0.9755      | 0.9682 | 0.9682 |
|                      | QZVP      | 0.9690            | 0.9772      | 0.9690 | 0.9690 |
|                      | QZVPD     | 0.9691            | 0.9773      | 0.9692 | 0.9692 |
|                      | QZVPP     | 0.9690            | 0.9772      | 0.9690 | 0.9690 |
|                      | QZVPPD    | 0.9691            | 0.9773      | 0.9692 | 0.9692 |
| XLYP                 | SVP       | 1.0013            | 1.0111      | 1.0014 | 1.0014 |
|                      | SVPD      | 0.9996            | 1.0078      | 0.9997 | 0.9997 |
|                      | TZVP      | 0.9984            | 1.0060      | 0.9985 | 0.9985 |
|                      | TZVPD     | 0.9987            | 1.0060      | 0.9988 | 0.9988 |
|                      | TZVPP     | 0.9968            | 1.0039      | 0.9968 | 0.9968 |
|                      | TZVPPD    | 0.9968            | 1.0037      | 0.9969 | 0.9969 |
|                      | QZVP      | 0.9978            | 1.0052      | 0.9978 | 0.9978 |
|                      | QZVPD     | 0.9980            | 1.0052      | 0.9980 | 0.9980 |
|                      | QZVPP     | 0.9978            | 1.0052      | 0.9978 | 0.9978 |
|                      | QZVPPD    | 0.9980            | 1.0052      | 0.9980 | 0.9980 |

| <b>Functional</b> | <b>Basis Set</b> | <b>none<sup>a</sup></b> | <b>def2-SV/TZV</b> | <b>W06</b> | <b>auto</b> |
|-------------------|------------------|-------------------------|--------------------|------------|-------------|
| τHCTH             | SVP              | 0.9774                  | 0.9681             | 0.9775     | 0.9776      |
|                   | SVPD             | 0.9780                  | 0.9679             | 0.9781     | 0.9782      |
|                   | TZVP             | 0.9779                  | 0.9857             | 0.9780     | 0.9779      |
|                   | TZVPD            | 0.9784                  | 0.9860             | 0.9785     | 0.9784      |
|                   | TZVPP            | 0.9772                  | 0.9849             | 0.9773     | 0.9773      |
|                   | TZVPPD           | 0.9774                  | 0.9849             | 0.9775     | 0.9774      |
|                   | QZVP             | 0.9777                  | 0.9860             | 0.9777     | 0.9777      |
|                   | QZVPD            | 0.9779                  | 0.9860             | 0.9779     | 0.9779      |
|                   | QZVPP            | 0.9777                  | 0.9860             | 0.9777     | 0.9777      |
|                   | QZVPPD           | 0.9779                  | 0.9860             | 0.9779     | 0.9779      |

<sup>a</sup> Not using any density fitting.

**Table S7.** Root-mean-square deviations (RMSD, cm<sup>-1</sup>) of  $\lambda_{fund}$  for various GGA and meta-GGA exchange–correlation functional–basis set–density fitting basis set combinations.

| Functional | Basis Set | none <sup>a</sup> | def2-SV/TZV | W06   | auto  |
|------------|-----------|-------------------|-------------|-------|-------|
| B97-D      | SVP       | 36.47             | 59.47       | 36.36 | 36.36 |
|            | SVPD      | 38.55             | 61.21       | 38.48 | 38.48 |
|            | TZVP      | 26.44             | 52.24       | 26.35 | 26.35 |
|            | TZVPD     | 25.22             | 52.43       | 25.19 | 25.19 |
|            | TZVPP     | 26.25             | 51.60       | 26.19 | 26.19 |
|            | TZVPPD    | 26.19             | 51.73       | 26.17 | 26.17 |
|            | QZVP      | 25.37             | 51.33       | 25.37 | 25.37 |
|            | QZVPD     | 25.17             | 51.35       | 25.17 | 25.17 |
|            | QZVPP     | 25.37             | 51.33       | 25.37 | 25.37 |
|            | QZVPPD    | 25.17             | 51.35       | 25.17 | 25.17 |
| BLYP       | SVP       | 37.79             | 68.84       | 37.73 | 38.08 |
|            | SVPD      | 40.68             | 68.76       | 40.62 | 40.60 |
|            | TZVP      | 31.16             | 64.31       | 31.20 | 31.17 |
|            | TZVPD     | 30.07             | 64.03       | 30.17 | 30.08 |
|            | TZVPP     | 29.35             | 62.42       | 29.39 | 29.36 |
|            | TZVPPD    | 29.81             | 62.55       | 29.90 | 29.82 |
|            | QZVP      | 28.63             | 61.97       | 28.76 | 28.63 |
|            | QZVPD     | 28.66             | 61.99       | 28.80 | 28.66 |
|            | QZVPP     | 28.63             | 61.97       | 28.76 | 28.63 |
|            | QZVPPD    | 28.66             | 61.99       | 28.80 | 28.66 |

| Functional | Basis Set | none <sup>a</sup> | def2-SV/TZV | W06   | auto  |
|------------|-----------|-------------------|-------------|-------|-------|
| BP86       | SVP       | 36.74             | 146.07      | 36.66 | 36.77 |
|            | SVPD      | 39.37             | 158.21      | 39.30 | 39.22 |
|            | TZVP      | 26.16             | 53.55       | 26.12 | 26.16 |
|            | TZVPD     | 25.56             | 53.74       | 25.56 | 25.56 |
|            | TZVPP     | 25.23             | 52.42       | 25.21 | 25.24 |
|            | TZVPPD    | 25.69             | 52.61       | 25.69 | 25.69 |
|            | QZVP      | 24.53             | 51.92       | 24.58 | 24.53 |
|            | QZVPD     | 24.51             | 51.96       | 24.56 | 24.51 |
|            | QZVPP     | 24.53             | 51.92       | 24.58 | 24.53 |
|            | QZVPPD    | 24.51             | 51.96       | 24.56 | 24.51 |
| HCTH       | SVP       | 43.83             | 130.40      | 43.74 | 43.71 |
|            | SVPD      | 46.08             | 152.85      | 46.01 | 45.87 |
|            | TZVP      | 30.85             | 152.35      | 30.75 | 30.84 |
|            | TZVPD     | 29.64             | 47.05       | 29.57 | 29.64 |
|            | TZVPP     | 30.29             | 45.72       | 30.25 | 30.29 |
|            | TZVPPD    | 30.41             | 46.42       | 30.38 | 30.40 |
|            | QZVP      | 29.69             | 45.43       | 29.67 | 29.69 |
|            | QZVPD     | 29.55             | 45.55       | 29.52 | 29.54 |
|            | QZVPP     | 29.69             | 45.43       | 29.67 | 29.69 |
|            | QZVPPD    | 29.55             | 45.55       | 29.52 | 29.54 |
| M06-L      | SVP       | 40.85             | 126.02      | 40.77 | 40.71 |
|            | SVPD      | 42.05             | 152.86      | 42.00 | 41.85 |
|            | TZVP      | 26.40             | 41.64       | 26.30 | 26.40 |
|            | TZVPD     | 26.75             | 42.62       | 26.71 | 26.74 |
|            | TZVPP     | 27.65             | 40.80       | 27.49 | 27.65 |
|            | TZVPPD    | 27.05             | 40.40       | 26.93 | 27.05 |
|            | QZVP      | 25.73             | 40.88       | 25.63 | 25.72 |
|            | QZVPD     | 25.22             | 40.33       | 25.10 | 25.21 |
|            | QZVPP     | 25.73             | 40.88       | 25.63 | 25.72 |
|            | QZVPPD    | 25.22             | 40.33       | 25.10 | 25.21 |

| Functional | Basis Set | none <sup>a</sup> | def2-SV/TZV | W06   | auto  |
|------------|-----------|-------------------|-------------|-------|-------|
| M06-LD3    | SVP       | 42.66             | 53.92       | 40.77 | 40.71 |
|            | SVPD      | 41.36             | 55.02       | 42.00 | 41.85 |
|            | TZVP      | 32.22             | 47.66       | 26.30 | 26.40 |
|            | TZVPD     | 32.64             | 48.49       | 26.71 | 26.74 |
|            | TZVPP     | 31.34             | 45.10       | 27.49 | 27.66 |
|            | TZVPPD    | 30.86             | 44.68       | 26.93 | 27.05 |
|            | QZVP      | 29.05             | 45.07       | 25.63 | 25.21 |
|            | QZVPD     | 28.25             | 44.34       | 25.10 | 25.73 |
|            | QZVPP     | 29.05             | 45.07       | 25.63 | 25.21 |
|            | QZVPPD    | 28.25             | 44.34       | 25.10 | 40.71 |
| M11-L      | SVP       | 67.55             | 141.20      | 67.43 | 67.22 |
|            | SVPD      | 67.83             | 174.48      | 67.76 | 67.47 |
|            | TZVP      | 55.61             | 56.46       | 55.45 | 55.60 |
|            | TZVPD     | 54.15             | 56.05       | 54.03 | 54.14 |
|            | TZVPP     | 57.10             | 57.93       | 56.98 | 57.09 |
|            | TZVPPD    | 56.77             | 57.92       | 56.65 | 56.75 |
|            | QZVP      | 54.56             | 56.00       | 54.43 | 54.56 |
|            | QZVPD     | 55.44             | 56.75       | 55.31 | 55.43 |
|            | QZVPP     | 54.56             | 56.00       | 54.43 | 54.56 |
|            | QZVPPD    | 55.44             | 56.75       | 55.31 | 55.43 |
| MN12-L     | SVP       | 38.99             | 127.27      | 38.86 | 38.78 |
|            | SVPD      | 39.70             | 155.58      | 39.60 | 39.34 |
|            | TZVP      | 30.20             | 49.39       | 30.07 | 30.20 |
|            | TZVPD     | 29.22             | 49.73       | 29.14 | 29.21 |
|            | TZVPP     | 31.95             | 49.18       | 31.84 | 31.95 |
|            | TZVPPD    | 31.91             | 49.15       | 31.81 | 31.90 |
|            | QZVP      | 33.68             | 50.33       | 33.58 | 33.67 |
|            | QZVPD     | 33.31             | 50.00       | 33.20 | 33.30 |
|            | QZVPP     | 33.68             | 50.33       | 33.58 | 33.67 |
|            | QZVPPD    | 33.31             | 50.00       | 33.20 | 33.30 |

| Functional | Basis Set | none <sup>a</sup> | def2-SV/TZV | W06   | auto  |
|------------|-----------|-------------------|-------------|-------|-------|
| MN15-L     | SVP       | 42.62             | 52.21       | 42.45 | 42.31 |
|            | SVPD      | 41.32             | 55.50       | 41.21 | 41.01 |
|            | TZVP      | 32.49             | 44.59       | 32.31 | 32.48 |
|            | TZVPD     | 30.77             | 44.53       | 30.64 | 30.48 |
|            | TZVPP     | 33.01             | 43.74       | 32.86 | 33.00 |
|            | TZVPPD    | 32.09             | 43.92       | 31.98 | 32.07 |
|            | QZVP      | 33.47             | 44.98       | 33.33 | 33.46 |
|            | QZVPD     | 33.36             | 44.98       | 33.22 | 33.35 |
|            | QZVPP     | 33.47             | 44.98       | 33.33 | 33.46 |
|            | QZVPPD    | 33.36             | 44.98       | 33.22 | 33.35 |
| mPWPW91    | SVP       | 37.46             | 61.89       | 37.39 | 37.39 |
|            | SVPD      | 40.20             | 63.23       | 40.14 | 40.14 |
|            | TZVP      | 26.76             | 52.95       | 26.72 | 26.72 |
|            | TZVPD     | 25.94             | 53.08       | 25.95 | 25.95 |
|            | TZVPP     | 25.76             | 51.92       | 25.74 | 25.74 |
|            | TZVPPD    | 26.30             | 52.20       | 26.31 | 26.31 |
|            | QZVP      | 25.18             | 51.38       | 25.23 | 25.23 |
|            | QZVPD     | 25.20             | 51.47       | 25.25 | 25.25 |
|            | QZVPP     | 25.18             | 51.38       | 25.23 | 25.23 |
|            | QZVPPD    | 25.20             | 51.47       | 25.25 | 25.25 |
| N12        | SVP       | 40.30             | 129.89      | 40.18 | 40.08 |
|            | SVPD      | 46.82             | 144.31      | 46.68 | 46.45 |
|            | TZVP      | 29.68             | 49.60       | 29.59 | 29.68 |
|            | TZVPD     | 28.50             | 50.01       | 28.42 | 28.50 |
|            | TZVPP     | 30.21             | 48.86       | 30.16 | 30.20 |
|            | TZVPPD    | 30.85             | 49.74       | 30.78 | 30.74 |
|            | QZVP      | 30.02             | 48.57       | 29.97 | 30.01 |
|            | QZVPD     | 30.15             | 48.88       | 30.10 | 30.14 |
|            | QZVPP     | 30.02             | 48.57       | 29.97 | 30.01 |
|            | QZVPPD    | 30.15             | 48.88       | 30.10 | 30.14 |

| Functional          | Basis Set | none <sup>a</sup> | def2-SV/TZV | W06   | auto  |
|---------------------|-----------|-------------------|-------------|-------|-------|
| OLYP                | SVP       | 39.05             | 60.14       | 38.96 | 39.04 |
|                     | SVPD      | 41.71             | 63.03       | 41.65 | 41.51 |
|                     | TZVP      | 30.51             | 50.44       | 30.40 | 30.51 |
|                     | TZVPD     | 27.51             | 49.50       | 27.46 | 27.50 |
|                     | TZVPP     | 28.12             | 48.33       | 28.07 | 28.11 |
|                     | TZVPPD    | 28.00             | 48.81       | 27.98 | 27.99 |
|                     | QZVP      | 27.25             | 47.95       | 27.23 | 27.24 |
|                     | QZVPD     | 27.06             | 48.07       | 27.03 | 27.06 |
|                     | QZVPP     | 27.25             | 47.95       | 27.23 | 27.24 |
|                     | QZVPPD    | 27.06             | 48.07       | 27.03 | 27.05 |
| PBE                 | SVP       | 39.04             | 144.06      | 38.97 | 39.04 |
|                     | SVPD      | 41.80             | 156.97      | 41.74 | 41.65 |
|                     | TZVP      | 27.72             | 52.06       | 27.67 | 27.72 |
|                     | TZVPD     | 26.75             | 52.11       | 26.74 | 26.75 |
|                     | TZVPP     | 26.51             | 50.79       | 26.48 | 26.51 |
|                     | TZVPPD    | 27.00             | 51.15       | 26.99 | 27.00 |
|                     | QZVP      | 25.96             | 50.27       | 25.98 | 25.95 |
|                     | QZVPD     | 25.96             | 50.38       | 25.99 | 25.96 |
|                     | QZVPP     | 25.96             | 50.27       | 25.98 | 25.95 |
|                     | QZVPPD    | 25.96             | 50.38       | 25.99 | 25.96 |
| PBE <sub>D3BJ</sub> | SVP       | 39.06             | 61.51       | 38.99 | 38.99 |
|                     | SVPD      | 41.79             | 63.03       | 41.73 | 41.73 |
|                     | TZVP      | 27.72             | 52.09       | 27.67 | 27.67 |
|                     | TZVPD     | 26.75             | 52.13       | 26.74 | 26.74 |
|                     | TZVPP     | 26.50             | 50.81       | 26.47 | 26.47 |
|                     | TZVPPD    | 26.99             | 51.17       | 26.98 | 26.98 |
|                     | QZVP      | 25.95             | 50.29       | 25.97 | 25.97 |
|                     | QZVPD     | 25.96             | 50.40       | 25.98 | 25.98 |
|                     | QZVPP     | 25.95             | 50.29       | 25.97 | 25.97 |
|                     | QZVPPD    | 25.96             | 50.40       | 25.98 | 25.98 |

| Functional | Basis Set | none <sup>a</sup> | def2-SV/TZV | W06   | auto  |
|------------|-----------|-------------------|-------------|-------|-------|
| revTPSS    | SVP       | 34.31             | 144.51      | 34.29 | 34.65 |
|            | SVPD      | 31.26             | 157.46      | 31.25 | 31.25 |
|            | TZVP      | 25.71             | 57.62       | 25.69 | 25.72 |
|            | TZVPD     | 24.86             | 57.32       | 24.90 | 24.87 |
|            | TZVPP     | 24.27             | 56.42       | 24.24 | 24.28 |
|            | TZVPPD    | 24.23             | 56.09       | 24.26 | 24.24 |
|            | QZVP      | 24.13             | 56.41       | 24.18 | 24.13 |
|            | QZVPD     | 24.00             | 56.30       | 24.05 | 24.00 |
|            | QZVPP     | 24.13             | 56.41       | 24.18 | 24.13 |
|            | QZVPPD    | 24.00             | 56.30       | 24.05 | 24.00 |
| SOGGA11    | SVP       | 52.08             | 62.96       | 52.00 | 51.83 |
|            | SVPD      | 54.06             | 69.37       | 53.98 | 53.73 |
|            | TZVP      | 30.88             | 51.07       | 30.77 | 30.87 |
|            | TZVPD     | 34.87             | 50.64       | 34.86 | 34.86 |
|            | TZVPP     | 37.14             | 50.67       | 37.15 | 37.14 |
|            | TZVPPD    | 40.79             | 49.23       | 44.02 | 40.70 |
|            | QZVP      | 43.91             | 55.32       | 43.93 | 43.90 |
|            | QZVPD     | 62.10             | 68.14       | 61.27 | 62.09 |
|            | QZVPP     | 43.91             | 55.32       | 43.93 | 43.90 |
|            | QZVPPD    | 62.10             | 68.14       | 61.27 | 62.10 |
| TPSS       | SVP       | 33.80             | 142.65      | 33.77 | 34.11 |
|            | SVPD      | 33.00             | 156.31      | 32.98 | 32.99 |
|            | TZVP      | 24.77             | 55.90       | 24.75 | 24.78 |
|            | TZVPD     | 23.94             | 55.76       | 23.97 | 23.95 |
|            | TZVPP     | 23.39             | 54.85       | 23.37 | 23.40 |
|            | TZVPPD    | 23.63             | 54.75       | 23.66 | 23.64 |
|            | QZVP      | 23.21             | 54.75       | 23.27 | 23.22 |
|            | QZVPD     | 23.16             | 54.71       | 23.22 | 23.17 |
|            | QZVPP     | 23.21             | 54.75       | 23.26 | 23.21 |
|            | QZVPPD    | 23.16             | 54.71       | 23.22 | 23.17 |



| Functional           | Basis Set | none <sup>a</sup> | def2-SV/TZV | W06   | auto  |
|----------------------|-----------|-------------------|-------------|-------|-------|
| TPSS <sub>D3BJ</sub> | SVP       | 33.78             | 142.75      | 33.75 | 34.09 |
|                      | SVPD      | 32.97             | 156.39      | 32.94 | 32.96 |
|                      | TZVP      | 23.12             | 54.72       | 23.18 | 23.12 |
|                      | TZVPD     | 23.90             | 55.77       | 23.93 | 23.92 |
|                      | TZVPP     | 23.36             | 54.85       | 23.33 | 23.36 |
|                      | TZVPPD    | 23.59             | 54.76       | 23.62 | 23.60 |
|                      | QZVP      | 23.17             | 54.75       | 23.22 | 23.17 |
|                      | QZVPD     | 23.12             | 54.72       | 23.18 | 23.12 |
|                      | QZVPP     | 23.17             | 54.75       | 23.22 | 23.17 |
|                      | QZVPPD    | 23.12             | 54.72       | 23.18 | 23.12 |
| VSXC                 | SVP       | 40.50             | 58.74       | 40.43 | 40.43 |
|                      | SVPD      | 43.65             | 62.89       | 43.60 | 43.60 |
|                      | TZVP      | 31.02             | 51.59       | 30.93 | 30.93 |
|                      | TZVPD     | 29.78             | 51.77       | 29.73 | 29.73 |
|                      | TZVPP     | 30.07             | 50.49       | 30.04 | 30.04 |
|                      | TZVPPD    | 30.38             | 51.10       | 30.35 | 30.35 |
|                      | QZVP      | 29.29             | 50.14       | 29.30 | 29.30 |
|                      | QZVPD     | 29.23             | 50.26       | 29.23 | 29.23 |
|                      | QZVPP     | 29.29             | 50.14       | 29.30 | 29.30 |
|                      | QZVPPD    | 29.23             | 50.26       | 29.23 | 29.23 |
| XLYP                 | SVP       | 37.94             | 69.00       | 37.88 | 37.88 |
|                      | SVPD      | 40.94             | 68.95       | 40.88 | 40.88 |
|                      | TZVP      | 31.17             | 64.22       | 31.21 | 31.21 |
|                      | TZVPD     | 29.93             | 63.89       | 30.04 | 30.04 |
|                      | TZVPP     | 29.22             | 62.25       | 29.26 | 29.26 |
|                      | TZVPPD    | 29.69             | 62.41       | 29.78 | 29.78 |
|                      | QZVP      | 28.49             | 61.81       | 28.62 | 28.62 |
|                      | QZVPD     | 28.54             | 61.84       | 28.68 | 28.68 |
|                      | QZVPP     | 28.49             | 61.81       | 28.62 | 28.62 |
|                      | QZVPPD    | 28.54             | 61.84       | 28.68 | 28.68 |

| <b>Functional</b> | <b>Basis Set</b> | <b>none<sup>a</sup></b> | <b>def2-SV/TZV</b> | <b>W06</b> | <b>auto</b> |
|-------------------|------------------|-------------------------|--------------------|------------|-------------|
| τHCTH             | SVP              | 38.09                   | 134.03             | 38.00      | 38.04       |
|                   | SVPD             | 39.49                   | 155.16             | 39.42      | 39.28       |
|                   | TZVP             | 27.22                   | 47.44              | 27.13      | 27.23       |
|                   | TZVPD            | 26.31                   | 47.85              | 26.27      | 26.31       |
|                   | TZVPP            | 26.74                   | 47.14              | 26.69      | 26.47       |
|                   | TZVPPD           | 27.00                   | 47.45              | 26.97      | 26.99       |
|                   | QZVP             | 25.24                   | 47.85              | 25.26      | 25.24       |
|                   | QZVPD            | 25.17                   | 47.85              | 25.19      | 25.17       |
|                   | QZVPP            | 25.24                   | 47.85              | 25.26      | 25.23       |
|                   | QZVPPD           | 25.17                   | 47.85              | 25.19      | 25.17       |

<sup>a</sup> Not using any density fitting.

**Table S8.**  $\lambda_{harm}$  scale factors for various hybrid-GGA and hybrid-meta-GGA exchange–correlation functional–basis set combinations.

| <b>Functional</b> | <b>APFD</b>  | <b>B1B95</b> | <b>B3LYP</b> | <b>B3P86</b> | <b>B97-1</b> |
|-------------------|--------------|--------------|--------------|--------------|--------------|
| SVP               | 0.9947       | 0.9901       | 1.0045       | 0.9962       | 1.0023       |
| SVPD              | 0.9964       | 0.9913       | 1.0045       | 0.9974       | 1.0031       |
| TZVP              | 0.9974       | 0.9925       | 1.0044       | 0.9979       | 1.0034       |
| TZVPD             | 0.9979       | 0.9929       | 1.0047       | 0.9984       | 1.0038       |
| TZVPP             | 0.9965       | 0.9913       | 1.0029       | 0.9968       | 1.0023       |
| TZVPPD            | 0.9967       | 0.9915       | 1.0031       | 0.9971       | 1.0025       |
| QZVP              | 0.9973       | 0.9922       | 1.0038       | 0.9977       | 1.0029       |
| QZVPD             | 0.9975       | 0.9923       | 1.0039       | 0.9978       | 1.0031       |
| QZVPP             | 0.9973       | 0.9922       | 1.0038       | 0.9977       | 1.0029       |
| QZVPPD            | 0.9975       | 0.9923       | 1.0039       | 0.9978       | 1.0031       |
| <b>Functional</b> | <b>B97-2</b> | <b>B98</b>   | <b>BMK</b>   | <b>HISS</b>  | <b>HSE06</b> |
| SVP               | 0.9909       | 1.0014       | 0.9868       | 0.9664       | 0.9925       |
| SVPD              | 0.9922       | 1.0022       | 0.9881       | 0.9686       | 0.9939       |
| TZVP              | 0.9934       | 1.0023       | 0.9878       | 0.9694       | 0.9950       |
| TZVPD             | 0.9939       | 1.0027       | 0.9883       | 0.9700       | 0.9955       |
| TZVPP             | 0.9926       | 1.0012       | 0.9862       | 0.9684       | 0.9940       |
| TZVPPD            | 0.9927       | 1.0014       | 0.9866       | 0.9687       | 0.9942       |
| QZVP              | 0.9932       | 1.0017       | 0.9872       | 0.9695       | 0.9948       |
| QZVPD             | 0.9934       | 1.0019       | 0.9873       | 0.9696       | 0.9949       |
| QZVPP             | 0.9932       | 1.0017       | 0.9872       | 0.9695       | 0.9948       |
| QZVPPD            | 0.9934       | 1.0019       | 0.9873       | 0.9696       | 0.9949       |

| <b>Functional</b> | <b>LC-BLYP</b> | <b>LC-TPSS</b> | <b>LC-<math>\omega</math>PBE</b> | <b>M06</b>  | <b>M06-2X</b>   |
|-------------------|----------------|----------------|----------------------------------|-------------|-----------------|
| SVP               | 0.9759         | 0.9660         | 0.9784                           | 0.9991      | 0.9857          |
| SVPD              | 0.9775         | 0.9688         | 0.9806                           | 1.0007      | 0.9874          |
| TZVP              | 0.9777         | 0.9700         | 0.9817                           | 0.9979      | 0.9872          |
| TZVPD             | 0.9784         | 0.9707         | 0.9823                           | 0.9984      | 0.9877          |
| TZVPP             | 0.9764         | 0.9693         | 0.9809                           | 0.9958      | 0.9865          |
| TZVPPD            | 0.9767         | 0.9696         | 0.9811                           | 0.9961      | 0.9868          |
| QZVP              | 0.9778         | 0.9704         | 0.9820                           | 0.9957      | 0.9870          |
| QZVPD             | 0.9779         | 0.9705         | 0.9822                           | 0.9959      | 0.9871          |
| QZVPP             | 0.9778         | 0.9704         | 0.9820                           | 0.9957      | 0.9870          |
| QZVPPD            | 0.9779         | 0.9705         | 0.9822                           | 0.9959      | 0.9871          |
| <b>Functional</b> | <b>M08-HX</b>  | <b>M11</b>     | <b>MN12-SX</b>                   | <b>MN15</b> | <b>mPW1PW91</b> |
| SVP               | 0.9900         | 0.9950         | 0.9863                           | 0.9863      | 0.9904          |
| SVPD              | 0.9916         | 0.9968         | 0.9876                           | 0.9876      | 0.9918          |
| TZVP              | 0.9913         | 0.9963         | 0.9880                           | 0.9883      | 0.9928          |
| TZVPD             | 0.9918         | 0.9970         | 0.9881                           | 0.9892      | 0.9933          |
| TZVPP             | 0.9898         | 0.9936         | 0.9877                           | 0.9871      | 0.9919          |
| TZVPPD            | 0.9899         | 0.9939         | 0.9877                           | 0.9876      | 0.9920          |
| QZVP              | 0.9905         | 0.9970         | 0.9879                           | 0.9886      | 0.9926          |
| QZVPD             | 0.9907         | 0.9972         | 0.9881                           | 0.9888      | 0.9927          |
| QZVPP             | 0.9905         | 0.9970         | 0.9879                           | 0.9886      | 0.9926          |
| QZVPPD            | 0.9907         | 0.9972         | 0.9881                           | 0.9888      | 0.9927          |

| <b>Functional</b> | <b>N12-SX</b> | <b>O3LYP</b> | <b>PBE0</b>                     | <b>PW6B95</b>                    | <b>SOGGA11-X</b> |
|-------------------|---------------|--------------|---------------------------------|----------------------------------|------------------|
| SVP               | 0.9855        | 1.0032       | 0.9915                          | 0.9896                           | 0.9785           |
| SVPD              | 0.9862        | 1.0035       | 0.9930                          | 0.9903                           | 0.9807           |
| TZVP              | 0.9867        | 1.0052       | 0.9944                          | 0.9911                           | 0.9823           |
| TZVPD             | 0.9871        | 1.0056       | 0.9949                          | 0.9914                           | 0.9827           |
| TZVPP             | 0.9853        | 1.0044       | 0.9935                          | 0.9898                           | 0.9808           |
| TZVPPD            | 0.9855        | 1.0046       | 0.9937                          | 0.9899                           | 0.9810           |
| QZVP              | 0.9859        | 1.0050       | 0.9943                          | 0.9906                           | 0.9821           |
| QZVPD             | 0.9861        | 1.0052       | 0.9944                          | 0.9908                           | 0.9822           |
| QZVPP             | 0.9859        | 1.0050       | 0.9943                          | 0.9906                           | 0.9821           |
| QZVPPD            | 0.9861        | 1.0052       | 0.9944                          | 0.9908                           | 0.9822           |
| <b>Functional</b> | <b>TPSSh</b>  | <b>X3LYP</b> | <b><math>\tau</math>HCTHhyb</b> | <b><math>\omega</math>B97X-D</b> |                  |
| SVP               | 1.0042        | 1.0025       | 1.0069                          | 0.9891                           |                  |
| SVPD              | 1.0052        | 1.0025       | 1.0078                          | 0.9910                           |                  |
| TZVP              | 1.0058        | 1.0026       | 1.0073                          | 0.9914                           |                  |
| TZVPD             | 1.0062        | 1.0029       | 1.0077                          | 0.9920                           |                  |
| TZVPP             | 1.0052        | 1.0011       | 1.0064                          | 0.9901                           |                  |
| TZVPPD            | 1.0054        | 1.0012       | 1.0066                          | 0.9903                           |                  |
| QZVP              | 1.0057        | 1.0019       | 1.0070                          | 0.9910                           |                  |
| QZVPD             | 1.0058        | 1.0021       | 1.0071                          | 0.9911                           |                  |
| QZVPP             | 1.0057        | 1.0019       | 1.0070                          | 0.9910                           |                  |
| QZVPPD            | 1.0058        | 1.0021       | 1.0071                          | 0.9911                           |                  |

**Table S9.** Root-mean-square deviations (RMSD, cm<sup>-1</sup>) of  $\lambda_{\text{harm}}$  for various hybrid-GGA and hybrid-meta-GGA exchange–correlation functional–basis set combinations.

| <b>Functional</b> | <b>APFD</b>  | <b>B1B95</b> | <b>B3LYP</b> | <b>B3P86</b> | <b>B97-1</b> |
|-------------------|--------------|--------------|--------------|--------------|--------------|
| SVP               | 42.77        | 43.99        | 38.83        | 39.93        | 35.75        |
| SVPD              | 41.54        | 42.49        | 35.98        | 38.79        | 34.25        |
| TZVP              | 31.90        | 31.32        | 26.75        | 28.39        | 23.96        |
| TZVPD             | 31.92        | 31.51        | 26.63        | 28.43        | 23.33        |
| TZVPP             | 32.27        | 31.29        | 25.95        | 28.30        | 24.10        |
| TZVPPD            | 32.00        | 31.09        | 25.56        | 28.00        | 23.57        |
| QZVP              | 31.89        | 30.92        | 25.34        | 27.81        | 23.75        |
| QZVPD             | 31.90        | 30.94        | 25.37        | 27.84        | 23.65        |
| QZVPP             | 31.89        | 30.92        | 25.34        | 27.81        | 23.75        |
| QZVPPD            | 31.90        | 30.94        | 25.37        | 27.84        | 23.65        |
| <b>Functional</b> | <b>B97-2</b> | <b>B98</b>   | <b>BMK</b>   | <b>HISS</b>  | <b>HSE06</b> |
| SVP               | 39.73        | 36.63        | 53.81        | 49.82        | 43.68        |
| SVPD              | 37.99        | 35.12        | 54.41        | 49.37        | 42.01        |
| TZVP              | 27.80        | 25.65        | 41.89        | 41.40        | 31.90        |
| TZVPD             | 27.65        | 25.07        | 41.34        | 41.52        | 31.99        |
| TZVPP             | 28.11        | 25.94        | 44.90        | 41.96        | 32.17        |
| TZVPPD            | 27.79        | 25.38        | 44.02        | 41.66        | 31.91        |
| QZVP              | 27.54        | 25.60        | 44.37        | 41.38        | 31.65        |
| QZVPD             | 27.51        | 25.49        | 44.20        | 41.41        | 31.67        |
| QZVPP             | 27.54        | 25.60        | 44.37        | 41.38        | 31.65        |
| QZVPPD            | 27.51        | 25.49        | 44.20        | 41.41        | 31.67        |

| <b>Functional</b> | <b>LC-BLYP</b> | <b>LC-TPSS</b> | <b>LC-<math>\omega</math>PBE</b> | <b>M06</b>  | <b>M06-2X</b>   |
|-------------------|----------------|----------------|----------------------------------|-------------|-----------------|
| SVP               | 64.03          | 63.44          | 54.99                            | 51.34       | 49.64           |
| SVPD              | 62.37          | 62.36          | 53.66                            | 51.35       | 47.82           |
| TZVP              | 55.14          | 55.85          | 45.77                            | 41.63       | 37.26           |
| TZVPD             | 55.01          | 55.79          | 45.78                            | 41.47       | 37.64           |
| TZVPP             | 54.58          | 55.64          | 45.70                            | 42.29       | 37.54           |
| TZVPPD            | 54.01          | 55.36          | 45.42                            | 41.82       | 37.23           |
| QZVP              | 53.73          | 55.09          | 45.15                            | 40.01       | 36.93           |
| QZVPD             | 53.86          | 55.16          | 45.26                            | 39.54       | 36.95           |
| QZVPP             | 53.73          | 55.09          | 45.15                            | 40.01       | 36.93           |
| QZVPPD            | 53.86          | 55.16          | 45.26                            | 39.54       | 36.95           |
| <b>Functional</b> | <b>M08-HX</b>  | <b>M11</b>     | <b>MN12-SX</b>                   | <b>MN15</b> | <b>mPW1PW91</b> |
| SVP               | 55.61          | 53.06          | 45.36                            | 49.63       | 41.67           |
| SVPD              | 54.20          | 53.45          | 44.46                            | 51.04       | 40.02           |
| TZVP              | 44.76          | 47.87          | 34.19                            | 35.49       | 30.62           |
| TZVPD             | 45.07          | 48.04          | 33.93                            | 35.31       | 30.70           |
| TZVPP             | 44.05          | 46.79          | 35.78                            | 35.97       | 30.91           |
| TZVPPD            | 44.03          | 46.46          | 35.52                            | 35.38       | 30.65           |
| QZVP              | 44.07          | 46.32          | 34.67                            | 35.15       | 30.42           |
| QZVPD             | 44.50          | 46.20          | 34.39                            | 35.21       | 30.45           |
| QZVPP             | 44.07          | 46.32          | 34.67                            | 35.15       | 30.42           |
| QZVPPD            | 44.50          | 46.20          | 34.39                            | 35.21       | 30.45           |

| <b>Functional</b> | <b>N12-SX</b> | <b>O3LYP</b> | <b>PBE0</b>                     | <b>PW6B95</b>                    | <b>SOGGA11-X</b> |
|-------------------|---------------|--------------|---------------------------------|----------------------------------|------------------|
| SVP               | 42.03         | 39.14        | 43.82                           | 42.04                            | 42.53            |
| SVPD              | 43.41         | 36.60        | 42.22                           | 40.04                            | 40.26            |
| TZVP              | 31.27         | 25.45        | 32.21                           | 28.73                            | 33.41            |
| TZVPD             | 31.35         | 23.67        | 32.28                           | 28.98                            | 33.67            |
| TZVPP             | 31.87         | 24.56        | 32.54                           | 28.43                            | 33.62            |
| TZVPPD            | 31.92         | 23.81        | 32.29                           | 28.29                            | 33.45            |
| QZVP              | 32.47         | 23.57        | 32.10                           | 28.04                            | 33.80            |
| QZVPD             | 32.58         | 23.45        | 32.12                           | 28.09                            | 33.62            |
| QZVPP             | 32.47         | 23.57        | 32.10                           | 28.04                            | 33.80            |
| QZVPPD            | 32.58         | 23.45        | 32.12                           | 28.09                            | 33.62            |
| <b>Functional</b> | <b>TPSSh</b>  | <b>X3LYP</b> | <b><math>\tau</math>HCTHhyb</b> | <b><math>\omega</math>B97X-D</b> |                  |
| SVP               | 35.11         | 39.80        | 35.94                           | 43.10                            |                  |
| SVPD              | 29.89         | 36.85        | 34.27                           | 41.64                            |                  |
| TZVP              | 23.87         | 27.49        | 23.56                           | 33.33                            |                  |
| TZVPD             | 23.34         | 27.43        | 22.90                           | 33.21                            |                  |
| TZVPP             | 23.14         | 26.79        | 23.45                           | 33.91                            |                  |
| TZVPPD            | 22.58         | 26.42        | 22.93                           | 33.49                            |                  |
| QZVP              | 22.49         | 26.21        | 22.81                           | 33.59                            |                  |
| QZVPD             | 22.42         | 26.25        | 22.69                           | 33.52                            |                  |
| QZVPP             | 22.49         | 26.21        | 22.81                           | 33.59                            |                  |
| QZVPPD            | 22.42         | 26.25        | 22.69                           | 33.52                            |                  |



**Table S10.**  $\lambda_{PBE}$  scale factors for various hybrid-GGA and hybrid-meta-GGA exchange–correlation functional–basis set combinations.

| <b>Functional</b> | <b>APFD</b>  | <b>B1B95</b> | <b>B3LYP</b> | <b>B3P86</b> | <b>B97-1</b> |
|-------------------|--------------|--------------|--------------|--------------|--------------|
| SVP               | 0.9844       | 0.9801       | 0.9912       | 0.9855       | 0.9903       |
| SVPD              | 0.9882       | 0.9831       | 0.9935       | 0.9883       | 0.9929       |
| TZVP              | 0.9860       | 0.9806       | 0.9896       | 0.9855       | 0.9900       |
| TZVPD             | 0.9866       | 0.9810       | 0.9899       | 0.9860       | 0.9903       |
| TZVPP             | 0.9852       | 0.9796       | 0.9883       | 0.9845       | 0.9890       |
| TZVPPD            | 0.9855       | 0.9799       | 0.9885       | 0.9848       | 0.9892       |
| QZVP              | 0.9861       | 0.9805       | 0.9891       | 0.9853       | 0.9896       |
| QZVPD             | 0.9862       | 0.9806       | 0.9893       | 0.9855       | 0.9897       |
| QZVPP             | 0.9861       | 0.9805       | 0.9891       | 0.9853       | 0.9896       |
| QZVPPD            | 0.9862       | 0.9806       | 0.9893       | 0.9855       | 0.9897       |
| <b>Functional</b> | <b>B97-2</b> | <b>B98</b>   | <b>BMK</b>   | <b>HISS</b>  | <b>HSE06</b> |
| SVP               | 0.9802       | 0.9892       | 0.9757       | 0.9573       | 0.9824       |
| SVPD              | 0.9832       | 0.9919       | 0.9786       | 0.9607       | 0.9854       |
| TZVP              | 0.9814       | 0.9888       | 0.9744       | 0.9585       | 0.9833       |
| TZVPD             | 0.9818       | 0.9892       | 0.9751       | 0.9591       | 0.9837       |
| TZVPP             | 0.9805       | 0.9878       | 0.9732       | 0.9576       | 0.9823       |
| TZVPPD            | 0.9808       | 0.9880       | 0.9737       | 0.9580       | 0.9826       |
| QZVP              | 0.9812       | 0.9883       | 0.9745       | 0.9587       | 0.9831       |
| QZVPD             | 0.9813       | 0.9885       | 0.9746       | 0.9588       | 0.9833       |
| QZVPP             | 0.9812       | 0.9883       | 0.9745       | 0.9587       | 0.9831       |
| QZVPPD            | 0.9813       | 0.9885       | 0.9746       | 0.9588       | 0.9833       |

| <b>Functional</b> | <b>LC-BLYP</b> | <b>LC-TPSS</b> | <b>LC-<math>\omega</math>PBE</b> | <b>M06</b>  | <b>M06-2X</b>   |
|-------------------|----------------|----------------|----------------------------------|-------------|-----------------|
| SVP               | 0.9667         | 0.9580         | 0.9696                           | 0.9915      | 0.9762          |
| SVPD              | 0.9701         | 0.9619         | 0.9733                           | 0.9951      | 0.9795          |
| TZVP              | 0.9662         | 0.9598         | 0.9710                           | 0.9876      | 0.9755          |
| TZVPD             | 0.9670         | 0.9606         | 0.9718                           | 0.9880      | 0.9760          |
| TZVPP             | 0.9652         | 0.9593         | 0.9703                           | 0.9860      | 0.9748          |
| TZVPPD            | 0.9656         | 0.9597         | 0.9707                           | 0.9863      | 0.9751          |
| QZVP              | 0.9666         | 0.9603         | 0.9715                           | 0.9856      | 0.9753          |
| QZVPD             | 0.9667         | 0.9605         | 0.9717                           | 0.9857      | 0.9754          |
| QZVPP             | 0.9666         | 0.9603         | 0.9715                           | 0.9856      | 0.9753          |
| QZVPPD            | 0.9667         | 0.9605         | 0.9717                           | 0.9857      | 0.9754          |
| <b>Functional</b> | <b>M08-HX</b>  | <b>M11</b>     | <b>MN12-SX</b>                   | <b>MN15</b> | <b>mPW1PW91</b> |
| SVP               | 0.9817         | 0.9853         | 0.9774                           | 0.9790      | 0.9799          |
| SVPD              | 0.9853         | 0.9889         | 0.9804                           | 0.9826      | 0.9830          |
| TZVP              | 0.9817         | 0.9856         | 0.9772                           | 0.9789      | 0.9809          |
| TZVPD             | 0.9823         | 0.9864         | 0.9771                           | 0.9799      | 0.9813          |
| TZVPP             | 0.9803         | 0.9833         | 0.9774                           | 0.9779      | 0.9800          |
| TZVPPD            | 0.9805         | 0.9837         | 0.9775                           | 0.9786      | 0.9803          |
| QZVP              | 0.9805         | 0.9868         | 0.9775                           | 0.9796      | 0.9807          |
| QZVPD             | 0.9808         | 0.9871         | 0.9778                           | 0.9798      | 0.9809          |
| QZVPP             | 0.9805         | 0.9868         | 0.9775                           | 0.9796      | 0.9807          |
| QZVPPD            | 0.9808         | 0.9871         | 0.9778                           | 0.9798      | 0.9809          |

| <b>Functional</b> | <b>N12-SX</b> | <b>O3LYP</b> | <b>PBE0</b>                     | <b>PW6B95</b>                    | <b>SOGGA11-X</b> |
|-------------------|---------------|--------------|---------------------------------|----------------------------------|------------------|
| SVP               | 0.9761        | 0.9918       | 0.9817                          | 0.9788                           | 0.9684           |
| SVPD              | 0.9787        | 0.9944       | 0.9848                          | 0.9814                           | 0.9719           |
| TZVP              | 0.9755        | 0.9929       | 0.9830                          | 0.9785                           | 0.9701           |
| TZVPD             | 0.9759        | 0.9932       | 0.9835                          | 0.9788                           | 0.9705           |
| TZVPP             | 0.9743        | 0.9919       | 0.9822                          | 0.9773                           | 0.9688           |
| TZVPPD            | 0.9745        | 0.9923       | 0.9824                          | 0.9776                           | 0.9690           |
| QZVP              | 0.9750        | 0.9926       | 0.9829                          | 0.9781                           | 0.9702           |
| QZVPD             | 0.9752        | 0.9928       | 0.9831                          | 0.9783                           | 0.9703           |
| QZVPP             | 0.9750        | 0.9926       | 0.9829                          | 0.9781                           | 0.9702           |
| QZVPPD            | 0.9752        | 0.9928       | 0.9831                          | 0.9783                           | 0.9703           |
| <b>Functional</b> | <b>TPSSh</b>  | <b>X3LYP</b> | <b><math>\tau</math>HCTHhyb</b> | <b><math>\omega</math>B97X-D</b> |                  |
| SVP               | 0.9888        | 0.9895       | 0.9949                          | 0.9788                           |                  |
| SVPD              | 0.9914        | 0.9918       | 0.9976                          | 0.9821                           |                  |
| TZVP              | 0.9897        | 0.9880       | 0.9941                          | 0.9791                           |                  |
| TZVPD             | 0.9901        | 0.9883       | 0.9946                          | 0.9796                           |                  |
| TZVPP             | 0.9891        | 0.9867       | 0.9933                          | 0.9779                           |                  |
| TZVPPD            | 0.9894        | 0.9869       | 0.9936                          | 0.9782                           |                  |
| QZVP              | 0.9894        | 0.9875       | 0.9937                          | 0.9788                           |                  |
| QZVPD             | 0.9895        | 0.9877       | 0.9939                          | 0.9789                           |                  |
| QZVPP             | 0.9894        | 0.9875       | 0.9937                          | 0.9788                           |                  |
| QZVPPD            | 0.9895        | 0.9877       | 0.9939                          | 0.9789                           |                  |

**Table S11.** Root-mean-square deviations (RMSD,  $\text{cm}^{-1}$ ) of  $\lambda_{\text{harm}}$  for various hybrid-GGA and hybrid-meta-GGA exchange–correlation functional–basis set combinations.

| <b>Functional</b> | <b>APFD</b>  | <b>B1B95</b> | <b>B3LYP</b> | <b>B3P86</b> | <b>B97-1</b> |
|-------------------|--------------|--------------|--------------|--------------|--------------|
| SVP               | 0.26         | 0.31         | 0.18         | 0.24         | 0.18         |
| SVPD              | 0.21         | 0.27         | 0.15         | 0.20         | 0.14         |
| TZVP              | 0.22         | 0.28         | 0.17         | 0.22         | 0.15         |
| TZVPD             | 0.22         | 0.28         | 0.17         | 0.22         | 0.15         |
| TZVPP             | 0.24         | 0.30         | 0.18         | 0.23         | 0.17         |
| TZVPPD            | 0.23         | 0.30         | 0.18         | 0.23         | 0.17         |
| QZVP              | 0.23         | 0.29         | 0.17         | 0.22         | 0.16         |
| QZVPD             | 0.22         | 0.28         | 0.17         | 0.22         | 0.16         |
| QZVPP             | 0.23         | 0.29         | 0.17         | 0.22         | 0.16         |
| QZVPPD            | 0.22         | 0.28         | 0.17         | 0.22         | 0.16         |
| <b>Functional</b> | <b>B97-2</b> | <b>B98</b>   | <b>BMK</b>   | <b>HISS</b>  | <b>HSE06</b> |
| SVP               | 0.30         | 0.19         | 0.38         | 0.62         | 0.29         |
| SVPD              | 0.26         | 0.15         | 0.35         | 0.57         | 0.24         |
| TZVP              | 0.27         | 0.17         | 0.37         | 0.59         | 0.25         |
| TZVPD             | 0.27         | 0.17         | 0.37         | 0.58         | 0.25         |
| TZVPP             | 0.28         | 0.18         | 0.40         | 0.61         | 0.27         |
| TZVPPD            | 0.28         | 0.18         | 0.39         | 0.60         | 0.27         |
| QZVP              | 0.28         | 0.18         | 0.38         | 0.59         | 0.26         |
| QZVPD             | 0.27         | 0.17         | 0.38         | 0.59         | 0.26         |
| QZVPP             | 0.28         | 0.18         | 0.38         | 0.59         | 0.26         |
| QZVPPD            | 0.27         | 0.17         | 0.38         | 0.59         | 0.26         |

| <b>Functional</b> | <b>LC-BLYP</b> | <b>LC-TPSS</b> | <b>LC-<math>\omega</math>PBE</b> | <b>M06</b>  | <b>M06-2X</b>   |
|-------------------|----------------|----------------|----------------------------------|-------------|-----------------|
| SVP               | 0.24           | 0.62           | 0.46                             | 0.22        | 0.37            |
| SVPD              | 0.22           | 0.57           | 0.40                             | 0.19        | 0.32            |
| TZVP              | 0.20           | 0.59           | 0.43                             | 0.23        | 0.36            |
| TZVPD             | 0.20           | 0.58           | 0.42                             | 0.23        | 0.35            |
| TZVPP             | 0.20           | 0.60           | 0.44                             | 0.25        | 0.37            |
| TZVPPD            | 0.20           | 0.59           | 0.43                             | 0.24        | 0.36            |
| QZVP              | 0.19           | 0.58           | 0.42                             | 0.25        | 0.36            |
| QZVPD             | 0.19           | 0.58           | 0.42                             | 0.24        | 0.36            |
| QZVPP             | 0.19           | 0.58           | 0.42                             | 0.25        | 0.36            |
| QZVPPD            | 0.19           | 0.58           | 0.42                             | 0.24        | 0.36            |
| <b>Functional</b> | <b>M08-HX</b>  | <b>M11</b>     | <b>MN12-SX</b>                   | <b>MN15</b> | <b>mPW1PW91</b> |
| SVP               | 0.31           | 0.27           | 0.33                             | 0.34        | 0.31            |
| SVPD              | 0.27           | 0.23           | 0.29                             | 0.29        | 0.26            |
| TZVP              | 0.30           | 0.26           | 0.32                             | 0.31        | 0.28            |
| TZVPD             | 0.29           | 0.26           | 0.33                             | 0.30        | 0.28            |
| TZVPP             | 0.31           | 0.29           | 0.33                             | 0.33        | 0.29            |
| TZVPPD            | 0.31           | 0.28           | 0.33                             | 0.32        | 0.29            |
| QZVP              | 0.32           | 0.25           | 0.32                             | 0.30        | 0.28            |
| QZVPD             | 0.31           | 0.24           | 0.32                             | 0.30        | 0.28            |
| QZVPP             | 0.32           | 0.25           | 0.32                             | 0.30        | 0.28            |
| QZVPPD            | 0.31           | 0.24           | 0.32                             | 0.30        | 0.28            |

| <b>Functional</b> | <b>N12-SX</b> | <b>O3LYP</b> | <b>PBE0</b>                     | <b>PW6B95</b>                    | <b>SOGGA11-X</b> |
|-------------------|---------------|--------------|---------------------------------|----------------------------------|------------------|
| SVP               | 0.36          | 0.18         | 0.29                            | 0.32                             | 0.46             |
| SVPD              | 0.32          | 0.13         | 0.25                            | 0.28                             | 0.41             |
| TZVP              | 0.35          | 0.13         | 0.26                            | 0.31                             | 0.42             |
| TZVPD             | 0.35          | 0.13         | 0.25                            | 0.31                             | 0.42             |
| TZVPP             | 0.37          | 0.14         | 0.27                            | 0.32                             | 0.44             |
| TZVPPD            | 0.36          | 0.14         | 0.27                            | 0.32                             | 0.44             |
| QZVP              | 0.36          | 0.13         | 0.26                            | 0.31                             | 0.43             |
| QZVPD             | 0.36          | 0.13         | 0.26                            | 0.31                             | 0.42             |
| QZVPP             | 0.36          | 0.13         | 0.26                            | 0.31                             | 0.43             |
| QZVPPD            | 0.36          | 0.13         | 0.26                            | 0.31                             | 0.42             |
| <b>Functional</b> | <b>TPSSh</b>  | <b>X3LYP</b> | <b><math>\tau</math>HCTHhyb</b> | <b><math>\omega</math>B97X-D</b> |                  |
| SVP               | 0.19          | 0.20         | 0.14                            | 0.32                             |                  |
| SVPD              | 0.15          | 0.17         | 0.11                            | 0.28                             |                  |
| TZVP              | 0.16          | 0.19         | 0.11                            | 0.31                             |                  |
| TZVPD             | 0.16          | 0.19         | 0.11                            | 0.30                             |                  |
| TZVPP             | 0.17          | 0.20         | 0.12                            | 0.32                             |                  |
| TZVPPD            | 0.16          | 0.20         | 0.12                            | 0.32                             |                  |
| QZVP              | 0.16          | 0.19         | 0.11                            | 0.31                             |                  |
| QZVPD             | 0.16          | 0.19         | 0.11                            | 0.31                             |                  |
| QZVPP             | 0.16          | 0.19         | 0.11                            | 0.31                             |                  |
| QZVPPD            | 0.16          | 0.19         | 0.11                            | 0.31                             |                  |

**Table S12.**  $\lambda_{fund}$  scale factors for various hybrid-GGA and hybrid-meta-GGA exchange–correlation functional–basis set combinations.

| <b>Functional</b> | <b>APFD</b>  | <b>B1B95</b> | <b>B3LYP</b> | <b>B3P86</b> | <b>B97-1</b> |
|-------------------|--------------|--------------|--------------|--------------|--------------|
| SVP               | 0.9578       | 0.9534       | 0.9672       | 0.9592       | 0.9651       |
| SVPD              | 0.9594       | 0.9545       | 0.9671       | 0.9604       | 0.9658       |
| TZVP              | 0.9604       | 0.9556       | 0.9671       | 0.9609       | 0.9661       |
| TZVPD             | 0.9609       | 0.9561       | 0.9674       | 0.9614       | 0.9665       |
| TZVPP             | 0.9595       | 0.9545       | 0.9657       | 0.9598       | 0.9651       |
| TZVPPD            | 0.9597       | 0.9547       | 0.9658       | 0.9600       | 0.9652       |
| QZVP              | 0.9603       | 0.9554       | 0.9665       | 0.9606       | 0.9657       |
| QZVPD             | 0.9604       | 0.9555       | 0.9666       | 0.9608       | 0.9658       |
| QZVPP             | 0.9603       | 0.9554       | 0.9665       | 0.9606       | 0.9657       |
| QZVPPD            | 0.9604       | 0.9555       | 0.9666       | 0.9608       | 0.9658       |
| <b>Functional</b> | <b>B97-2</b> | <b>B98</b>   | <b>BMK</b>   | <b>HISS</b>  | <b>HSE06</b> |
| SVP               | 0.9541       | 0.9643       | 0.9501       | 0.9305       | 0.9556       |
| SVPD              | 0.9553       | 0.9649       | 0.9514       | 0.9326       | 0.9570       |
| TZVP              | 0.9565       | 0.9651       | 0.9512       | 0.9334       | 0.9580       |
| TZVPD             | 0.9570       | 0.9655       | 0.9517       | 0.9340       | 0.9585       |
| TZVPP             | 0.9557       | 0.9640       | 0.9496       | 0.9325       | 0.9571       |
| TZVPPD            | 0.9559       | 0.9642       | 0.9500       | 0.9327       | 0.9572       |
| QZVP              | 0.9563       | 0.9645       | 0.9505       | 0.9335       | 0.9578       |
| QZVPD             | 0.9565       | 0.9647       | 0.9507       | 0.9337       | 0.9580       |
| QZVPP             | 0.9563       | 0.9645       | 0.9505       | 0.9335       | 0.9578       |
| QZVPPD            | 0.9565       | 0.9647       | 0.9507       | 0.9337       | 0.9580       |

| <b>Functional</b> | <b>LC-BLYP</b> | <b>LC-TPSS</b> | <b>LC-<math>\omega</math>PBE</b> | <b>M06</b>  | <b>M06-2X</b>   |
|-------------------|----------------|----------------|----------------------------------|-------------|-----------------|
| SVP               | 0.9398         | 0.9302         | 0.9421                           | 0.9620      | 0.9491          |
| SVPD              | 0.9413         | 0.9329         | 0.9442                           | 0.9635      | 0.9508          |
| TZVP              | 0.9415         | 0.9340         | 0.9453                           | 0.9609      | 0.9506          |
| TZVPD             | 0.9421         | 0.9347         | 0.9459                           | 0.9613      | 0.9510          |
| TZVPP             | 0.9402         | 0.9334         | 0.9445                           | 0.9589      | 0.9499          |
| TZVPPD            | 0.9405         | 0.9337         | 0.9447                           | 0.9591      | 0.9502          |
| QZVP              | 0.9416         | 0.9344         | 0.9456                           | 0.9588      | 0.9504          |
| QZVPD             | 0.9417         | 0.9345         | 0.9457                           | 0.9589      | 0.9505          |
| QZVPP             | 0.9416         | 0.9344         | 0.9456                           | 0.9588      | 0.9504          |
| QZVPPD            | 0.9417         | 0.9345         | 0.9457                           | 0.9589      | 0.9505          |
| <b>Functional</b> | <b>M08-HX</b>  | <b>M11</b>     | <b>MN12-SX</b>                   | <b>MN15</b> | <b>mPW1PW91</b> |
| SVP               | 0.9533         | 0.9581         | 0.9497                           | 0.9497      | 0.9537          |
| SVPD              | 0.9548         | 0.9598         | 0.9509                           | 0.9509      | 0.9550          |
| TZVP              | 0.9545         | 0.9593         | 0.9514                           | 0.9516      | 0.9559          |
| TZVPD             | 0.9550         | 0.9601         | 0.9514                           | 0.9524      | 0.9564          |
| TZVPP             | 0.9531         | 0.9568         | 0.9511                           | 0.9504      | 0.9550          |
| TZVPPD            | 0.9532         | 0.9571         | 0.9510                           | 0.9509      | 0.9552          |
| QZVP              | 0.9537         | 0.9600         | 0.9512                           | 0.9519      | 0.9557          |
| QZVPD             | 0.9539         | 0.9602         | 0.9514                           | 0.9520      | 0.9559          |
| QZVPP             | 0.9537         | 0.9600         | 0.9512                           | 0.9519      | 0.9557          |
| QZVPPD            | 0.9539         | 0.9602         | 0.9514                           | 0.9520      | 0.9559          |



| <b>Functional</b> | <b>N12-SX</b> | <b>O3LYP</b> | <b>PBE0</b>                     | <b>PW6B95</b>                    | <b>SOGGA11-X</b> |
|-------------------|---------------|--------------|---------------------------------|----------------------------------|------------------|
| SVP               | 0.9489        | 0.9659       | 0.9547                          | 0.9529                           | 0.9422           |
| SVPD              | 0.9495        | 0.9662       | 0.9561                          | 0.9535                           | 0.9442           |
| TZVP              | 0.9500        | 0.9678       | 0.9575                          | 0.9543                           | 0.9458           |
| TZVPD             | 0.9505        | 0.9682       | 0.9580                          | 0.9546                           | 0.9462           |
| TZVPP             | 0.9487        | 0.9671       | 0.9566                          | 0.9530                           | 0.9444           |
| TZVPPD            | 0.9489        | 0.9673       | 0.9568                          | 0.9532                           | 0.9445           |
| QZVP              | 0.9492        | 0.9676       | 0.9573                          | 0.9538                           | 0.9456           |
| QZVPD             | 0.9494        | 0.9678       | 0.9575                          | 0.9540                           | 0.9457           |
| QZVPP             | 0.9492        | 0.9676       | 0.9573                          | 0.9538                           | 0.9456           |
| QZVPPD            | 0.9494        | 0.9678       | 0.9575                          | 0.9540                           | 0.9457           |
| <b>Functional</b> | <b>TPSSh</b>  | <b>X3LYP</b> | <b><math>\tau</math>HCTHhyb</b> | <b><math>\omega</math>B97X-D</b> |                  |
| SVP               | 0.9670        | 0.9653       | 0.9695                          | 0.9524                           |                  |
| SVPD              | 0.9678        | 0.9653       | 0.9703                          | 0.9542                           |                  |
| TZVP              | 0.9684        | 0.9653       | 0.9698                          | 0.9546                           |                  |
| TZVPD             | 0.9689        | 0.9656       | 0.9703                          | 0.9552                           |                  |
| TZVPP             | 0.9679        | 0.9639       | 0.9690                          | 0.9533                           |                  |
| TZVPPD            | 0.9680        | 0.9640       | 0.9692                          | 0.9536                           |                  |
| QZVP              | 0.9683        | 0.9647       | 0.9696                          | 0.9542                           |                  |
| QZVPD             | 0.9685        | 0.9648       | 0.9697                          | 0.9543                           |                  |
| QZVPP             | 0.9683        | 0.9647       | 0.9696                          | 0.9542                           |                  |
| QZVPPD            | 0.9685        | 0.9648       | 0.9697                          | 0.9543                           |                  |

**Table S13.** Root-mean-square deviations (RMSD, cm-1) of  $\lambda_{fund}$  for various hybrid-GGA and hybrid-meta-GGA exchange–correlation functional–basis set combinations.

| <b>Functional</b> | <b>APFD</b>  | <b>B1B95</b> | <b>B3LYP</b> | <b>B3P86</b> | <b>B97-1</b> |
|-------------------|--------------|--------------|--------------|--------------|--------------|
| SVP               | 37.67        | 38.20        | 32.20        | 35.19        | 32.00        |
| SVPD              | 40.10        | 40.36        | 34.90        | 37.83        | 35.38        |
| TZVP              | 25.94        | 24.40        | 19.52        | 22.50        | 20.30        |
| TZVPD             | 26.26        | 24.94        | 19.96        | 22.79        | 20.10        |
| TZVPP             | 27.10        | 25.35        | 20.00        | 23.40        | 21.46        |
| TZVPPD            | 27.44        | 25.76        | 20.57        | 23.70        | 21.78        |
| QZVP              | 26.88        | 25.12        | 19.51        | 22.87        | 21.21        |
| QZVPD             | 26.86        | 25.14        | 19.52        | 22.86        | 21.07        |
| QZVPP             | 26.88        | 25.12        | 19.51        | 22.87        | 21.21        |
| QZVPPD            | 26.86        | 25.14        | 19.52        | 22.86        | 21.07        |
| <b>Functional</b> | <b>B97-2</b> | <b>B98</b>   | <b>BMK</b>   | <b>HISS</b>  | <b>HSE06</b> |
| SVP               | 35.85        | 31.92        | 47.86        | 42.49        | 38.11        |
| SVPD              | 37.96        | 35.17        | 51.48        | 44.63        | 40.05        |
| TZVP              | 23.71        | 20.55        | 33.38        | 32.65        | 25.28        |
| TZVPD             | 23.89        | 20.34        | 32.95        | 32.96        | 25.69        |
| TZVPP             | 24.81        | 21.84        | 37.81        | 33.98        | 26.40        |
| TZVPPD            | 25.18        | 22.07        | 37.10        | 34.05        | 26.75        |
| QZVP              | 24.34        | 21.58        | 37.12        | 33.41        | 25.97        |
| QZVPD             | 24.30        | 21.43        | 36.96        | 33.41        | 25.97        |
| QZVPP             | 24.34        | 21.58        | 37.12        | 33.41        | 25.97        |
| QZVPPD            | 24.30        | 21.43        | 36.96        | 33.41        | 25.97        |

| <b>Functional</b> | <b>LC-BLYP</b> | <b>LC-TPSS</b> | <b>LC-<math>\omega</math>PBE</b> | <b>M06</b>  | <b>M06-2X</b>   |
|-------------------|----------------|----------------|----------------------------------|-------------|-----------------|
| SVP               | 51.95          | 53.06          | 46.55                            | 46.47       | 40.82           |
| SVPD              | 53.15          | 53.98          | 47.97                            | 49.31       | 42.24           |
| TZVP              | 41.88          | 44.35          | 36.49                            | 34.39       | 27.89           |
| TZVPD             | 42.06          | 44.43          | 36.81                            | 34.42       | 28.59           |
| TZVPP             | 41.94          | 44.52          | 36.93                            | 36.68       | 28.46           |
| TZVPPD            | 41.77          | 44.50          | 37.14                            | 36.56       | 28.60           |
| QZVP              | 41.22          | 44.01          | 36.56                            | 34.43       | 28.27           |
| QZVPD             | 41.34          | 44.08          | 36.69                            | 34.06       | 28.29           |
| QZVPP             | 41.22          | 44.01          | 36.56                            | 34.43       | 28.27           |
| QZVPPD            | 41.34          | 44.08          | 36.69                            | 34.06       | 28.29           |
| <b>Functional</b> | <b>M08-HX</b>  | <b>M11</b>     | <b>MN12-SX</b>                   | <b>MN15</b> | <b>mPW1PW91</b> |
| SVP               | 46.48          | 43.88          | 38.73                            | 45.76       | 36.15           |
| SVPD              | 48.10          | 47.27          | 41.41                            | 50.46       | 38.22           |
| TZVP              | 36.13          | 38.75          | 26.93                            | 32.01       | 24.09           |
| TZVPD             | 36.66          | 39.03          | 26.88                            | 32.21       | 24.46           |
| TZVPP             | 36.12          | 39.14          | 29.10                            | 33.11       | 25.18           |
| TZVPPD            | 36.59          | 39.16          | 29.40                            | 33.14       | 25.58           |
| QZVP              | 36.04          | 38.00          | 29.17                            | 32.93       | 24.83           |
| QZVPD             | 36.57          | 38.10          | 29.08                            | 32.93       | 24.87           |
| QZVPP             | 36.04          | 38.00          | 29.17                            | 32.93       | 24.83           |
| QZVPPD            | 36.57          | 38.10          | 29.08                            | 32.93       | 24.87           |

| <b>Functional</b> | <b>N12-SX</b> | <b>O3LYP</b> | <b>PBE0</b>                     | <b>PW6B95</b>                    | <b>SOGGA11-X</b> |
|-------------------|---------------|--------------|---------------------------------|----------------------------------|------------------|
| SVP               | 38.19         | 36.75        | 38.38                           | 36.07                            | 36.24            |
| SVPD              | 43.19         | 39.13        | 40.30                           | 38.43                            | 37.59            |
| TZVP              | 27.19         | 25.04        | 25.80                           | 21.95                            | 25.67            |
| TZVPD             | 27.53         | 24.08        | 26.18                           | 22.69                            | 26.07            |
| TZVPP             | 28.78         | 24.65        | 26.88                           | 22.77                            | 27.25            |
| TZVPPD            | 29.35         | 25.08        | 27.25                           | 23.43                            | 27.50            |
| QZVP              | 29.65         | 24.28        | 26.61                           | 22.59                            | 27.25            |
| QZVPD             | 29.70         | 24.19        | 26.61                           | 22.65                            | 27.13            |
| QZVPP             | 29.65         | 24.28        | 26.61                           | 22.59                            | 27.25            |
| QZVPPD            | 29.70         | 24.19        | 26.61                           | 22.65                            | 27.13            |
| <b>Functional</b> | <b>TPSSh</b>  | <b>X3LYP</b> | <b><math>\tau</math>HCTHhyb</b> | <b><math>\omega</math>B97X-D</b> |                  |
| SVP               | 29.35         | 32.64        | 32.42                           | 36.32                            |                  |
| SVPD              | 29.12         | 35.19        | 35.37                           | 38.35                            |                  |
| TZVP              | 18.52         | 19.51        | 20.82                           | 25.38                            |                  |
| TZVPD             | 18.29         | 20.05        | 20.49                           | 25.50                            |                  |
| TZVPP             | 18.02         | 20.09        | 21.38                           | 27.20                            |                  |
| TZVPPD            | 18.39         | 20.69        | 21.72                           | 27.31                            |                  |
| QZVP              | 17.68         | 19.67        | 20.67                           | 26.64                            |                  |
| QZVPD             | 17.65         | 19.69        | 20.56                           | 26.60                            |                  |
| QZVPP             | 17.68         | 19.67        | 20.67                           | 26.64                            |                  |
| QZVPPD            | 17.65         | 19.69        | 20.56                           | 26.60                            |                  |

**Table S14.**  $\lambda_{harm}$  scale factors for various double hybrid exchange–correlation functional–basis set combinations.

| <b>Functional</b> | <b>B2GP-PLYP</b> | <b>B2K-PLYP</b>      | <b>B2PLYP</b>     | <b>B2PLYP-D3BJ</b> |
|-------------------|------------------|----------------------|-------------------|--------------------|
| SVP               | 0.9854           | 0.9801               | 0.9952            | 0.9952             |
| SVPD              | 0.9901           | 0.9853               | 0.9989            | 0.9989             |
| TZVP              | 0.9911           | 0.9866               | 0.9995            | 0.9995             |
| TZVPD             | 0.9926           | 0.9882               | 1.0009            | 1.0008             |
| TZVPP             | 0.9892           | 0.9846               | 0.9977            | 0.9977             |
| TZVPPD            | 0.9901           | 0.9855               | 0.9985            | 0.9985             |
| QZVP              | 0.9897           | 0.9850               | 0.9983            | 0.9983             |
| QZVPD             | 0.9900           | 0.9854               | 0.9987            | 0.9986             |
| QZVPP             | 0.9897           | 0.9850               | 0.9983            | 0.9983             |
| QZVPPD            | 0.9900           | 0.9854               | 0.9987            | 0.9986             |
| <b>Functional</b> | <b>B2T-PLYP</b>  | <b>DSD-BLYP-D3BJ</b> | <b>DSD-PBEP86</b> | <b>mPW2PLYP</b>    |
| SVP               | 0.9881           | 1.0757               | 0.9907            | 0.9892             |
| SVPD              | 0.9923           | 1.0834               | 0.9962            | 0.9927             |
| TZVP              | 0.9932           | 1.0868               | 0.9979            | 0.9935             |
| TZVPD             | 0.9946           | 1.0895               | 0.9997            | 0.9947             |
| TZVPP             | 0.9913           | 1.0850               | 0.9957            | 0.9917             |
| TZVPPD            | 0.9921           | 1.0865               | 0.9967            | 0.9924             |
| QZVP              | 0.9919           | 1.0858               | 0.9961            | 0.9923             |
| QZVPD             | 0.9922           | 1.0865               | 0.9965            | 0.9926             |
| QZVPP             | 0.9919           | 1.0858               | 0.9961            | 0.9923             |
| QZVPPD            | 0.9922           | 1.0865               | 0.9965            | 0.9926             |

| <b>Functional</b> | <b>mPW2PLYP-D2</b> | <b>PBE0-DH</b> | <b>PBE-QIDH</b> | <b>MP2</b> |
|-------------------|--------------------|----------------|-----------------|------------|
| SVP               | 0.9899             | 0.9748         | 0.9711          | 0.9835     |
| SVPD              | 0.9935             | 0.9783         | 0.9764          | 0.9928     |
| TZVP              | 0.9942             | 0.9801         | 0.9785          | 0.9946     |
| TZVPD             | 0.9954             | 0.9811         | 0.9799          | 0.9976     |
| TZVPP             | 0.9924             | 0.9791         | 0.9770          | 0.9913     |
| TZVPPD            | 0.9931             | 0.9796         | 0.9778          | 0.9931     |
| QZVP              | 0.9930             | 0.9797         | 0.9775          | 0.9915     |
| QZVPD             | 0.9933             | 0.9799         | 0.9777          | 0.9920     |
| QZVPP             | 0.9930             | 0.9797         | 0.9775          | 0.9915     |
| QZVPPD            | 0.9933             | 0.9799         | 0.9777          | 0.9920     |

**Table S15.** Root-mean-square deviations (RMSD,  $\text{cm}^{-1}$ ) of  $\lambda_{\text{harm}}$  for various double hybrid exchange–correlation functional–basis set combinations.

| <b>Functional</b> | <b>B2GP-PLYP</b> | <b>B2K-PLYP</b>      | <b>B2PLYP</b>     | <b>B2PLYP-D3BJ</b> |
|-------------------|------------------|----------------------|-------------------|--------------------|
| SVP               | 21.71            | 21.49                | 23.06             | 23.08              |
| SVPD              | 23.78            | 23.21                | 25.44             | 25.42              |
| TZVP              | 12.27            | 12.24                | 14.03             | 14.02              |
| TZVPD             | 12.53            | 12.56                | 13.99             | 13.97              |
| TZVPP             | 10.45            | 10.76                | 11.71             | 11.68              |
| TZVPPD            | 11.14            | 11.28                | 12.51             | 12.47              |
| QZVP              | 10.44            | 11.01                | 11.28             | 11.24              |
| QZVPD             | 10.69            | 11.21                | 11.55             | 11.52              |
| QZVPP             | 10.44            | 11.01                | 11.28             | 11.24              |
| QZVPPD            | 10.69            | 11.21                | 11.55             | 11.52              |
| <b>Functional</b> | <b>B2T-PLYP</b>  | <b>DSD-BLYP-D3BJ</b> | <b>DSD-PBEP86</b> | <b>mPW2PLYP</b>    |
| SVP               | 22.14            | 33.65                | 22.38             | 23.51              |
| SVPD              | 24.05            | 30.97                | 23.33             | 24.65              |
| TZVP              | 12.37            | 29.08                | 12.00             | 12.86              |
| TZVPD             | 12.63            | 25.48                | 11.35             | 13.20              |
| TZVPP             | 10.46            | 25.42                | 9.97              | 11.06              |
| TZVPPD            | 11.11            | 24.40                | 10.20             | 11.55              |
| QZVP              | 10.36            | 22.58                | 9.62              | 11.04              |
| QZVPD             | 10.60            | 22.65                | 9.75              | 11.27              |
| QZVPP             | 10.36            | 22.58                | 9.62              | 11.04              |
| QZVPPD            | 10.60            | 22.65                | 9.75              | 11.27              |

| <b>Functional</b> | <b>mPW2PLYP-D2</b> | <b>PBE0-DH</b> | <b>PBE-QIDH</b> | <b>MP2</b> |
|-------------------|--------------------|----------------|-----------------|------------|
| SVP               | 23.81              | 37.01          | 28.46           | 35.87      |
| SVPD              | 24.90              | 36.26          | 28.14           | 39.28      |
| TZVP              | 13.54              | 27.56          | 19.06           | 31.78      |
| TZVPD             | 13.70              | 27.74          | 19.15           | 31.02      |
| TZVPP             | 12.00              | 28.25          | 19.60           | 30.78      |
| TZVPPD            | 12.23              | 27.92          | 19.17           | 32.05      |
| QZVP              | 11.98              | 28.18          | 20.03           | 29.73      |
| QZVPD             | 12.14              | 28.15          | 19.98           | 30.03      |
| QZVPP             | 11.98              | 28.18          | 20.03           | 29.73      |
| QZVPPD            | 12.14              | 28.15          | 19.98           | 30.03      |



**Table S16.**  $\lambda_{ZPE}$  scale factors for various double hybrid exchange–correlation functional–basis set combinations.

| <b>Functional</b> | <b>B2GP-PLYP</b> | <b>B2K-PLYP</b>      | <b>B2PLYP</b>     | <b>B2PLYP-D3BJ</b> |
|-------------------|------------------|----------------------|-------------------|--------------------|
| SVP               | 0.9716           | 0.9666               | 0.9808            | 0.9808             |
| SVPD              | 0.9773           | 0.9727               | 0.9859            | 0.9858             |
| TZVP              | 0.9753           | 0.9710               | 0.9832            | 0.9832             |
| TZVPD             | 0.9767           | 0.9725               | 0.9844            | 0.9844             |
| TZVPP             | 0.9738           | 0.9694               | 0.9818            | 0.9818             |
| TZVPPD            | 0.9746           | 0.9703               | 0.9825            | 0.9825             |
| QZVP              | 0.9743           | 0.9700               | 0.9824            | 0.9824             |
| QZVPD             | 0.9747           | 0.9703               | 0.9827            | 0.9827             |
| QZVPP             | 0.9743           | 0.9700               | 0.9824            | 0.9824             |
| QZVPPD            | 0.9747           | 0.9703               | 0.9827            | 0.9827             |
| <b>Functional</b> | <b>B2T-PLYP</b>  | <b>DSD-BLYP-D3BJ</b> | <b>DSD-PBEP86</b> | <b>mPW2PLYP</b>    |
| SVP               | 0.9742           | 1.0575               | 0.9774            | 0.9754             |
| SVPD              | 0.9795           | 1.0668               | 0.9838            | 0.9803             |
| TZVP              | 0.9773           | 1.0669               | 0.9825            | 0.9778             |
| TZVPD             | 0.9785           | 1.0693               | 0.9842            | 0.9789             |
| TZVPP             | 0.9758           | 1.0654               | 0.9808            | 0.9763             |
| TZVPPD            | 0.9766           | 1.0667               | 0.9817            | 0.9770             |
| QZVP              | 0.9764           | 1.0664               | 0.9814            | 0.9770             |
| QZVPD             | 0.9767           | 1.0671               | 0.9817            | 0.9773             |
| QZVPP             | 0.9764           | 1.0664               | 0.9814            | 0.9770             |
| QZVPPD            | 0.9767           | 1.0671               | 0.9817            | 0.9773             |

| <b>Functional</b> | <b>mPW2PLYP-D2</b> | <b>PBE0-DH</b> | <b>PBE-QIDH</b> | <b>MP2</b> |
|-------------------|--------------------|----------------|-----------------|------------|
| SVP               | 0.9763             | 0.9648         | 0.9601          | 0.9697     |
| SVPD              | 0.9813             | 0.9693         | 0.9661          | 0.9791     |
| TZVP              | 0.9787             | 0.9683         | 0.9655          | 0.9784     |
| TZVPD             | 0.9798             | 0.9692         | 0.9669          | 0.9812     |
| TZVPP             | 0.9773             | 0.9674         | 0.9644          | 0.9760     |
| TZVPPD            | 0.9780             | 0.9679         | 0.9651          | 0.9775     |
| QZVP              | 0.9779             | 0.9680         | 0.9649          | 0.9764     |
| QZVPD             | 0.9782             | 0.9683         | 0.9652          | 0.9769     |
| QZVPP             | 0.9779             | 0.9680         | 0.9649          | 0.9764     |
| QZVPPD            | 0.9782             | 0.9683         | 0.9652          | 0.9769     |

**Table 17.** Root-mean-square deviations (RMSD,  $\text{cm}^{-1}$ ) of  $\lambda_{ZPE}$  for various double hybrid exchange–correlation functional–basis set combinations.

| <b>Functional</b> | <b>B2GP-PLYP</b> | <b>B2K-PLYP</b>      | <b>B2PLYP</b>     | <b>B2PLYP-D3BJ</b> |
|-------------------|------------------|----------------------|-------------------|--------------------|
| SVP               | 0.39             | 0.46                 | 0.27              | 0.27               |
| SVPD              | 0.32             | 0.38                 | 0.21              | 0.21               |
| TZVP              | 0.34             | 0.40                 | 0.23              | 0.23               |
| TZVPD             | 0.32             | 0.38                 | 0.22              | 0.22               |
| TZVPP             | 0.36             | 0.42                 | 0.25              | 0.25               |
| TZVPPD            | 0.35             | 0.41                 | 0.24              | 0.25               |
| QZVP              | 0.35             | 0.41                 | 0.24              | 0.24               |
| QZVPD             | 0.35             | 0.41                 | 0.24              | 0.24               |
| QZVPP             | 0.35             | 0.41                 | 0.24              | 0.24               |
| QZVPPD            | 0.35             | 0.41                 | 0.24              | 0.24               |
| <b>Functional</b> | <b>B2T-PLYP</b>  | <b>DSD-BLYP-D3BJ</b> | <b>DSD-PBEP86</b> | <b>mPW2PLYP</b>    |
| SVP               | 0.36             | 0.72                 | 0.31              | 0.34               |
| SVPD              | 0.29             | 0.84                 | 0.23              | 0.28               |
| TZVP              | 0.31             | 0.83                 | 0.24              | 0.30               |
| TZVPD             | 0.30             | 0.86                 | 0.22              | 0.29               |
| TZVPP             | 0.33             | 0.81                 | 0.26              | 0.32               |
| TZVPPD            | 0.32             | 0.83                 | 0.25              | 0.32               |
| QZVP              | 0.32             | 0.83                 | 0.25              | 0.32               |
| QZVPD             | 0.32             | 0.83                 | 0.25              | 0.31               |
| QZVPP             | 0.32             | 0.83                 | 0.25              | 0.32               |
| QZVPPD            | 0.32             | 0.83                 | 0.25              | 0.31               |

| <b>Functional</b> | <b>mPW2PLYP-D2</b> | <b>PBE0-DH</b> | <b>PBE-QIDH</b> | <b>MP2</b> |
|-------------------|--------------------|----------------|-----------------|------------|
| SVP               | 0.33               | 0.50           | 0.56            | 0.44       |
| SVPD              | 0.27               | 0.43           | 0.47            | 0.32       |
| TZVP              | 0.29               | 0.44           | 0.48            | 0.32       |
| TZVPD             | 0.28               | 0.43           | 0.46            | 0.28       |
| TZVPP             | 0.31               | 0.46           | 0.49            | 0.35       |
| TZVPPD            | 0.30               | 0.45           | 0.48            | 0.33       |
| QZVP              | 0.30               | 0.45           | 0.48            | 0.34       |
| QZVPD             | 0.30               | 0.45           | 0.48            | 0.33       |
| QZVPP             | 0.30               | 0.45           | 0.48            | 0.34       |
| QZVPPD            | 0.30               | 0.45           | 0.48            | 0.33       |

**Table S18.**  $\lambda_{fund}$  scale factors for various double hybrid exchange–correlation functional–basis set combinations.

| <b>Functional</b> | <b>B2GP-PLYP</b> | <b>B2K-PLYP</b>      | <b>B2PLYP</b>     | <b>B2PLYP-D3BJ</b> |
|-------------------|------------------|----------------------|-------------------|--------------------|
| SVP               | 0.9487           | 0.9436               | 0.9582            | 0.9581             |
| SVPD              | 0.9532           | 0.9486               | 0.9617            | 0.9617             |
| TZVP              | 0.9542           | 0.9499               | 0.9623            | 0.9623             |
| TZVPD             | 0.9557           | 0.9515               | 0.9636            | 0.9636             |
| TZVPP             | 0.9523           | 0.9479               | 0.9605            | 0.9605             |
| TZVPPD            | 0.9532           | 0.9488               | 0.9613            | 0.9613             |
| QZVP              | 0.9529           | 0.9484               | 0.9612            | 0.9611             |
| QZVPD             | 0.9532           | 0.9487               | 0.9615            | 0.9615             |
| QZVPP             | 0.9529           | 0.9484               | 0.9612            | 0.9611             |
| QZVPPD            | 0.9532           | 0.9487               | 0.9615            | 0.9615             |
| <b>Functional</b> | <b>B2T-PLYP</b>  | <b>DSD-BLYP-D3BJ</b> | <b>DSD-PBEP86</b> | <b>mPW2PLYP</b>    |
| SVP               | 0.9513           | 1.0357               | 0.9538            | 0.9524             |
| SVPD              | 0.9553           | 1.0430               | 0.9591            | 0.9558             |
| TZVP              | 0.9562           | 1.0464               | 0.9608            | 0.9565             |
| TZVPD             | 0.9576           | 1.0489               | 0.9625            | 0.9577             |
| TZVPP             | 0.9544           | 1.0446               | 0.9586            | 0.9548             |
| TZVPPD            | 0.9552           | 1.0461               | 0.9596            | 0.9555             |
| QZVP              | 0.9550           | 1.0454               | 0.9590            | 0.9554             |
| QZVPD             | 0.9553           | 1.0460               | 0.9594            | 0.9557             |
| QZVPP             | 0.9550           | 1.0454               | 0.9590            | 0.9554             |
| QZVPPD            | 0.9553           | 1.0460               | 0.9594            | 0.9557             |

| <b>Functional</b> | <b>mPW2PLYP-D2</b> | <b>PBE0-DH</b> | <b>PBE-QIDH</b> | <b>MP2</b> |
|-------------------|--------------------|----------------|-----------------|------------|
| SVP               | 0.9531             | 0.9385         | 0.9350          | 0.9468     |
| SVPD              | 0.9565             | 0.9419         | 0.9400          | 0.9557     |
| TZVP              | 0.9572             | 0.9437         | 0.9421          | 0.9575     |
| TZVPD             | 0.9584             | 0.9446         | 0.9435          | 0.9604     |
| TZVPP             | 0.9555             | 0.9427         | 0.9406          | 0.9543     |
| TZVPPD            | 0.9562             | 0.9432         | 0.9414          | 0.9560     |
| QZVP              | 0.9561             | 0.9433         | 0.9411          | 0.9545     |
| QZVPD             | 0.9564             | 0.9435         | 0.9414          | 0.9550     |
| QZVPP             | 0.9561             | 0.9433         | 0.9411          | 0.9545     |
| QZVPPD            | 0.9564             | 0.9435         | 0.9414          | 0.9550     |

**Table S19.** Root-mean-square deviations (RMSD,  $\text{cm}^{-1}$ ) of  $\lambda_{fund}$  for various double hybrid exchange–correlation functional–basis set combinations.

| <b>Functional</b> | <b>B2GP-PLYP</b> | <b>B2K-PLYP</b>      | <b>B2PLYP</b>     | <b>B2PLYP-D3BJ</b> |
|-------------------|------------------|----------------------|-------------------|--------------------|
| SVP               | 31.23            | 31.07                | 32.14             | 32.12              |
| SVPD              | 36.44            | 35.84                | 37.88             | 37.85              |
| TZVP              | 24.31            | 23.81                | 25.94             | 25.90              |
| TZVPD             | 24.47            | 24.00                | 26.01             | 25.96              |
| TZVPP             | 25.43            | 25.24                | 26.48             | 26.43              |
| TZVPPD            | 26.33            | 26.06                | 27.44             | 27.40              |
| QZVP              | 25.39            | 25.28                | 26.30             | 26.25              |
| QZVPD             | 25.39            | 25.26                | 26.32             | 26.27              |
| QZVPP             | 25.39            | 25.28                | 26.30             | 26.25              |
| QZVPPD            | 25.39            | 25.26                | 26.32             | 26.27              |
| <b>Functional</b> | <b>B2T-PLYP</b>  | <b>DSD-BLYP-D3BJ</b> | <b>DSD-PBEP86</b> | <b>mPW2PLYP</b>    |
| SVP               | 30.71            | 37.20                | 32.88             | 29.38              |
| SVPD              | 36.07            | 41.01                | 36.90             | 34.85              |
| TZVP              | 23.66            | 35.53                | 25.02             | 21.60              |
| TZVPD             | 23.87            | 33.23                | 24.75             | 21.95              |
| TZVPP             | 24.67            | 33.77                | 26.27             | 22.56              |
| TZVPPD            | 25.58            | 34.05                | 26.97             | 23.55              |
| QZVP              | 24.62            | 32.73                | 26.12             | 22.61              |
| QZVPD             | 24.61            | 32.75                | 26.07             | 22.62              |
| QZVPP             | 24.62            | 32.73                | 26.12             | 22.61              |
| QZVPPD            | 24.61            | 32.75                | 26.07             | 22.62              |

| <b>Functional</b> | <b>mPW2PLYP-D2</b> | <b>PBE0-DH</b> | <b>PBE-QIDH</b> | <b>MP2</b> |
|-------------------|--------------------|----------------|-----------------|------------|
| SVP               | 28.98              | 35.27          | 33.25           | 50.17      |
| SVPD              | 34.48              | 37.48          | 35.71           | 54.51      |
| TZVP              | 21.14              | 24.54          | 23.63           | 45.35      |
| TZVPD             | 21.40              | 24.84          | 23.68           | 44.79      |
| TZVPP             | 22.21              | 26.28          | 25.61           | 46.46      |
| TZVPPD            | 23.10              | 26.45          | 25.82           | 47.68      |
| QZVP              | 22.26              | 26.32          | 25.96           | 45.77      |
| QZVPD             | 22.25              | 26.23          | 25.85           | 45.88      |
| QZVPP             | 22.26              | 26.32          | 25.96           | 45.77      |
| QZVPPD            | 22.25              | 26.23          | 25.85           | 45.88      |



**Table S1.** Isotopic fractionation  $\alpha$  at 50°C with respect to liquid water calculated with selected exchange-correlation functionals, the def2-TZVP basis set and SMD solvation model for a series of ketones, compared to Wang *et al.*'s experimental (expt) and calculated (calc) values, calculated using Liu *et al.*'s formula Eq. 1) for  $\beta$  using  $ZPE_{\text{harm}}$  scaled by  $\lambda_{ZPE}$ .

| ketone                                                 | Wang<br>(expt <sup>a</sup> ) | Wang<br>(calc <sup>a,b</sup> ) | M06-L | M06-LD3 | SOGGA11 | OLYP  | $\tau$ HCTH | $\tau$ HCTHD3BJ | HCTH  | HCTHD3BJ | M11-L | O3LYP | $\tau$ HCTHhyb | B3LYP |
|--------------------------------------------------------|------------------------------|--------------------------------|-------|---------|---------|-------|-------------|-----------------|-------|----------|-------|-------|----------------|-------|
| 2,2,6-trimethylcyclohexanone                           | 0.969                        | 0.965                          | 0.959 | 0.959   | 0.911   | 0.950 | 0.933       | 0.952           | 0.950 | 0.960    | 0.832 | 0.944 | 0.951          | 0.970 |
| 2,4-dimethyl-3-pentanone                               | 1.004                        | 1.012                          | 0.995 | 0.999   | 0.970   | 1.000 | 0.992       | 0.997           | 1.006 | 1.013    | 0.866 | 0.997 | 0.984          | 1.027 |
| 2-heptanone                                            | 0.855                        | 0.854                          | 0.866 | 0.870   | 0.808   | 0.861 | 0.849       | 0.844           | 0.855 | 0.857    | 0.748 | 0.850 | 0.847          | 0.875 |
| 2-methyl-3-hexanone                                    | 0.935                        | 0.923                          | 0.921 | 0.918   | 0.882   | 0.919 | 0.904       | 0.908           | 0.915 | 0.917    | 0.800 | 0.910 | 0.898          | 0.933 |
| 2-methylcyclohexanone                                  | 0.895                        | 0.924                          | 0.927 | 0.921   | 0.870   | 0.918 | 0.902       | 0.909           | 0.911 | 0.917    | 0.802 | 0.905 | 0.899          | 0.931 |
| 3,5-dimethyl-4-heptanone                               | 0.982                        | 0.988                          | 0.969 | 0.970   | 0.994   | 1.005 | 0.995       | 0.990           | 0.985 | 0.982    | 0.849 | 1.006 | 0.985          | 1.000 |
| 3-methylcyclohexanone                                  | 0.846                        | 0.904                          | 0.910 | 0.904   | 0.865   | 0.903 | 0.886       | 0.894           | 0.894 | 0.901    | 0.787 | 0.888 | 0.883          | 0.914 |
| 4-heptanone                                            | 0.871                        | 0.877                          | 0.883 | 0.894   | 0.798   | 0.895 | 0.845       | 0.879           | 0.888 | 0.854    | 0.771 | 0.848 | 0.849          | 0.880 |
| 4-methylcyclohexanone                                  | 0.858                        | 0.904                          | 0.913 | 0.905   | 0.859   | 0.902 | 0.885       | 0.892           | 0.893 | 0.898    | 0.788 | 0.887 | 0.883          | 0.914 |
| 5-nonanone                                             | 0.888                        | 0.871                          | 0.897 | 0.871   | 0.906   | 0.897 | 0.879       | 0.849           | 0.890 | 0.892    | 0.775 | 0.884 | 0.869          | 0.902 |
| cyclohexanone                                          | 0.842                        | 0.907                          | 0.914 | 0.906   | 0.856   | 0.903 | 0.886       | 0.893           | 0.894 | 0.899    | 0.791 | 0.888 | 0.884          | 0.915 |
| MAD                                                    |                              | 0.023                          | 0.027 | 0.027   | 0.032   | 0.026 | 0.023       | 0.024           | 0.020 | 0.021    | 0.103 | 0.022 | 0.021          | 0.029 |
| RMSD                                                   |                              | 0.032                          | 0.036 | 0.033   | 0.039   | 0.032 | 0.027       | 0.029           | 0.026 | 0.029    | 0.108 | 0.026 | 0.025          | 0.038 |
| $\sqrt{\frac{\pi}{2}} \left( \frac{MUE}{RMSD} \right)$ |                              | 0.902                          | 0.955 | 1.014   | 1.041   | 1.018 | 1.081       | 1.046           | 0.933 | 0.921    | 1.201 | 1.062 | 1.076          | 0.960 |
| regression <sup>c</sup> slope (m)                      |                              | 1.017                          | 1.019 | 1.016   | 0.977   | 1.020 | 1.000       | 1.005           | 1.013 | 1.014    | 0.885 | 1.005 | 0.998          | 1.031 |
| R <sup>2</sup>                                         |                              | 0.999                          | 0.999 | 0.999   | 0.999   | 0.999 | 0.999       | 0.999           | 0.999 | 0.999    | 0.999 | 0.999 | 0.999          | 0.999 |
| 1 - m                                                  |                              | 0.017                          | 0.019 | 0.016   | 0.023   | 0.020 | 0.000       | 0.005           | 0.013 | 0.014    | 0.115 | 0.005 | 0.002          | 0.031 |

<sup>a</sup> Data taken from ref.<sup>S7-8</sup> <sup>b</sup> Calculated at the B3LYP/6-311G(d,p) level of theory using a Poisson–Boltzmann continuum solvation model. <sup>c</sup> Linear regression with the y-intercept b = 0 of  $\alpha_{\text{calculated}}$  versus  $\alpha_{\text{experimental}}$ .

**Table S2.** Isotopic fractionation  $\alpha$  at 70°C with respect to liquid water calculated with selected exchange-correlation functionals, the def2-TZVP basis set and SMD solvation model for a series of ketones, compared to Wang *et al.*'s experimental (expt) and calculated (calc) values, calculated using Liu *et al.*'s formula Eq. 1) for  $\beta$  using  $ZPE_{\text{harm}}$  scaled by  $\lambda_{ZPE}$ .

| ketone                                                 | Wang<br>(expt <sup>a</sup> ) | Wang<br>(calc <sup>a,b</sup> ) | M06-L | M06-L <sub>D3</sub> | SOGGA11 | OLYP  | $\tau$ HCTH | $\tau$ HCTH <sub>D3BJ</sub> | HCTH  | HCTH <sub>D3BJ</sub> | M11-L | O3LYP | $\tau$ HCTHhyb | B3LYP |
|--------------------------------------------------------|------------------------------|--------------------------------|-------|---------------------|---------|-------|-------------|-----------------------------|-------|----------------------|-------|-------|----------------|-------|
| 2,2,6-trimethylcyclohexanone                           | 0.966                        | 0.956                          | 0.950 | 0.951               | 0.911   | 0.931 | 0.926       | 0.944                       | 0.943 | 0.940                | 0.832 | 0.937 | 0.943          | 0.960 |
| 2,4-dimethyl-3-pentanone                               | 0.975                        | 0.999                          | 0.983 | 0.988               | 0.970   | 0.976 | 0.981       | 0.985                       | 0.994 | 0.988                | 0.863 | 0.986 | 0.973          | 1.013 |
| 2-heptanone                                            | 0.860                        | 0.857                          | 0.869 | 0.872               | 0.808   | 0.853 | 0.853       | 0.848                       | 0.858 | 0.849                | 0.758 | 0.853 | 0.850          | 0.877 |
| 2-methyl-3-hexanone                                    | 0.910                        | 0.918                          | 0.917 | 0.914               | 0.882   | 0.903 | 0.901       | 0.905                       | 0.911 | 0.902                | 0.804 | 0.906 | 0.895          | 0.928 |
| 2-methylcyclohexanone                                  | 0.897                        | 0.919                          | 0.922 | 0.917               | 0.870   | 0.902 | 0.899       | 0.906                       | 0.908 | 0.902                | 0.806 | 0.902 | 0.896          | 0.926 |
| 3,5-dimethyl-4-heptanone                               | 0.968                        | 0.977                          | 0.959 | 0.960               | 0.994   | 0.980 | 0.983       | 0.979                       | 0.974 | 0.959                | 0.848 | 0.993 | 0.974          | 0.988 |
| 3-methylcyclohexanone                                  | 0.861                        | 0.902                          | 0.908 | 0.902               | 0.865   | 0.889 | 0.885       | 0.893                       | 0.893 | 0.888                | 0.793 | 0.887 | 0.882          | 0.911 |
| 4-heptanone                                            | 0.888                        | 0.877                          | 0.883 | 0.893               | 0.798   | 0.883 | 0.847       | 0.879                       | 0.887 | 0.845                | 0.778 | 0.850 | 0.851          | 0.880 |
| 4-methylcyclohexanone                                  | 0.863                        | 0.902                          | 0.910 | 0.903               | 0.859   | 0.889 | 0.885       | 0.891                       | 0.892 | 0.886                | 0.793 | 0.886 | 0.883          | 0.911 |
| 5-nonanone                                             | 0.872                        | 0.872                          | 0.896 | 0.872               | 0.906   | 0.885 | 0.879       | 0.851                       | 0.890 | 0.880                | 0.781 | 0.883 | 0.870          | 0.901 |
| cyclohexanone                                          | 0.848                        | 0.905                          | 0.911 | 0.904               | 0.856   | 0.889 | 0.886       | 0.892                       | 0.893 | 0.886                | 0.796 | 0.887 | 0.883          | 0.912 |
| MAD                                                    |                              | 0.020                          | 0.024 | 0.020               | 0.030   | 0.016 | 0.019       | 0.018                       | 0.017 | 0.019                | 0.096 | 0.020 | 0.015          | 0.030 |
| RMSD                                                   |                              | 0.027                          | 0.030 | 0.026               | 0.040   | 0.021 | 0.024       | 0.022                       | 0.022 | 0.023                | 0.099 | 0.023 | 0.020          | 0.035 |
| $\sqrt{\frac{\pi}{2}} \left( \frac{MUE}{RMSD} \right)$ |                              | 0.955                          | 0.977 | 0.940               | 0.958   | 0.974 | 1.012       | 1.064                       | 0.974 | 1.046                | 1.218 | 1.064 | 0.982          | 1.075 |
| regression <sup>c</sup> slope (m)                      |                              | 1.017                          | 1.019 | 1.016               | 0.981   | 1.007 | 1.001       | 1.006                       | 1.013 | 1.001                | 0.893 | 1.006 | 0.999          | 1.030 |
| R <sup>2</sup>                                         |                              | 0.999                          | 0.999 | 0.999               | 0.998   | 1.000 | 0.999       | 0.999                       | 1.000 | 0.999                | 0.999 | 0.999 | 1.000          | 0.999 |
| 1 - m                                                  |                              | 0.017                          | 0.019 | 0.016               | 0.019   | 0.007 | 0.001       | 0.006                       | 0.013 | 0.001                | 0.107 | 0.006 | 0.001          | 0.030 |

<sup>a</sup> Data taken from ref.<sup>S7-8</sup> <sup>b</sup> Calculated at the B3LYP/6-311G(d,p) level of theory using a Poisson–Boltzmann continuum solvation model. <sup>c</sup> Linear regression with the y-intercept b = 0 of  $\alpha_{\text{calculated}}$  versus  $\alpha_{\text{experimental}}$ .

## References

- S1. Q. Liu, J. A. Tossell and Y. Liu, *Geochim. Cosmochim. Acta*, 2010, **74**, 6965-6983.
- S2. J. Bron, C. F. Chang and M. Wolfsberg, *Z. Naturforsch., A: Phys. Sci.*, 1973, **28**, 129-136.
- S3. P. Richet, Y. Bottinga and M. Javoy, *Ann. Rev. Earth Planet. Sci.*, 1977, **5**, 65-110.
- S4. J. Horita and D. J. Wesolowski, *Geochim. Cosmochim. Acta*, 1994, **58**, 3425-3437.
- S5. J. C. Vogel, P. M. Grootes and W. G. Mook, *Zeitschrift für Physik A Hadrons and Nuclei*, 1970, **230**, 225-238.
- S6. W. G. Mook, J. C. Bommerson and W. H. Staverman, *Earth Planet. Sci. Lett.*, 1974, **22**, 169-176.
- S7. (a) Y. Wang, A. L. Sessions, R. J. Nielsen and W. A. Goddard, III, *Geochim. Cosmochim. Acta*, 2009, **73**, 7060-7075; (b) Y. Wang, A. L. Sessions, R. J. Nielsen and W. A. Goddard, III, *Geochim. Cosmochim. Acta*, 2013, **107**, 82-95.
